# Supplementary material for: Carbon Availability Affects Diurnally Controlled Processes and Cell Morphology of Cyanothece 51142
Source: PLoS One. 2013 Feb 15;8(2):e56887. doi: 10.1371/journal.pone.0056887 (PMC3574086; doi:10.1371/journal.pone.0056887)
Supplement: Table S1 — Dataset of early and late responsive genes. The table contains all genes which changed by at least 1.5-fold over the entire time course. The time points are labeled as L0.5, L2, L6, D1, D6, L6, and D6 for 30 min, 2 h, 6 h, 13 h, 18 h, 30 h and 42 h after the transition to ambient CO2 collected either during the light (L) or dark period (D). The genes were grouped into early and late responsive genes as well as genes that are differentially expressed during the entire time course. The values are given as average log2 ratios of transcripts from cells grown in 8% CO2-enriched air versus ambient CO2 for each time point. (XLS) [file pone.0056887.s004.xls]

## Sheet: Supplemental Table 1
Supplemental Table 1. Dataset of early and late responsive genes
			TIME POINTS
			L0.5	L2	L6	D1	D6	L6	D6
ORF	Functional category	Annotation	30 min	2 hours	6 hours	13 hours	18 hours	30 hours	42 hours	0.50hr-Discrete	2.00hr-Discrete	6.00hr-Discrete	14.00hr-Discrete	18.00hr-Discrete	30.00hr-Discrete	42.00hr-Discrete	BehaviorType	Response
cce_3292	Amino acid biosynthesis: Aromatic amino acid family	histidinol phosphate aminotransferase; hisC	-0.0748	-0.0071	0.7306	0.8421	0.9097	0.2055	0.8488	0	0	-1	-1	-1	0	0	3	BothEarlyAndLate
cce_0198	Amino acid biosynthesis: Glutamate family / Nitrogen assimilation	LysR family transcriptional regulatory protein, nitrogen assimilation transcriptional activator; ntcB	-0.657	-0.4149	-0.5555	0.5495	0.3918	-0.6453	0.2568	1	0	0	0	0	1	0	3	BothEarlyAndLate
cce_1223	Amino acid biosynthesis: Glutamate family / Nitrogen assimilation	ferredoxin-nitrite reductase; nirA	1.4916	2.7695	1.4417	3.0647	2.1403	2.7023	2.0157	-1	-1	-1	-1	-1	-1	-1	3	BothEarlyAndLate
cce_1844	Amino acid biosynthesis: Glutamate family / Nitrogen assimilation	unknown; contains an EF-Hand type domain	0.7448	0.6398	1.0491	1.4074	1.771	0.4242	0.7068	-1	-1	-1	-1	-1	0	-1	3	BothEarlyAndLate
cce_4370	Amino acid biosynthesis: Glutamate family / Nitrogen assimilation	argininosuccinate synthetase; argG	0.7256	0.4759	0.8113	0.1324	0.538	1.0529	-0.1252	-1	0	-1	0	0	-1	0	3	BothEarlyAndLate
cce_0553	Amino acid biosynthesis: Serine family / Sulfur assimilation	serine O-acetyltransferase; cysE2	-1.0739	-0.7608	0.0395	-0.3548	3.0743	-0.0624	4.3561	1	1	0	0	-1	0	-1	3	BothEarlyAndLate
cce_3870	Amino acid biosynthesis: Serine family / Sulfur assimilation	sulfatase	0.4291	0.6245	-0.2644	0.6603	-1.2665	-0.7041	0.3542	0	-1	0	-1	1	1	0	3	BothEarlyAndLate
cce_3755	Biosynthesis of cofactors, prosthetic groups, and carriers: Carotenoid	phytoene synthase; crtB	0.0203	0.0221	-0.6462	-0.7714	0.2844	-0.2161	0.7591	0	0	1	1	0	0	-1	3	BothEarlyAndLate
cce_0320	Biosynthesis of cofactors, prosthetic groups, and carriers: Cobalamin, heme, phycobilin and porphyrin	light-dependent protochlorophyllide reductase; por	0.3033	0.4774	-0.6024	-1.039	0.2964	-0.3033	0.3238	0	0	1	1	0	0	0	3	BothEarlyAndLate
cce_1659	Biosynthesis of cofactors, prosthetic groups, and carriers: Cobalamin, heme, phycobilin and porphyrin	delta-aminolevulinic acid dehydratase; hemB2	-0.0761	0.5923	-0.108	-1.4505	0.2478	-0.2565	1.2415	0	-1	0	1	0	0	-1	3	BothEarlyAndLate
cce_2324	Biosynthesis of cofactors, prosthetic groups, and carriers: Cobalamin, heme, phycobilin and porphyrin	heme oxygenase; ho2	0.0516	-0.885	-0.338	-3.385	2.8666	-1.3413	3.7915	0	1	0	1	-1	1	-1	3	BothEarlyAndLate
cce_2573	Biosynthesis of cofactors, prosthetic groups, and carriers: Cobalamin, heme, phycobilin and porphyrin	heme oxygenase (decyclizing); ho1	0.1838	0.7719	0.0892	-0.7575	0.2522	-0.1968	1.6176	0	-1	0	1	0	0	-1	3	BothEarlyAndLate
cce_3146	Biosynthesis of cofactors, prosthetic groups, and carriers: Cobalamin, heme, phycobilin and porphyrin	geranylgeranyl hydrogenase; chlP	0.1448	1.0058	-0.2557	-0.9032	0.3876	-0.1281	1.1691	0	-1	0	1	0	0	-1	3	BothEarlyAndLate
cce_4358	Biosynthesis of cofactors, prosthetic groups, and carriers: Cobalamin, heme, phycobilin and porphyrin	magnesium chelatase, subunit H; chlH1	-0.2544	0.9076	0.3079	-1.5213	0.3896	-0.165	1.168	0	-1	0	1	0	0	-1	3	BothEarlyAndLate
cce_0844	Biosynthesis of cofactors, prosthetic groups, and carriers: Molybdopterin	molybdenum-pterin binding protein; mop	-0.3696	0.1237	1.2944	0.7454	1.0919	-0.4038	2.5086	0	0	-1	-1	-1	0	-1	3	BothEarlyAndLate
cce_2667	Biosynthesis of cofactors, prosthetic groups, and carriers: Molybdopterin	molybdopterin biosynthesis MoeB protein; moeB	0.2084	-0.1047	-0.6055	-0.765	-0.0842	0.599	-0.6909	0	0	1	1	0	-1	1	3	BothEarlyAndLate
cce_2226	Biosynthesis of cofactors, prosthetic groups, and carriers: Others	putative pterin-4-alpha-carbinolamine dehydratase; dcoH2	0.0249	-0.0912	-0.666	-0.6826	-0.2779	-1.1235	-0.2642	0	0	1	0	0	1	0	3	BothEarlyAndLate
cce_3833	Biosynthesis of cofactors, prosthetic groups, and carriers: Riboflavin	flavoprotein, putative diflavin flavoprotein	-0.7548	-0.6402	-3.8813	-0.4667	0.4912	-3.4723	0.3511	1	1	1	0	0	1	0	3	BothEarlyAndLate
cce_3835	Biosynthesis of cofactors, prosthetic groups, and carriers: Riboflavin	flavoprotein	-1.2376	-1.0427	-5.4768	-1.2506	0.0747	-5.5797	-0.3496	1	1	1	1	0	1	0	3	BothEarlyAndLate
cce_0720	Cell envelope: Membranes, lipoproteins, and porins	putative peptidoglycan-binding peptidase, M23B family	-0.8024	0.3741	-0.0123	2.5519	0.4827	1.4986	1.5614	1	0	0	-1	0	-1	-1	3	BothEarlyAndLate
cce_1513	Cell envelope: Membranes, lipoproteins, and porins	unknown; contains an S-layer homology (SLH) domain	0.274	-0.6249	-0.0953	1.9491	-0.1379	0.0615	0.1715	0	1	0	-1	0	0	0	3	BothEarlyAndLate
cce_1814	Cell envelope: Membranes, lipoproteins, and porins	putative peptidoglycan-binding peptidase, M23B family	0.1983	0.631	-0.3432	0.0375	-0.6208	0.4262	0.4544	0	-1	0	0	1	0	0	3	BothEarlyAndLate
cce_2379	Cell envelope: Membranes, lipoproteins, and porins	bacterial surface antigen D15-like protein	-0.3166	-0.8814	-0.2985	1.1417	0.0905	0.6622	0.0437	0	1	0	-1	0	-1	0	3	BothEarlyAndLate
cce_2633	Cell envelope: Membranes, lipoproteins, and porins	putative outer membrane protein	-0.6648	-0.2599	0.9165	1.8675	2.3272	1.652	0.7782	1	0	-1	-1	-1	-1	0	3	BothEarlyAndLate
cce_3517	Cell envelope: Membranes, lipoproteins, and porins	putative S-layer OprB family carbohydrate-selective porin	-0.0318	-1.5536	-0.7617	1.3962	-0.2142	-0.9507	0.0777	0	1	1	-1	0	1	0	3	BothEarlyAndLate
cce_3518	Cell envelope: Membranes, lipoproteins, and porins	putative S-layer OprB family carbohydrate-selective porin	0.2468	-0.801	-0.4267	0.3648	-0.7116	0.0808	-0.463	0	1	0	0	1	0	0	3	BothEarlyAndLate
cce_4129	Cell envelope: Membranes, lipoproteins, and porins	putative S-layer OprB family carbohydrate-selective porin	0.3686	-1.6088	-0.7425	2.0628	0.0455	0.2625	0.5141	0	1	1	-1	0	0	0	3	BothEarlyAndLate
cce_1779	Cell envelope: Murein sacculus and peptidoglycan	probable D-alanyl-D-alanine carboxypeptidase; dacB	-0.4644	-0.6635	-0.1097	0.2938	0.0314	0.7543	0.1507	0	1	0	0	0	-1	0	3	BothEarlyAndLate
cce_2331	Cell envelope: Murein sacculus and peptidoglycan	putative D-alanyl-D-alanine carboxypeptidase	0.0354	0.5997	0.4689	0.3263	-0.6061	0.3198	-0.2503	0	-1	0	0	1	0	0	3	BothEarlyAndLate
cce_2373	Cell envelope: Murein sacculus and peptidoglycan	UDP-N-acetylmuramate-alanine ligase; murC	-0.026	-1.4182	-0.7344	1.0883	-0.1963	0.3615	0.2867	0	1	1	-1	0	0	0	3	BothEarlyAndLate
cce_0043	Cell envelope: Surface polysaccharides, lipopolysaccharides and antigens	phosphoheptose isomerase; gmhA	0.1206	-1.0068	-0.6337	0.8366	-1.1455	-0.7937	-0.3055	0	1	1	-1	1	1	0	3	BothEarlyAndLate
cce_0044	Cell envelope: Surface polysaccharides, lipopolysaccharides and antigens	putative GDP-L-fucose synthase	-0.272	-0.8338	0.0318	0.9626	-1.0586	-0.3395	0.1276	0	1	0	-1	1	0	0	3	BothEarlyAndLate
cce_2372	Cell envelope: Surface polysaccharides, lipopolysaccharides and antigens	UDP-N-acetylenolpyruvoylglucosamine reductase; murB	-0.4736	-1.5842	-0.4271	1.1266	-0.2521	0.2346	0.2247	0	1	0	-1	0	0	0	3	BothEarlyAndLate
cce_2378	Cell envelope: Surface polysaccharides, lipopolysaccharides and antigens	UDP-3-O-acyl-N-acetylglucosamine deacetylase; lpxC	-0.2635	-0.9001	0.0319	0.8684	0.029	1.0825	0.0522	0	1	0	-1	0	-1	0	3	BothEarlyAndLate
cce_3234	Cell envelope: Surface polysaccharides, lipopolysaccharides and antigens	undecaprenyl-phosphate galactosephosphotransferase	0.8991	-0.8573	-0.3439	0.9758	-1.7496	-0.4841	-1.2263	-1	1	0	-1	1	0	1	3	BothEarlyAndLate
cce_1343	Cellular processes: Chaperones	chaperonin; groES	-0.1302	-0.5923	-0.9617	0.6086	1.5011	0.9357	1.3521	0	0	1	-1	-1	-1	-1	3	BothEarlyAndLate
cce_1344	Cellular processes: Chaperones	chaperonin 1; groEL1	-0.2597	-0.8273	-1.129	0.7415	2.1916	1.0483	1.9779	0	1	1	-1	-1	-1	-1	3	BothEarlyAndLate
cce_3330	Cellular processes: Chaperones	chaperonin 2; groEL2	-0.2062	-0.7356	-1.1969	-0.0499	2.0982	0.6885	2.3858	0	1	1	0	-1	-1	-1	3	BothEarlyAndLate
cce_2840	Cellular processes: Chemotaxis	putative HofG-like general secretion pathway protein	-0.1147	-0.8006	-0.4665	-0.4997	-0.9988	-1.0342	-0.5612	0	1	0	0	1	1	0	3	BothEarlyAndLate
cce_1620	Cellular processes: Detoxification	superoxide dismutase; sodB	0.2892	-0.1072	-0.7056	-1.1149	0.2603	-0.4238	0.64	0	0	1	1	0	0	-1	3	BothEarlyAndLate
cce_0554	Central intermediary metabolism: Nitrogen fixation	nitrogenase cofactor biosynthesis protein; nifB	-1.2876	-0.986	-0.0215	0.8951	3.3768	-0.0759	4.1507	1	1	0	-1	-1	0	-1	3	BothEarlyAndLate
cce_0557	Central intermediary metabolism: Nitrogen fixation	nitrogenase cofactor synthesis protein; nifS	-1.0986	-0.3568	-0.2687	0.8843	2.6566	-0.1178	3.0576	1	0	0	-1	-1	0	-1	3	BothEarlyAndLate
cce_0558	Central intermediary metabolism: Nitrogen fixation	iron-sulfur cluster assembly protein; nifU	-1.0551	-0.3322	0.1575	0.0833	2.6502	-0.0424	3.0648	1	0	0	0	-1	0	-1	3	BothEarlyAndLate
cce_0559	Central intermediary metabolism: Nitrogen fixation	nitrogenase iron protein; nifH	-0.3963	-2.1043	0.0529	-0.5596	2.6911	0.3746	1.3758	0	1	0	0	-1	0	-1	3	BothEarlyAndLate
cce_0560	Central intermediary metabolism: Nitrogen fixation	nitrogenase molybdenum-iron protein alpha chain; nifD	-0.3563	-1.534	-0.0424	-0.3123	3.3721	0.0042	2.4851	0	1	0	0	-1	0	-1	3	BothEarlyAndLate
cce_0561	Central intermediary metabolism: Nitrogen fixation	nitrogenase molybdenum-iron protein beta chain; nifK	-0.4517	-1.002	-0.15	0.2356	3.4717	0.0464	3.2709	0	1	0	0	-1	0	-1	3	BothEarlyAndLate
cce_4395	Central intermediary metabolism: Nitrogen metabolism	putative rieske 2Fe-2S family protein	-0.5907	-0.6445	-0.1848	0.6202	-0.5852	0.8355	1.0234	1	1	0	-1	1	-1	-1	3	BothEarlyAndLate
cce_1806	Central intermediary metabolism: Polysaccharides and glycoproteins	putative glycoside hydrolase, family 13	0.2476	0.1011	-0.8479	-1.512	0.2687	-0.5472	-0.094	0	0	1	1	0	0	0	3	BothEarlyAndLate
cce_2157	Central intermediary metabolism: Polysaccharides and glycoproteins	unknown	-0.07	-0.6307	0.3252	-0.1286	1.0322	0.7545	0.5943	0	1	0	0	-1	-1	-1	3	BothEarlyAndLate
cce_0172	Energy metabolism: Amino acids and amines	glutamate-1-semialdehyde aminomutase; hemL	0.872	0.3914	-0.5471	-0.9369	0.9452	0.3098	0.1277	-1	0	0	1	-1	0	0	3	BothEarlyAndLate
cce_2156	Energy metabolism: Glycolysis	enolase; eno1	-0.247	-0.2565	0.6733	-0.0929	2.0235	0.9463	1.7418	0	0	-1	0	-1	-1	-1	3	BothEarlyAndLate
cce_3612	Energy metabolism: Glycolysis	glyceraldehyde-3-phosphate dehydrogenase; gap	0.5169	0.4326	0.7533	1.2604	1.9544	0.332	1.3788	0	0	-1	-1	-1	0	-1	3	BothEarlyAndLate
cce_3746	Energy metabolism: Pentose phosphate pathway	6-phosphogluconate dehydrogenase; gnd	0.3332	0.5061	0.6604	1.3683	2.1525	0.8151	1.3751	0	0	-1	-1	-1	-1	-1	3	BothEarlyAndLate
cce_2750	Energy metabolism: Pyruvate dehydrogenase	pyruvate dehydrogenase E2 component; pdhC	0.1564	0.2215	0.647	-0.8588	0.9133	0.5244	0.7461	0	0	-1	1	-1	0	-1	3	BothEarlyAndLate
cce_3423	Energy metabolism: Sugars	UDP-glucose dehydrogenase; ugd	0.1616	0.6326	0.072	-0.4784	0.4709	-0.0099	0.7645	0	-1	0	0	0	0	-1	3	BothEarlyAndLate
cce_1133	Fatty acid, phospholipid, and sterol metabolism: Fatty acid, phospholipid, and sterol metabolism	probable long-chain-fatty-acid CoA ligase; fadD	0.0432	-0.2744	-0.6054	0.9007	-0.4047	0.0243	0.152	0	0	1	-1	0	0	0	3	BothEarlyAndLate
cce_1309	Fatty acid, phospholipid, and sterol metabolism: Fatty acid, phospholipid, and sterol metabolism	rubredoxin; rub1	0.3489	0.2183	-0.7902	-0.9198	-0.1318	-0.8433	-0.7744	0	0	1	1	0	1	1	3	BothEarlyAndLate
cce_2748	Fatty acid, phospholipid, and sterol metabolism: Fatty acid, phospholipid, and sterol metabolism	glucose/ribitol short chain dehydrogenase/reductase family protein	0.768	0.205	0.0852	0.8336	-0.3255	-0.0117	-0.3346	-1	0	0	-1	0	0	0	3	BothEarlyAndLate
cce_3178	Fatty acid, phospholipid, and sterol metabolism: Fatty acid, phospholipid, and sterol metabolism	fatty acid desaturase; desA	-0.0725	0.3644	0.7642	-0.3802	1.0775	1.2442	1.9083	0	0	-1	0	-1	-1	-1	3	BothEarlyAndLate
cce_4388	Fatty acid, phospholipid, and sterol metabolism: Fatty acid, phospholipid, and sterol metabolism	fatty acid desaturase	-0.0493	0.0671	0.6458	0.1069	0.6229	1.5392	1.5524	0	0	-1	0	-1	-1	-1	3	BothEarlyAndLate
cce_0246	Other categories: Adaptations and atypical conditions	putative DNA-binding protein, starvation-inducible	0.184	0.7681	-0.235	-0.0546	0.0737	0.7796	-0.7327	0	-1	0	0	0	-1	1	3	BothEarlyAndLate
cce_0951	Other categories: Hydrogenase	hydrogenase accessory protein; hupE	0.0627	0.6226	0.5796	-0.5712	-0.192	-0.2501	1.7115	0	-1	0	0	0	0	-1	3	BothEarlyAndLate
cce_2703	Other categories: Hydrogenase	hydrogenase expression/formation protein; hypE	-0.7916	-1.121	-0.2129	1.4671	0.4767	0.9507	1.2656	1	1	0	-1	0	-1	-1	3	BothEarlyAndLate
cce_0242	Other categories: Other	glycosyl transferase, group 1	-0.1819	0.4177	0.9374	0.216	0.4963	0.9265	0.797	0	0	-1	0	0	-1	-1	3	BothEarlyAndLate
cce_0243	Other categories: Other	glycosyl transferase, group 1	-0.2727	0.0377	0.7976	0.2178	0.5318	0.1788	0.7502	0	0	-1	0	0	0	-1	3	BothEarlyAndLate
cce_0707	Other categories: Other	phosphoglucosamine mutase; glmM	0.0198	-1.0549	-0.197	0.9216	-0.3009	0.04	0.5632	0	1	0	-1	0	0	0	3	BothEarlyAndLate
cce_1525	Other categories: Other	ferripyochelin binding protein; yrdA	0.0797	-0.3761	-0.6804	-2.0562	-0.5658	-0.6533	-0.4115	0	0	1	1	0	1	0	3	BothEarlyAndLate
cce_2363	Other categories: Other	probable glycosyl transferase, family 2	-0.2319	0.0943	0.7163	0.2613	0.9788	0.4043	1.0797	0	0	-1	0	-1	0	-1	3	BothEarlyAndLate
cce_2799	Other categories: Other	glycosyl transferase	-0.2652	-0.819	-0.7899	1.6956	0.815	0.8746	1.297	0	1	1	-1	-1	-1	-1	3	BothEarlyAndLate
cce_2800	Other categories: Other	glycosyl transferase, group 1	-0.2242	-0.8285	-0.321	1.7792	0.7113	0.6284	1.04	0	1	0	-1	-1	-1	-1	3	BothEarlyAndLate
cce_3121	Other categories: Other	caffeoyl-CoA O-methyltransferase	0.4923	0.8142	0.0077	-0.1045	-0.0127	-0.7209	-0.0262	0	-1	0	0	0	1	0	3	BothEarlyAndLate
cce_3126	Other categories: Other	peroxiredoxin	-1.25	-1.8651	-0.4966	-1.302	0.6442	-0.1871	2.4703	1	1	0	1	0	0	-1	3	BothEarlyAndLate
cce_3293	Other categories: Other	probable inositol monophosphatase family; suhB	0.0211	0.0873	0.5955	0.5615	1.0368	0.3494	0.9604	0	0	-1	0	-1	0	-1	3	BothEarlyAndLate
cce_3635	Other categories: Other	flavoprotein	-0.1653	-0.046	-1.0661	-0.1022	0.0229	-0.4546	-0.9473	0	0	1	0	0	0	1	3	BothEarlyAndLate
cce_3724	Other categories: Other	putative FKBP-type peptidyl-prolyl cis-trans isomerase	0.107	0.3888	0.6658	0.3918	0.2946	0.7296	-0.3231	0	0	-1	0	0	-1	0	3	BothEarlyAndLate
cce_4164	Other categories: Other	phosphoglycerate mutase	-0.1491	-0.2413	0.6909	-0.083	-0.638	-0.2399	0.768	0	0	-1	0	1	0	-1	3	BothEarlyAndLate
cce_4558	Other categories: Other	glycosyl transferase, group 1	-0.3999	0.0032	0.5877	0.2379	0.4431	0.7143	0.7764	0	0	-1	0	0	-1	-1	3	BothEarlyAndLate
cce_4664	Other categories: Other	hypothetical protein	0.6816	0.6789	-0.4585	-0.2734	-1.3062	-0.5298	-1.3638	-1	-1	0	0	1	0	1	3	BothEarlyAndLate
cce_4901	Other categories: Other	probable short-chain dehydrogenase/reductase SDR	0.0473	-0.4296	-0.6349	0.0239	-0.7767	0.0186	-1.1405	0	0	1	0	1	0	1	3	BothEarlyAndLate
cce_1475	Other categories: WD repeat proteins	WD-repeat protein	-0.1465	-0.4422	-1.0173	-0.2614	0.3261	-0.4857	0.7615	0	0	1	0	0	0	-1	3	BothEarlyAndLate
cce_2434	Photosynthesis and respiration: CO2 fixation	carbon dioxide concentrating mechanism protein; ccmK3	0.2734	0.206	-0.5947	-0.6034	1.225	0.1389	0.6633	0	0	1	1	-1	0	-1	3	BothEarlyAndLate
cce_3164	Photosynthesis and respiration: CO2 fixation	ribulose bisphosphate carboxylase small subunit; rbcS	-0.4316	-0.1031	-1.9883	-2.0081	1.1843	-1.4093	2.0923	0	0	1	1	-1	1	-1	3	BothEarlyAndLate
cce_3166	Photosynthesis and respiration: CO2 fixation	ribulose bisphosphate carboxylase large subunit; rbcL	-0.2694	-0.0026	-2.0847	-2.8817	1.5745	-1.4615	2.2986	0	0	1	1	-1	1	-1	3	BothEarlyAndLate
cce_4279	Photosynthesis and respiration: CO2 fixation	carbon dioxide concentrating mechanism protein; ccmN	-0.918	-0.3718	-0.5746	-0.9272	0.3198	-0.4863	0.7235	1	0	0	1	0	0	-1	3	BothEarlyAndLate
cce_4280	Photosynthesis and respiration: CO2 fixation	carbon dioxide concentrating mechanism protein; ccmM	-0.6949	-0.3068	-0.6048	-2.2975	1.2858	-0.356	1.7809	1	0	1	1	-1	0	-1	3	BothEarlyAndLate
cce_4281	Photosynthesis and respiration: CO2 fixation	carbon dioxide concentrating mechanism protein; ccmL	-0.6996	-0.3555	-0.6953	-2.4657	1.1398	-0.8345	1.7081	1	0	1	1	-1	1	-1	3	BothEarlyAndLate
cce_4282	Photosynthesis and respiration: CO2 fixation	carbon dioxide concentrating mechanism protein; ccmK1	-0.689	-0.2571	-0.8707	-2.6117	1.3224	-0.6629	1.7995	1	0	1	1	-1	1	-1	3	BothEarlyAndLate
cce_4283	Photosynthesis and respiration: CO2 fixation	carbon dioxide concentrating mechanism protein; ccmK2	-0.6388	-0.2162	-0.6551	-2.5947	1.2036	-0.507	2.1194	1	0	1	1	-1	0	-1	3	BothEarlyAndLate
cce_0603	Photosynthesis and respiration: NADH dehydrogenase	NADH dehydrogenase subunit 5; ndhF3	0.5211	0.5273	-2.8959	-0.0739	0.3901	-2.4313	0.9074	0	0	1	0	0	1	-1	3	BothEarlyAndLate
cce_0604	Photosynthesis and respiration: NADH dehydrogenase	NADH dehydrogenase subunit 4; ndhD3	0.3465	0.4761	-3.0035	-0.2306	0.3813	-2.9022	0.4763	0	0	1	0	0	1	0	3	BothEarlyAndLate
cce_2295	Photosynthesis and respiration: NADH dehydrogenase	NADH dehydrogenase subunit 5; ndhF1	0.1265	0.0356	0.5866	1.9334	0.5769	0.4517	0.3967	0	0	-1	-1	0	0	0	3	BothEarlyAndLate
cce_2494	Photosynthesis and respiration: NADH dehydrogenase	NADH dehydrogenase subunit 4-like protein	-0.0797	0.0447	-0.9831	0.0808	-0.0452	-1.0483	-0.2756	0	0	1	0	0	1	0	3	BothEarlyAndLate
cce_3662	Photosynthesis and respiration: NADH dehydrogenase	FAD-dependent pyridine nucleotide-disulphide oxidoreductase	0.6723	-0.1385	-0.1802	0.2555	1.484	0.7335	3.0246	-1	0	0	0	-1	-1	-1	3	BothEarlyAndLate
cce_0989	Photosynthesis and respiration: Photosystem I	photosystem I P700 chlorophyll a apoprotein subunit Ia; psaA	0.5378	0.007	-1.0207	-0.8574	-0.2676	-0.9575	-0.9653	0	0	1	1	0	1	1	3	BothEarlyAndLate
cce_0990	Photosynthesis and respiration: Photosystem I	photosystem I P700 chlorophyll a apoprotein subunit Ib; psaB	0.5033	-0.0672	-0.9216	-0.3422	0.1369	-0.6407	-0.9897	0	0	1	0	0	1	1	3	BothEarlyAndLate
cce_1289	Photosynthesis and respiration: Photosystem I	photosystem I reaction center subunit IX; psaJ	0.6729	0.4811	-0.4551	-1.0863	-0.7208	-1.1822	0.5749	-1	0	0	1	1	1	0	3	BothEarlyAndLate
cce_1290	Photosynthesis and respiration: Photosystem I	photosystem I reaction center subunit III; psaF	0.6952	0.5446	-0.6061	-1.114	-0.5338	-0.6982	0.7096	-1	0	1	1	0	1	-1	3	BothEarlyAndLate
cce_3962	Photosynthesis and respiration: Photosystem I	photosystem I reaction center subunit VIII; psaI	0.5198	0.4746	-0.8593	-1.5198	-0.9804	-0.9867	-0.0898	0	0	1	1	1	1	0	3	BothEarlyAndLate
cce_3963	Photosynthesis and respiration: Photosystem I	photosystem I reaction center subunit XI; psaL2	0.4538	0.3468	-0.9495	-1.5461	-0.8109	-1.0274	0.154	0	0	1	1	1	1	0	3	BothEarlyAndLate
cce_0267	Photosynthesis and respiration: Photosystem II	photosystem II D1 protein; psbA3	0.7549	0.9161	-0.2547	-0.8835	-0.8489	-0.9183	-0.7782	-1	-1	0	1	1	1	1	3	BothEarlyAndLate
cce_0392	Photosynthesis and respiration: Photosystem II	photosystem II protein T; psbT	0.1204	0.208	0.8024	0.3739	-0.1184	1.001	0.2218	0	0	-1	0	0	-1	0	3	BothEarlyAndLate
cce_3477	Photosynthesis and respiration: Photosystem II	photosystem II D1 protein; psbA4	0.4415	0.136	-0.6833	-0.7526	-2.9243	-0.8122	-4.5371	0	0	1	1	1	1	1	3	BothEarlyAndLate
cce_0920	Photosynthesis and respiration: Phycobilisome	phycobilisome core-membrane linker polypeptide; apcE	0.4189	0.6958	-0.6269	-2.5153	0.4311	-0.982	1.4384	0	-1	1	1	0	1	-1	3	BothEarlyAndLate
cce_2651	Photosynthesis and respiration: Phycobilisome	phycocyanin beta subunit; cpcB	0.7987	0.6166	-0.7405	-2.5306	0.2914	-0.7317	1.9295	-1	-1	1	1	0	1	-1	3	BothEarlyAndLate
cce_2652	Photosynthesis and respiration: Phycobilisome	phycocyanin alpha subunit; cpcA	0.8868	0.5408	-0.8573	-2.5702	0.3132	-0.7349	1.9223	-1	0	1	1	0	1	-1	3	BothEarlyAndLate
cce_2653	Photosynthesis and respiration: Phycobilisome	phycocyanin associated linker protein; cpcC2	1.0122	0.5871	-1.1653	-2.6562	-0.0314	-1.0187	1.3432	-1	-1	1	1	0	1	-1	3	BothEarlyAndLate
cce_2654	Photosynthesis and respiration: Phycobilisome	phycocyanin associated linker protein; cpcC1	1.1286	0.5166	-1.1606	-2.7819	-0.0158	-1.169	1.5587	-1	0	1	1	0	1	-1	3	BothEarlyAndLate
cce_2655	Photosynthesis and respiration: Phycobilisome	phycocyanin associated linker protein; cpcD	0.953	0.2571	-0.7722	-2.536	0.0836	-1.4457	2.0089	-1	0	1	1	0	1	-1	3	BothEarlyAndLate
cce_2656	Photosynthesis and respiration: Phycobilisome	phycocyanin alpha phycocyanobilin lyase; cpcE	0.6198	0.2936	-0.5289	-2.1246	0.1249	-0.9778	1.3314	-1	0	0	1	0	1	-1	3	BothEarlyAndLate
cce_2908	Photosynthesis and respiration: Phycobilisome	allophycocyanin alpha subunit; apcA	0.6015	0.4319	-0.3375	-1.8866	1.3758	-0.4569	2.6369	-1	0	0	1	-1	0	-1	3	BothEarlyAndLate
cce_2909	Photosynthesis and respiration: Phycobilisome	allophycocyanin beta subunit; apcB	0.6746	0.4349	-0.306	-1.7831	1.2253	-0.5399	2.7927	-1	0	0	1	-1	0	-1	3	BothEarlyAndLate
cce_1975	Photosynthesis and respiration: Respiratory terminal oxidases	cytochrome c oxidase subunit III; coxC1/ctaE1	0.8309	0.3212	0.6365	1.4951	1.7808	0.655	0.7451	-1	0	-1	-1	-1	-1	-1	3	BothEarlyAndLate
cce_1976	Photosynthesis and respiration: Respiratory terminal oxidases	cytochrome c oxidase subunit I; coxA1/ctaD1	0.7069	0.2242	0.4719	1.4072	2.0533	0.2192	0.3797	-1	0	0	-1	-1	0	0	3	BothEarlyAndLate
cce_1977	Photosynthesis and respiration: Respiratory terminal oxidases	cytochrome c oxidase subunit II; coxB1/ctaC1	0.7912	0.1771	0.4235	1.3431	2.2984	0.5374	1.0053	-1	0	0	-1	-1	0	-1	3	BothEarlyAndLate
cce_4600	Photosynthesis and respiration: Respiratory terminal oxidases	cytochrome c oxidase folding protein; ctaB	0.2111	0.076	0.7686	1.3281	0.6435	0.297	0.1614	0	0	-1	-1	-1	0	0	3	BothEarlyAndLate
cce_0589	Photosynthesis and respiration: Soluble electron carriers	cytochrome c family protein	0.2392	0.254	0.69	0.7377	0.2985	0.8414	3.3001	0	0	-1	-1	0	-1	-1	3	BothEarlyAndLate
cce_0841	Photosynthesis and respiration: Soluble electron carriers	pyridine nucleotide transhydrogenase beta subunit; pntB	0.7116	0.2172	0.3711	0.5387	1.7794	-0.103	-0.1357	-1	0	0	0	-1	0	0	3	BothEarlyAndLate
cce_0842	Photosynthesis and respiration: Soluble electron carriers	putative nicotinamide nucleotide transhydrogenase, subunit alpha 2 (A2); pntA-2	0.7743	0.2828	0.3947	0.4935	2.0896	-0.1077	-0.1404	-1	0	0	0	-1	0	0	3	BothEarlyAndLate
cce_0843	Photosynthesis and respiration: Soluble electron carriers	putative nicotinamide nucleotide transhydrogenase, subunit alpha 1 (A1); pntA-1	0.6107	0.2155	0.4182	0.4398	2.1673	-0.232	0.0181	-1	0	0	0	-1	0	0	3	BothEarlyAndLate
cce_1606	Photosynthesis and respiration: Soluble electron carriers	2Fe-2S ferredoxin; petF4	-1.3268	-0.759	-0.5388	-1.0982	-0.0164	-0.2646	1.9461	1	1	0	1	0	0	-1	3	BothEarlyAndLate
cce_1607	Photosynthesis and respiration: Soluble electron carriers	2Fe-2S ferredoxin; petF3	-1.3929	-0.9029	-0.6106	-1.2306	-0.0056	-0.1766	2.0371	1	1	1	1	0	0	-1	3	BothEarlyAndLate
cce_0404	Purines, pyrimidines, nucleosides, and nucleotides: Purine ribonucleotide biosynthesis	formyltetrahydrofolate deformylase; purU	0.0372	0.0567	0.6028	0.9739	-0.5806	-0.0111	0.0878	0	0	-1	-1	0	0	0	3	BothEarlyAndLate
cce_2380	Purines, pyrimidines, nucleosides, and nucleotides: Purine ribonucleotide biosynthesis	phosphoribosylaminoimidazole-succinocarboxamide synthase; purC	-0.1706	0.0371	0.7585	0.4156	-0.0471	0.6791	0.8189	0	0	-1	0	0	-1	-1	3	BothEarlyAndLate
cce_0556	Regulatory functions: Regulatory functions	4Fe-4S ferredoxin	-0.8205	-0.6313	-0.1393	0.7552	2.6594	-0.3021	3.5226	1	1	0	-1	-1	0	-1	3	BothEarlyAndLate
cce_0702	Regulatory functions: Regulatory functions	serine/threonine protein phosphatase	0.0835	-0.2567	-0.8627	-0.226	-0.8466	-0.2705	-2.0052	0	0	1	0	1	0	1	3	BothEarlyAndLate
cce_1413	Regulatory functions: Regulatory functions	probable sensory transduction histidine kinase	-0.1561	0.1693	0.8596	0.1118	0.3749	0.9053	0.8879	0	0	-1	0	0	-1	-1	3	BothEarlyAndLate
cce_3378	Regulatory functions: Regulatory functions	two-component response regulator	0.3212	-0.4193	-0.5991	1.1551	-0.421	-0.0762	0.3088	0	0	1	-1	0	0	0	3	BothEarlyAndLate
cce_4219	Regulatory functions: Regulatory functions	phosphoglycerate kinase; pgk	-0.1487	0.3776	-0.6425	-1.2817	0.0155	-0.7478	1.1487	0	0	1	1	0	1	-1	3	BothEarlyAndLate
cce_5198	Regulatory functions: Regulatory functions	serine/threonine protein phosphatase	0.0863	-0.1449	-0.6094	-0.5997	-1.2805	-0.777	-2.1	0	0	1	1	1	1	1	3	BothEarlyAndLate
cce_2424	Transcription: RNA synthesis, modification, and DNA transcription	group 4 sigma-70 RNA polymerase sigma factor H; sigH	0.2011	0.5193	0.6559	1.1985	-0.0497	-0.0874	-0.6716	0	0	-1	-1	0	0	1	3	BothEarlyAndLate
cce_1822	Translation: Aminoacyl tRNA synthetases and tRNA modification	S-adenosylmethionine synthetase; metK	-0.1126	-0.4537	-0.7246	0.3722	0.5811	0.9043	0.8956	0	0	1	0	0	-1	-1	3	BothEarlyAndLate
cce_0958	Translation: Degradation of proteins, peptides, and glycopeptides	putative peptidase M4, thermolysin	0.0096	0.0634	-0.6012	-0.7153	-1.759	-0.4731	-3.5089	0	0	1	1	1	0	1	3	BothEarlyAndLate
cce_1372	Translation: Degradation of proteins, peptides, and glycopeptides	carboxyl-terminal protease	0.2836	0.6461	-0.1496	0.7139	1.2996	1.685	1.1947	0	-1	0	-1	-1	-1	-1	3	BothEarlyAndLate
cce_4255	Translation: Degradation of proteins, peptides, and glycopeptides	protease	0.849	0.5458	0.8879	1.2771	0.9086	1.7051	0.608	-1	0	-1	-1	-1	-1	-1	3	BothEarlyAndLate
cce_1745	Translation: Nucleoproteins	DNA binding protein HU	0.0229	0.113	0.7052	0.6876	-0.4227	-0.833	1.0704	0	0	-1	-1	0	1	-1	3	BothEarlyAndLate
cce_3592	Translation: Protein modification and translation factors	ribosome recycling factor; rrf	0.3456	0.6064	0.074	-0.362	0.4909	0.0425	1.555	0	-1	0	0	0	0	-1	3	BothEarlyAndLate
cce_0801	Translation: Ribosomal proteins	50s ribosomal protein L19; rpl19	-0.3585	-0.0396	0.7167	-0.6199	0.6765	0.8265	0.9247	0	0	-1	1	-1	-1	-1	3	BothEarlyAndLate
cce_1367	Translation: Ribosomal proteins	50S ribosomal protein L34; rpl34	-0.2457	0.1364	0.6063	-0.308	0.446	0.8591	0.675	0	0	-1	0	0	-1	-1	3	BothEarlyAndLate
cce_3151	Translation: Ribosomal proteins	50S ribosomal protein L35; rpl35	-0.2973	0.185	0.8277	-0.1718	0.7923	1.3523	1.314	0	0	-1	0	-1	-1	-1	3	BothEarlyAndLate
cce_3256	Translation: Ribosomal proteins	50S ribosomal protein L32; rpl32	-0.3847	-0.1129	0.9494	-0.0059	0.3342	0.12	0.6468	0	0	-1	0	0	0	-1	3	BothEarlyAndLate
cce_4013	Translation: Ribosomal proteins	50S ribosomal protein L3; rpl3	-0.396	0.2595	1.2233	-0.8877	1.1384	1.5082	1.2835	0	0	-1	1	-1	-1	-1	3	BothEarlyAndLate
cce_4015	Translation: Ribosomal proteins	50S ribosomal protein L4; rpl4	-0.2803	0.3706	1.0111	-0.4468	1.7527	1.6053	1.3496	0	0	-1	0	-1	-1	-1	3	BothEarlyAndLate
cce_4016	Translation: Ribosomal proteins	50S ribosomal protein L23; rpl23	-0.3047	0.2667	0.9448	-0.2691	1.846	1.6192	1.1851	0	0	-1	0	-1	-1	-1	3	BothEarlyAndLate
cce_4017	Translation: Ribosomal proteins	50S ribosomal protein L2; rpl2	-0.3702	-0.0269	0.8707	-0.4879	1.2629	1.0688	0.9249	0	0	-1	0	-1	-1	-1	3	BothEarlyAndLate
cce_4018	Translation: Ribosomal proteins	30S ribosomal protein S19; rps19	-0.3616	0.0364	0.6733	-0.4335	1.3704	1.2185	0.9328	0	0	-1	0	-1	-1	-1	3	BothEarlyAndLate
cce_4019	Translation: Ribosomal proteins	50S ribosomal protein L22; rpl22	-0.3654	0.1059	0.6299	-0.4855	1.4224	1.2426	0.8557	0	0	-1	0	-1	-1	-1	3	BothEarlyAndLate
cce_4020	Translation: Ribosomal proteins	30S ribosomal protein S3; rps3	-0.4865	-0.0791	0.6685	-0.4367	1.5751	1.2957	1.048	0	0	-1	0	-1	-1	-1	3	BothEarlyAndLate
cce_4027	Translation: Ribosomal proteins	50S ribosomal protein L5; rpl5	-0.3582	-0.0742	0.8026	-0.2093	1.3136	0.9837	0.5864	0	0	-1	0	-1	-1	-1	3	BothEarlyAndLate
cce_4028	Translation: Ribosomal proteins	30S ribosomal protein S8; rps8	-0.2867	-0.0981	0.7067	-0.3948	1.3733	1.0774	0.7432	0	0	-1	0	-1	-1	-1	3	BothEarlyAndLate
cce_4029	Translation: Ribosomal proteins	50S ribosomal protein L6; rpl6	-0.2978	-0.1193	0.5902	-0.2881	1.9098	1.2039	0.9256	0	0	-1	0	-1	-1	-1	3	BothEarlyAndLate
cce_4030	Translation: Ribosomal proteins	50S ribosomal protein L18; rpl18	-0.2456	-0.1103	0.6148	-0.2619	1.7639	1.0168	0.7184	0	0	-1	0	-1	-1	-1	3	BothEarlyAndLate
cce_4032	Translation: Ribosomal proteins	50S ribosomal protein L15; rpl15	-0.2389	-0.2828	0.7526	-0.8254	1.486	1.2208	0.6986	0	0	-1	1	-1	-1	-1	3	BothEarlyAndLate
cce_4222	Translation: Ribosomal proteins	50S ribosomal protein L25; rpl25	-0.1983	0.0301	0.8587	-0.5159	0.4167	0.6676	1.1374	0	0	-1	0	0	-1	-1	3	BothEarlyAndLate
cce_1222	Transport and binding proteins: Amino acids, peptides and amines	high-affinity nitrate/nitrite bispecific transporter; nrtP	1.6812	2.074	1.8057	2.8931	1.8082	2.4868	1.6609	-1	-1	-1	-1	-1	-1	-1	3	BothEarlyAndLate
cce_0302	Transport and binding proteins: Transport and binding proteins	bicarbontate transport system ATP-binding protein; cmpD	-0.1479	0.1225	-4.1	-0.2852	-0.7632	-4.1606	-0.2256	0	0	1	0	1	1	0	3	BothEarlyAndLate
cce_0303	Transport and binding proteins: Transport and binding proteins	bicarbontate transport system ATP-binding protein; cmpC	-0.5336	-0.0858	-4.5038	0.0399	0.0946	-4.7395	-0.2023	0	0	1	0	0	1	0	3	BothEarlyAndLate
cce_0304	Transport and binding proteins: Transport and binding proteins	bicarbontate transport system permease protein; cmpB	-0.5159	-0.0576	-4.3885	0.1623	0.1552	-3.78	-0.1291	0	0	1	0	0	1	0	3	BothEarlyAndLate
cce_0305	Transport and binding proteins: Transport and binding proteins	bicarbontate transport system substrate-binding protein; cmpA	-0.3068	-0.0672	-3.5076	0.0101	0.1756	-2.91	-0.0055	0	0	1	0	0	1	0	3	BothEarlyAndLate
cce_0388	Transport and binding proteins: Transport and binding proteins	cation transporter, P-type ATPase family, E1-E2 type	0.3373	-0.1232	-0.8113	-0.0705	0.077	-0.0989	-1.1779	0	0	1	0	0	0	1	3	BothEarlyAndLate
cce_0685	Transport and binding proteins: Transport and binding proteins	iron-sulfur assembly protein; sufB	-0.8201	-1.1899	0.2843	0.3812	-1.2045	-0.3016	-1.8819	1	1	0	0	1	0	1	3	BothEarlyAndLate
cce_0847	Transport and binding proteins: Transport and binding proteins	molybdenum ABC transporter, periplasmic binding protein; modA	-0.0942	0.1536	0.6065	1.2533	0.114	0.4037	0.584	0	0	-1	-1	0	0	0	3	BothEarlyAndLate
cce_1688	Transport and binding proteins: Transport and binding proteins	Na+/H+ antiporter	0.0004	0.5059	-1.5252	-0.5087	-0.6592	-2.5966	-0.349	0	0	1	0	0	1	0	3	BothEarlyAndLate
cce_1689	Transport and binding proteins: Transport and binding proteins	probable sulfate transporter	0.1065	0.5652	-1.7384	-0.0511	-0.1055	-2.8249	0.1207	0	0	1	0	0	1	0	3	BothEarlyAndLate
cce_2589	Transport and binding proteins: Transport and binding proteins	acriflavin resistance protein	0.2113	-0.8463	-0.5238	1.7756	0.3183	0.5744	0.3514	0	1	0	-1	0	0	0	3	BothEarlyAndLate
cce_2619	Transport and binding proteins: Transport and binding proteins	ABC transporter, substrate binding protein, possibly oligopeptides	-0.6213	-0.5083	-0.0942	0.6228	-0.0534	0.9938	0.0749	1	0	0	-1	0	-1	0	3	BothEarlyAndLate
cce_2801	Transport and binding proteins: Transport and binding proteins	ABC transporter, ATP-binding protein	-0.1516	-0.793	-0.2708	1.2258	0.7572	0.8394	1.0727	0	1	0	-1	-1	-1	-1	3	BothEarlyAndLate
cce_3679	Transport and binding proteins: Transport and binding proteins	putative cobalt ABC transporter permease protein; cbiQ2	0.0911	0.0817	0.6122	0.6939	1.0101	0.3931	1.0491	0	0	-1	-1	-1	0	-1	3	BothEarlyAndLate
cce_3700	Transport and binding proteins: Transport and binding proteins	ATP-binding protein of ABC transporter	0.1015	-0.6984	-0.8948	0.7898	-0.1831	0.3035	-0.0303	0	1	1	-1	0	0	0	3	BothEarlyAndLate
cce_3826	Transport and binding proteins: Transport and binding proteins	sulfate transport system ATP-binding protein; cysA	-0.0741	0.0188	-0.6823	0.5153	-0.0331	-0.5857	0.4345	0	0	1	0	0	1	0	3	BothEarlyAndLate
cce_3827	Transport and binding proteins: Transport and binding proteins	sulfate transport system permease protein; cysW	-0.3396	-0.0391	-0.7296	0.3368	0.1317	-0.59	0.3798	0	0	1	0	0	1	0	3	BothEarlyAndLate
cce_3828	Transport and binding proteins: Transport and binding proteins	sulfate transport system permease protein; cysT	-0.7998	-0.0238	-0.9234	0.3888	-0.0709	-0.6591	0.4505	1	0	1	0	0	1	0	3	BothEarlyAndLate
cce_3830	Transport and binding proteins: Transport and binding proteins	sulfate binding protein; sbpA	-1.1751	-0.067	-0.5083	0.2845	0.4112	-0.6439	0.3638	1	0	0	0	0	1	0	3	BothEarlyAndLate
cce_0035		hypothetical protein	-0.1273	-1.129	-1.0846	1.3219	0.8769	0.5036	1.3497	0	1	1	-1	-1	0	-1	3	BothEarlyAndLate
cce_0090		rfrA family pentapeptide repeat	-0.8986	-0.6832	-0.6953	1.08	-0.031	0.9322	0.7283	1	1	1	-1	0	-1	-1	3	BothEarlyAndLate
cce_0119		unknown; contains UPF0150	0.159	0.1876	0.6673	0.9732	-0.3282	-0.2018	-0.8924	0	0	-1	-1	0	0	1	3	BothEarlyAndLate
cce_0247		unknown; contains a Mechanosensitive ion channel, MscS domain	-0.2791	-0.8136	-0.2216	0.6901	-0.9656	-0.1794	-0.3474	0	1	0	-1	1	0	0	3	BothEarlyAndLate
cce_0259		unknown	0.6224	0.3938	-0.4468	-1.4137	-4.5619	-2.4793	-0.5164	-1	0	0	1	1	1	0	3	BothEarlyAndLate
cce_0339		UPF0047-containing protein	-0.3265	-0.6425	-0.043	0.8572	0.1947	0.2921	0.6465	0	1	0	-1	0	0	0	3	BothEarlyAndLate
cce_0340		unknown; contains DUF187	-0.4769	-0.8129	-0.0089	1.1842	0.3244	0.4624	0.9971	0	1	0	-1	0	0	-1	3	BothEarlyAndLate
cce_0432		hypothetical protein	-0.0789	-0.0712	0.708	1.7748	0.4323	-0.0057	0.4662	0	0	-1	-1	0	0	0	3	BothEarlyAndLate
cce_0433		conserved hypothetical protein	-0.6152	0.708	0.3126	-0.0131	-3.5459	-1.9614	-1.9192	1	-1	0	0	1	1	1	3	BothEarlyAndLate
cce_0453		putative transcriptional regulator AbrB	-0.0089	0.0994	1.2142	0.4972	0.5311	0.1648	0.6261	0	0	-1	0	0	0	-1	3	BothEarlyAndLate
cce_0469		conserved hypothetical protein	-0.1112	-0.1596	-0.8602	0.3566	0.6777	-0.2354	0.519	0	0	1	0	-1	0	0	3	BothEarlyAndLate
cce_0477		hypothetical protein; contains a Thioredoxin fold domain	-0.6793	-0.7912	-0.0465	0.7841	1.4873	1.3388	-0.4571	1	1	0	-1	0	-1	0	3	BothEarlyAndLate
cce_0478		conserved hypothetical protein	-0.7856	-1.0281	-0.1579	0.2934	2.5382	1.5456	-0.002	1	1	0	0	-1	-1	0	3	BothEarlyAndLate
cce_0480		hypothetical protein; contains a rare lipoprotein A domain	-0.0518	-1.1778	0.6208	0.3706	-0.3702	1.0567	0.0714	0	1	-1	0	0	-1	0	3	BothEarlyAndLate
cce_0495		hypothetical protein	0.1068	-0.3466	0.7322	0.8483	-0.5223	-0.0174	0.1897	0	0	-1	-1	0	0	0	3	BothEarlyAndLate
cce_0496		hypothetical protein	-0.3102	-0.7342	-0.2349	0.9849	0.1572	-0.1905	0.3864	0	1	0	-1	0	0	0	3	BothEarlyAndLate
cce_0526		unknown; contains a methyltransferase FkbM domain	-0.7791	0.2871	-0.2262	0.3739	0.2105	0.5962	0.6588	1	0	0	0	0	-1	-1	3	BothEarlyAndLate
cce_0527		unknown	-0.7791	0.3788	0.2169	0.2938	-0.0019	0.5953	0.4969	1	0	0	0	0	-1	0	3	BothEarlyAndLate
cce_0528		hypothetical protein	-0.6728	0.4673	0.5095	0.0895	-0.0071	0.6379	0.2948	1	0	0	0	0	-1	0	3	BothEarlyAndLate
cce_0550		conserved hypothetical protein	-0.6431	-0.1305	-0.0222	0.0129	2.8717	-0.0532	3.8959	1	0	0	0	-1	0	-1	3	BothEarlyAndLate
cce_0551		hypothetical protein	-0.5972	-0.2424	-0.0104	-0.0707	2.933	-0.3991	3.9214	1	0	0	0	-1	0	-1	3	BothEarlyAndLate
cce_0552		conserved hypothetical protein	-0.2758	0.0644	0.6166	-0.2586	2.827	-0.5346	3.1924	0	0	-1	0	-1	0	-1	3	BothEarlyAndLate
cce_0555		hypothetical protein	-0.9436	-0.5276	-0.2835	1.1423	2.7926	0.0696	3.3621	1	0	0	-1	-1	0	-1	3	BothEarlyAndLate
cce_0586		unknown	0.2279	0.0726	0.8564	1.0549	0.5441	-0.1893	0.8723	0	0	-1	-1	0	0	0	3	BothEarlyAndLate
cce_0598		unknown; contains an S-layer homology (SLH) domain	-0.371	-0.409	-0.8994	1.6459	0.1176	0.6362	0.63	0	0	1	-1	0	-1	-1	3	BothEarlyAndLate
cce_0605		protein involved in constitutive low affinity CO2 uptake; cupA	0.1598	0.3906	-2.8079	0.0703	0.3754	-2.4613	0.4607	0	0	1	0	0	1	0	3	BothEarlyAndLate
cce_0607		putative ribonuclease H	0.0776	0.0622	0.8107	0.5975	-0.289	0.5217	0.2284	0	0	-1	-1	0	0	0	3	BothEarlyAndLate
cce_0683		putative transcriptional regulator	-0.2889	-0.6197	-0.5333	-0.4337	-0.7778	-0.1204	-1.1026	0	1	0	0	1	0	1	3	BothEarlyAndLate
cce_0684		hypothetical protein	-0.6666	-0.9773	0.1479	-0.0306	-1.3076	-0.7789	-1.3648	1	1	0	0	0	1	0	3	BothEarlyAndLate
cce_0710		unknown	0.8366	0.7422	-0.1661	-0.6981	-0.1185	-1.6797	1.2147	-1	-1	0	1	0	1	-1	3	BothEarlyAndLate
cce_0765		hypothetical protein	-0.1189	0.0092	0.7495	0.9456	0.2818	0.707	1.0903	0	0	-1	-1	0	-1	-1	3	BothEarlyAndLate
cce_0778		unknown; contains a Ferritin/ribonucleotide reductase-like domain	-0.0416	0.2728	0.6498	0.338	-0.2394	0.9861	0.025	0	0	-1	0	0	-1	0	3	BothEarlyAndLate
cce_0795		unknown; contains a peptidase M48, Ste24p domain	-0.0533	-1.0084	-0.8387	0.9169	0.7886	0.8287	1.1376	0	1	1	-1	-1	-1	-1	3	BothEarlyAndLate
cce_0826		unknown	0.1977	0.1264	0.6131	0.8802	0.5231	-0.2641	1.2592	0	0	-1	-1	0	0	-1	3	BothEarlyAndLate
cce_0854		hypothetical protein	-0.2174	0.514	0.7671	1.1008	0.2046	-0.2236	0.6443	0	0	-1	-1	0	0	-1	3	BothEarlyAndLate
cce_0859		hypothetical protein	-0.0822	-1.3248	-1.7166	2.0085	0.5165	-0.0421	0.8252	0	1	1	-1	0	0	-1	3	BothEarlyAndLate
cce_0896		DUF360-containing protein	0.1924	0.2144	0.7303	1.2657	-1.1294	1.004	-0.7236	0	0	-1	-1	1	-1	1	3	BothEarlyAndLate
cce_0903		hypothetical protein	-0.0521	0.2268	0.8198	0.6938	-0.2299	-0.0596	0.2846	0	0	-1	-1	0	0	0	3	BothEarlyAndLate
cce_1005		putative iron-sulfur assembly protein; sufD	-0.7261	-0.7226	0.0466	0.6443	-0.475	-0.1129	-1.6503	1	1	0	-1	0	0	1	3	BothEarlyAndLate
cce_1048		hypothetical protein; contains a Mo-dependent nitrogenase, C-terminal domain	-0.5503	-0.7351	-1.9009	-0.4411	0.5999	-1.5216	0.7249	0	1	1	0	0	1	0	3	BothEarlyAndLate
cce_1049		NDH-1S subunit, CO2 uptake Small protein; cupS	-0.2888	-0.0063	-1.1581	-0.6783	1.3154	-0.3515	0.9582	0	0	1	1	-1	0	-1	3	BothEarlyAndLate
cce_1128		unknown	0.4059	0.981	0.4729	1.0149	1.1172	1.3213	-1.2358	0	-1	0	-1	-1	-1	1	3	BothEarlyAndLate
cce_1129		hypothetical protein	-0.599	-0.0624	0.2208	1.1208	0.6215	0.648	1.0993	1	0	0	-1	-1	-1	-1	3	BothEarlyAndLate
cce_1220		hypothetical protein	1.6378	1.7557	1.3175	2.3233	0.8533	2.3739	0.9616	-1	-1	-1	-1	-1	-1	-1	3	BothEarlyAndLate
cce_1294		conserved hypothetical protein	-0.2555	1.1512	0.4086	-1.6734	-0.8635	0.1183	1.4951	0	-1	0	1	1	0	-1	3	BothEarlyAndLate
cce_1315		conserved hypothetical protein	-0.5478	0.0021	0.5877	0.5704	0.1467	1.4574	0.8462	0	0	-1	0	0	-1	-1	3	BothEarlyAndLate
cce_1433		hypothetical protein	-0.0154	0.3521	0.6328	0.951	0.0998	0.2529	0.2454	0	0	-1	-1	0	0	0	3	BothEarlyAndLate
cce_1461		unknown	0.2782	0.2491	0.6589	1.1223	1.0136	0.4165	0.6768	0	0	-1	-1	-1	0	-1	3	BothEarlyAndLate
cce_1464		hypothetical protein	-0.1792	-1.2058	0.0301	1.6245	-0.8082	-0.6338	0.3338	0	1	0	-1	1	1	0	3	BothEarlyAndLate
cce_1483		hypothetical protein; contains a MscS Mechanosensitive ion channel domain	0.1601	0.4116	1.2612	0.2478	0.1658	1.3672	0.5671	0	0	-1	0	0	-1	0	3	BothEarlyAndLate
cce_1532		hypothetical protein	-1.0154	-0.1714	0.9848	1.5658	0.3407	1.3048	2.5495	1	0	-1	-1	0	-1	-1	3	BothEarlyAndLate
cce_1537		unknown	-1.1168	-1.5239	-3.4514	0.535	0.7759	-0.942	0.6637	1	1	1	0	-1	1	-1	3	BothEarlyAndLate
cce_1538		unknown; contains a glycosyl transferase, family 39 domain	-0.7096	-0.2718	-0.2491	0.709	-0.0402	0.7304	0.4694	1	0	0	-1	0	-1	0	3	BothEarlyAndLate
cce_1543		putative CAB/ELIP/HLIP superfamily protein	-0.6578	-0.4299	0.4313	0.9274	-0.4088	1.1855	0.4212	1	0	0	-1	0	-1	0	3	BothEarlyAndLate
cce_1547		conserved hypothetical protein	-0.2487	1.3633	0.2854	-0.8093	-1.6362	1.0737	1.314	0	-1	0	1	1	-1	-1	3	BothEarlyAndLate
cce_1563		unknown	-0.2252	0.0806	-0.6049	-0.3774	-0.7968	-0.7234	0.5331	0	0	1	0	1	1	0	3	BothEarlyAndLate
cce_1572		hypothetical protein	-0.1933	-1.4587	-1.2231	2.7499	2.0256	1.5087	2.8113	0	1	1	-1	-1	-1	-1	3	BothEarlyAndLate
cce_1573		hypothetical protein	-0.1495	-1.4419	-1.0379	2.7719	2.0036	1.4559	2.9457	0	1	1	-1	-1	-1	-1	3	BothEarlyAndLate
cce_1574		hypothetical protein	-0.272	-1.6446	-1.2137	2.8828	1.571	1.3646	2.6243	0	1	1	-1	-1	-1	-1	3	BothEarlyAndLate
cce_1575		hypothetical protein	-0.2868	-1.4412	-0.9864	2.4256	0.968	0.8569	1.6809	0	1	1	-1	-1	-1	-1	3	BothEarlyAndLate
cce_1576		hypothetical protein	-0.2237	-1.4206	-1.0959	2.338	0.2827	0.3835	1.0932	0	1	1	-1	0	0	-1	3	BothEarlyAndLate
cce_1644		conserved hypothetical protein	0.6408	0.2639	-0.5008	-0.297	-1.2944	-0.2736	-1.9662	-1	0	0	0	1	0	1	3	BothEarlyAndLate
cce_1646		hypothetical protein; contains a peptidase, archaeal and bacterial C-terminal domain	0.0407	0.0976	0.6186	0.7639	-0.6703	-0.015	-0.4608	0	0	-1	-1	1	0	0	3	BothEarlyAndLate
cce_1648		unknown	-0.066	0.498	0.7998	-0.5718	0.0295	0.6682	1.3297	0	0	-1	0	0	-1	-1	3	BothEarlyAndLate
cce_1649		unknown; contains a nuclear transport factor 2 domain	0.0204	-0.0823	-2.192	-0.7493	0.044	-0.9565	0.4645	0	0	1	1	0	1	0	3	BothEarlyAndLate
cce_1655		unknown	-0.0831	-1.1671	-1.1287	1.518	0.5113	0.646	0.3826	0	1	1	-1	0	-1	0	3	BothEarlyAndLate
cce_1656		hypothetical protein	-0.0566	-1.3873	-1.2187	1.7295	1.1193	0.616	0.7921	0	1	1	-1	-1	-1	-1	3	BothEarlyAndLate
cce_1664		hypothetical protein	-0.6438	-0.9174	-0.6606	0.2154	1.044	0.1884	0.801	1	1	1	0	-1	0	-1	3	BothEarlyAndLate
cce_1667		hypothetical protein	-0.1791	0.2289	0.7635	1.9595	-0.2156	-0.0622	0.0898	0	0	-1	-1	0	0	0	3	BothEarlyAndLate
cce_1707		unknown	0.4779	0.4357	1.8672	1.0722	1.0069	0.4298	1.0271	0	0	-1	-1	-1	0	-1	3	BothEarlyAndLate
cce_1720		hypothetical protein; contains a Peptidase aspartic, catalytic domain	-0.6246	-0.2224	-0.2844	1.0686	0.398	-0.4512	0.8102	1	0	0	-1	0	0	-1	3	BothEarlyAndLate
cce_1753		putative plastid and cyanobacterial ribosomal protein PSRP-3/Ycf65	-0.3484	-0.0838	0.9235	-0.6694	-0.0151	0.743	-0.565	0	0	-1	1	0	-1	0	3	BothEarlyAndLate
cce_1780		unknown	-0.5263	-0.8875	-0.5962	0.8267	0.2765	0.829	0.4696	0	1	1	-1	0	-1	0	3	BothEarlyAndLate
cce_1855		conserved hypothetical protein	0.2502	0.0486	0.7613	0.1995	0.7561	-0.1331	0.2317	0	0	-1	0	-1	0	0	3	BothEarlyAndLate
cce_1856		conserved hypothetical protein	0.4096	0.0514	0.9478	0.0752	0.6653	-0.3488	0.1538	0	0	-1	0	-1	0	0	3	BothEarlyAndLate
cce_1889		unknown	0.2008	0.6322	-0.2278	1.5023	-1.1134	-0.9998	-1.7439	0	-1	0	-1	1	1	1	3	BothEarlyAndLate
cce_1890		unknown	0.2294	0.777	-0.2668	1.935	-0.5594	-1.027	-0.9341	0	-1	0	-1	0	1	1	3	BothEarlyAndLate
cce_1930		hypothetical protein	-0.6257	0.3649	-0.0476	0.0111	0.0559	1.2801	0.0735	1	0	0	0	0	-1	0	3	BothEarlyAndLate
cce_2118		conserved hypothetical protein	-0.1287	-1.2753	-1.3631	1.0413	0.7169	0.4749	0.3973	0	1	1	-1	-1	0	0	3	BothEarlyAndLate
cce_2169		hypothetical protein; contains a TerC domain	0.0595	0.1773	0.6446	0.6892	-0.2428	0.7415	0.2689	0	0	-1	-1	0	-1	0	3	BothEarlyAndLate
cce_2205		hypothetical protein; contains a cell envelope-related transcriptional attenuator domain	-0.1682	-1.2593	-0.5445	0.7875	-0.5493	0.6741	0.3888	0	1	0	-1	0	-1	0	3	BothEarlyAndLate
cce_2212		hypothetical protein	-0.284	-1.5816	-0.7373	1.5709	0.9647	0.5102	1.5275	0	1	1	-1	-1	0	-1	3	BothEarlyAndLate
cce_2214		putative CAB/ELIP/HLIP family protein	-0.4033	-0.1072	0.6568	1.5885	0.0863	1.9959	1.7568	0	0	-1	-1	0	-1	-1	3	BothEarlyAndLate
cce_2225		phosphoketolase	-0.0077	-0.0622	-1.1144	-1.231	0.7277	-1.2054	0.4668	0	0	1	1	-1	1	0	3	BothEarlyAndLate
cce_2228		hypothetical protein	-0.6414	-0.0221	-0.4601	0.7408	-0.6544	0.4919	-0.2113	1	0	0	-1	1	0	0	3	BothEarlyAndLate
cce_2249		hypothetical protein; contains TPR_1 tetratricopeptide repeat domains	-0.1996	-0.2725	-0.8371	0.6529	0.3742	-0.2804	0.3007	0	0	1	-1	0	0	0	3	BothEarlyAndLate
cce_2398		hypothetical protein	0.737	0.8069	1.4997	1.4931	1.2018	1.8179	0.9052	-1	-1	-1	-1	-1	-1	0	3	BothEarlyAndLate
cce_2422		unknown	-0.1655	0.1628	1.0288	1.2906	0.0583	0.0222	-0.2271	0	0	-1	-1	0	0	0	3	BothEarlyAndLate
cce_2497		hypothetical protein; contains a phage integrase-like, catalytic core domain	0.4235	0.2286	-0.5882	-0.5156	-0.0068	0.1544	-1.3542	0	0	1	0	0	0	1	3	BothEarlyAndLate
cce_2516		DUF218-containing protein	-0.314	-0.8688	-0.577	0.3958	-0.0747	0.915	-0.5799	0	1	0	0	0	-1	0	3	BothEarlyAndLate
cce_2574		hypothetical protein	0.1024	0.3443	0.6373	0.3066	0.3605	0.7593	0.0907	0	0	-1	0	0	-1	0	3	BothEarlyAndLate
cce_2588		unknown	0.2694	-0.7562	-0.6384	1.2657	-0.2769	0.7708	0.394	0	1	1	-1	0	-1	0	3	BothEarlyAndLate
cce_2614		unknown; contains DUF552	-0.3908	-0.721	-0.8299	1.8363	-0.0742	1.0523	1.3077	0	1	1	-1	0	-1	-1	3	BothEarlyAndLate
cce_2626		unknown	-0.0838	-0.5434	-0.639	0.5493	0.4661	0.0482	0.683	0	0	1	0	0	0	-1	3	BothEarlyAndLate
cce_2635		hypothetical protein; contains a cupredoxin domain	-0.1836	0.0599	0.7282	0.7576	1.1945	0.8513	0.0358	0	0	-1	-1	-1	-1	0	3	BothEarlyAndLate
cce_2636		unknown	-0.1005	-0.1684	0.9223	1.1689	1.7635	1.5818	0.4806	0	0	-1	-1	-1	-1	0	3	BothEarlyAndLate
cce_2638		unknown	0.4011	0.0322	-0.5912	-1.8092	-4.3111	-1.1647	-1.953	0	0	1	1	1	1	1	3	BothEarlyAndLate
cce_2649		unknown; contains a cytochrome P450 domain	0.151	0.3929	-0.8288	-0.6633	-0.6446	-0.1117	-0.4041	0	0	1	1	1	0	0	3	BothEarlyAndLate
cce_2691		unknown	-0.4927	-0.6138	-0.0657	0.163	0.1473	0.8385	0.0508	0	1	0	0	0	-1	0	3	BothEarlyAndLate
cce_2708		rfrA family pentapeptide repeat	0.4235	0.723	0.1996	0.4762	-1.9171	0.4219	-2.6787	0	-1	0	0	1	0	1	3	BothEarlyAndLate
cce_2717		unknown; contains a radical SAM domain	-0.5322	-0.6007	-0.1116	0.742	-0.0068	-0.0784	0.8646	0	1	0	-1	0	0	-1	3	BothEarlyAndLate
cce_2754		unknown	-0.0499	-0.8965	-0.0468	0.9242	-0.3344	0.491	-0.0611	0	1	0	-1	0	0	0	3	BothEarlyAndLate
cce_2761		UPF0027-containing protein	-0.0059	0.27	0.6457	0.8078	-0.4003	-0.2223	0.2524	0	0	-1	-1	0	0	0	3	BothEarlyAndLate
cce_2802		hypothetical protein; contains a Protein kinase-like domain	-0.0805	-0.7089	-0.2785	1.4306	0.7827	0.6182	1.0983	0	1	0	-1	-1	-1	-1	3	BothEarlyAndLate
cce_2880		conserved hypothetical protein	-0.3619	-0.9593	-0.6873	1.3385	0.3425	1.1692	0.4213	0	1	1	-1	0	-1	0	3	BothEarlyAndLate
cce_2900		hypothetical protein	-0.7921	-0.0179	-0.193	0.0453	0.7369	0.2814	0.6276	1	0	0	0	-1	0	-1	3	BothEarlyAndLate
cce_2937		unknown	-0.1862	0.1968	-3.2977	-0.9094	0.9419	-3.407	-0.5283	0	0	1	1	-1	1	0	3	BothEarlyAndLate
cce_2938		hypothetical protein	-0.0653	0.0719	-3.556	-0.4053	-0.8144	-4.3209	-1.1849	0	0	1	0	1	1	1	3	BothEarlyAndLate
cce_2939		sodium dependent bicarbonate transporter; sbtA	-1.0942	-0.0456	-5.8225	-0.3258	0.2545	-5.941	-0.2859	1	0	1	0	0	1	0	3	BothEarlyAndLate
cce_2967		magnesium-protoporphyrin IX monomethyl ester aerobic oxidative cyclase	0.3598	1.0015	-0.3493	-1.2217	0.1654	0.1948	1.6645	0	-1	0	1	0	0	-1	3	BothEarlyAndLate
cce_3083		rfrA family pentapeptide repeat	-0.5838	-1.3825	-0.8659	2.0701	-1.2583	-0.2519	1.6443	0	1	1	-1	1	0	-1	3	BothEarlyAndLate
cce_3084		hypothetical protein	-0.5256	-1.5293	-1.0262	1.82	-1.4257	-0.421	1.4339	0	1	1	-1	1	0	-1	3	BothEarlyAndLate
cce_3128		unknown	-0.1043	1.2154	0.5918	0.8134	-0.4997	0.2613	0.6352	0	-1	-1	-1	0	0	-1	3	BothEarlyAndLate
cce_3140		unknown	-0.4088	-0.873	0.2057	1.2024	0.6161	0.7594	0.7473	0	1	0	-1	-1	-1	-1	3	BothEarlyAndLate
cce_3165		chaperonin-like protein RbcX; rbcX	-0.4509	-0.1876	-1.6731	-1.95	1.2334	-1.8155	2.1791	0	0	1	1	-1	1	-1	3	BothEarlyAndLate
cce_3187		conserved hypothetical protein	0.1021	0.4125	0.6071	1.128	0.3406	-0.4272	-0.372	0	0	-1	-1	0	0	0	3	BothEarlyAndLate
cce_3188		hypothetical protein	-0.2156	0.5842	1.2169	1.0153	-0.4639	-0.7466	0.0557	0	0	-1	-1	0	1	0	3	BothEarlyAndLate
cce_3189		unknown; contains DUF192	-0.2325	0.0187	0.6536	0.2736	-0.9384	-0.0806	-0.7089	0	0	-1	0	1	0	1	3	BothEarlyAndLate
cce_3203		hypothetical protein	0.6397	0.1363	-0.4348	-0.3794	-2.2137	-0.8963	-2.0912	-1	0	0	0	1	1	1	3	BothEarlyAndLate
cce_3210		unknown	-0.2301	-0.5087	-0.8769	0.8715	-0.1162	-0.6191	-0.1917	0	0	1	-1	0	0	0	3	BothEarlyAndLate
cce_3222		hypothetical protein	-0.9936	-0.0503	0.3314	1.2347	2.7852	1.3378	4.049	1	0	0	-1	-1	-1	-1	3	BothEarlyAndLate
cce_3230		unknown	0.1621	0.2253	0.6444	-0.0546	1.038	-0.3772	1.1515	0	0	-1	0	-1	0	-1	3	BothEarlyAndLate
cce_3268		unknown; contains a von Willebrand factor, type A domain	-0.1589	0.0242	1.1993	0.9666	-0.5161	0.0854	0.4018	0	0	-1	-1	0	0	0	3	BothEarlyAndLate
cce_3272		rfrA family pentapeptide repeat	-0.0771	0.6823	-0.157	-0.2284	-3.0004	-1.4769	-3.4494	0	-1	0	0	1	1	1	3	BothEarlyAndLate
cce_3288		unknown	0.1657	0.6904	0.0728	0.2966	-1.3976	0.782	-1.6186	0	-1	0	0	1	-1	1	3	BothEarlyAndLate
cce_3328		conserved hypothetical protein	-0.4811	-0.2736	-0.6057	-2.1022	-1.0431	-0.9197	-0.8453	0	0	1	1	1	1	1	3	BothEarlyAndLate
cce_3463		hypothetical protein	-0.3309	0.1322	0.8897	0.3518	-0.0066	0.5409	1.4917	0	0	-1	0	0	0	-1	3	BothEarlyAndLate
cce_3464		hypothetical protein	0.6051	0.3466	0.635	0.5969	0.303	-0.436	-1.4343	-1	0	-1	-1	0	0	1	3	BothEarlyAndLate
cce_3469		unknown; contains a beta-lactamase-like domain	0.3178	-0.0205	-0.5908	-1.2142	0.6164	-0.6083	0.1045	0	0	1	1	-1	1	0	3	BothEarlyAndLate
cce_3543		unknown; contains a sporulation related domain	-0.4273	-0.5921	-0.6996	1.0755	-0.1785	0.6832	0.3973	0	1	1	-1	0	-1	0	3	BothEarlyAndLate
cce_3548		hypothetical protein; contains a YiaAB two helix domain	0.1301	-1.1094	-1.169	1.3802	0.2361	-0.2212	1.0453	0	1	1	-1	0	0	-1	3	BothEarlyAndLate
cce_3560		hypothetical protein	0.3325	1.0894	0.6148	1.7745	1.444	0.5161	0.5914	0	-1	-1	-1	-1	0	-1	3	BothEarlyAndLate
cce_3561		rfrA family pentapeptide repeat	0.2832	0.918	0.3218	1.5891	0.8794	0.2866	0.3328	0	-1	0	-1	-1	0	0	3	BothEarlyAndLate
cce_3625		hypothetical protein; contains a ribbon-helix-helix domain	0.0912	0.3857	-0.6942	0.9881	-0.1776	0.6101	0.94	0	0	1	-1	0	-1	-1	3	BothEarlyAndLate
cce_3626		ATPase	0.1544	0.335	-0.9724	1.7206	0.3025	0.5355	1.207	0	0	1	-1	0	0	-1	3	BothEarlyAndLate
cce_3627		DUF1257-containing protein	0.4337	0.1405	-0.6724	1.2262	-0.6577	0.6358	0.3437	0	0	1	-1	1	-1	0	3	BothEarlyAndLate
cce_3636		hypothetical protein	-0.0977	-0.0188	0.671	-0.5284	-0.9036	0.7665	-0.1715	0	0	-1	0	1	-1	0	3	BothEarlyAndLate
cce_3670		hypothetical protein	-0.2537	0.6224	0.0324	0.3044	-3.2788	-0.7608	-2.4085	0	-1	0	0	1	1	1	3	BothEarlyAndLate
cce_3678		unknown	0.1441	0.175	0.6397	0.7305	1.2326	0.4411	1.0622	0	0	-1	-1	-1	0	-1	3	BothEarlyAndLate
cce_3687		unknown; contains a rare lipoprotein A, bacterial domain	-0.3691	0.2811	0.6992	0.0972	0.427	1.2555	0.7307	0	0	-1	0	0	-1	-1	3	BothEarlyAndLate
cce_3699		conserved hypothetical protein	0.1302	-0.3761	-0.8162	0.8121	-0.4692	0.2954	-0.3859	0	0	1	-1	0	0	0	3	BothEarlyAndLate
cce_3730		unknown	0.2928	0.1947	-1.0521	-0.338	-0.8571	-0.3293	-0.5911	0	0	1	0	1	0	1	3	BothEarlyAndLate
cce_3734		unknown	-0.4987	-0.3127	0.731	0.1303	-0.5078	0.1552	0.5932	0	0	-1	0	0	0	-1	3	BothEarlyAndLate
cce_3742		unknown	0.8325	0.3372	0.8999	0.6056	-0.165	-0.2777	-0.4314	-1	0	-1	-1	0	0	0	3	BothEarlyAndLate
cce_3776		unknown	-0.1901	-0.6072	0.0698	-0.2563	-0.1113	-0.721	0.132	0	1	0	0	0	1	0	3	BothEarlyAndLate
cce_3834		unknown	-1.1202	-0.7353	-5.1817	-0.4033	0.4237	-5.3548	0.2056	1	1	1	0	0	1	0	3	BothEarlyAndLate
cce_3836		putative HI0933-like protein	-0.6184	-0.2274	-2.0079	0.032	-0.0498	-2.4298	0.0639	1	0	1	0	0	1	0	3	BothEarlyAndLate
cce_3965		conserved hypothetical protein	-0.6249	-0.4013	-0.065	1.5137	-0.1521	0.1906	-0.1174	1	0	0	-1	0	0	0	3	BothEarlyAndLate
cce_3994		hypothetical protein; contains DUF204	-0.3566	-0.5993	-0.2641	0.2594	-0.0579	0.738	1.3015	0	1	0	0	0	-1	-1	3	BothEarlyAndLate
cce_4009		unknown	-0.2476	-1.1929	-0.8923	0.7847	-0.0257	0.5154	0.8323	0	1	1	-1	0	0	-1	3	BothEarlyAndLate
cce_4014		hypothetical protein	-0.3733	0.2738	1.0884	-0.6834	1.527	1.4513	1.5015	0	0	-1	1	-1	-1	-1	3	BothEarlyAndLate
cce_4026		hypothetical protein	-0.388	0.0456	0.8377	0.134	1.4099	1.1781	0.5203	0	0	-1	0	-1	-1	0	3	BothEarlyAndLate
cce_4050		hypothetical protein; contains an Acyl carrier protein-like domain	0.0136	0.6058	0.1433	0.8081	0.0484	0.4535	0.9534	0	-1	0	-1	0	0	-1	3	BothEarlyAndLate
cce_4128		unknown	-0.027	-1.3273	-1.0846	1.4487	1.371	1.0195	1.9826	0	1	1	-1	-1	-1	-1	3	BothEarlyAndLate
cce_4153		hypothetical protein	0.1261	0.0781	0.6144	0.972	0.467	-0.9797	0.3261	0	0	-1	-1	0	1	0	3	BothEarlyAndLate
cce_4155		hypothetical protein	-0.0159	0.1576	0.8399	1.3167	0.6014	0.6596	0.481	0	0	-1	-1	0	0	0	3	BothEarlyAndLate
cce_4206		hypothetical protein; contains a NLP/P60 domain	-0.9769	-1.2628	0.3592	0.9934	0.3494	0.535	0.1685	1	1	0	-1	0	0	0	3	BothEarlyAndLate
cce_4355		unknown	0.3211	0.6747	0.6246	-1.9632	-1.9397	0.1178	-2.5964	0	-1	-1	1	1	0	1	3	BothEarlyAndLate
cce_4367		hypothetical protein	-0.0835	0.247	-0.9013	-1.6557	-5.4433	-1.9712	-4.726	0	0	1	1	1	1	1	3	BothEarlyAndLate
cce_4369		conserved hypothetical protein	1.0956	0.8522	1.439	1.4587	0.9454	1.8382	0.7451	-1	-1	-1	-1	-1	-1	-1	3	BothEarlyAndLate
cce_4371		hypothetical protein	0.665	0.3609	0.7983	0.1297	0.2588	0.8064	-0.2071	-1	0	0	0	0	-1	0	3	BothEarlyAndLate
cce_4444		hypothetical protein	-0.5938	-0.1235	1.0185	0.3461	-0.7363	1.289	1.0745	1	0	-1	0	1	-1	-1	3	BothEarlyAndLate
cce_4445		conserved hypothetical protein	-0.3408	-0.0851	0.6782	-0.8428	-0.0706	0.1325	0.7762	0	0	-1	1	0	0	-1	3	BothEarlyAndLate
cce_4450		hypothetical protein	0.0905	0.0843	0.7856	1.3392	-0.1848	0.5421	0.5689	0	0	-1	-1	0	0	0	3	BothEarlyAndLate
cce_4451		hypothetical protein	-0.1002	-0.0448	0.8991	1.0793	0.1573	0.3119	0.4759	0	0	-1	-1	0	0	0	3	BothEarlyAndLate
cce_4452		conserved hypothetical protein	-0.0239	0.0179	0.9401	0.9023	0.0596	0.514	0.3309	0	0	-1	-1	0	0	0	3	BothEarlyAndLate
cce_4453		putative TatD DNase-like metal-dependent hydrolase	0.0871	0.0873	0.9471	0.8118	-0.0513	0.6678	0.2585	0	0	-1	-1	0	-1	0	3	BothEarlyAndLate
cce_4454		hypothetical protein; contains a UbiA prenyltransferase domain	0.2805	0.1864	0.8028	0.6814	0.0339	0.5765	0.055	0	0	-1	-1	0	0	0	3	BothEarlyAndLate
cce_4456		unknown	0.118	0.1395	0.6005	0.6289	-0.2845	0.4759	-0.1732	0	0	-1	-1	0	0	0	3	BothEarlyAndLate
cce_4514		hypothetical protein	-0.225	0.2446	0.7567	1.0886	0.8885	1.095	0.7323	0	0	-1	-1	-1	-1	-1	3	BothEarlyAndLate
cce_4610		hypothetical protein; contains a Mo-dependent nitrogenase, C-terminal domain	0.1091	-0.0262	0.6078	1.4269	0.3026	0.5194	-0.1816	0	0	-1	-1	0	0	0	3	BothEarlyAndLate
cce_4618		hypothetical protein	0.0278	0.0368	0.6741	-0.3358	0.9297	-0.2791	1.2304	0	0	-1	0	-1	0	-1	3	BothEarlyAndLate
cce_4630		hypothetical protein	0.0352	0.5956	0.0892	0.0634	-3.226	-0.7126	-2.8588	0	-1	0	0	1	1	1	3	BothEarlyAndLate
cce_4680		photosystem II protein Z; psbZ	0.5948	0.2655	0.1988	-0.5011	-0.7065	-0.0771	1.1188	-1	0	0	0	1	0	-1	3	BothEarlyAndLate
cce_4762		hypothetical protein	-0.2006	-0.0996	0.6353	0.3509	-0.5341	-0.0577	0.9652	0	0	-1	0	0	0	-1	3	BothEarlyAndLate
cce_4809		unknown	-0.0637	0.5843	0.6962	1.1082	-0.0765	-0.371	0.2876	0	0	-1	-1	0	0	0	3	BothEarlyAndLate
cce_4868		hypothetical protein	0.3694	-0.1583	-0.7926	-0.6394	-0.6961	-0.564	-0.6568	0	0	1	1	1	0	1	3	BothEarlyAndLate
cce_4869		unknown; contains an Excisionase/Xis, DNA-binding domain	0.3303	-0.0586	-0.9955	-0.6348	-0.4149	-0.5841	-0.262	0	0	1	1	0	0	0	3	BothEarlyAndLate
cce_4878		hypothetical protein	0.8725	0.2483	-0.7734	-1.2356	-1.5068	-1.3176	-1.4469	-1	0	1	1	1	1	1	3	BothEarlyAndLate
cce_4965		hypothetical protein	0.1705	-0.3992	-0.5948	-0.5599	-0.7057	-0.9576	-0.5927	0	0	1	0	1	1	1	3	BothEarlyAndLate
cce_4966		unknown	0.3191	-0.3925	-1.3018	-0.588	-0.6207	-1.1191	-0.648	0	0	1	1	1	1	1	3	BothEarlyAndLate
cce_4967		unknown; contains DUF497	0.2253	-0.3795	-1.071	-0.5353	-0.5823	-0.9484	-0.6199	0	0	1	0	0	1	1	3	BothEarlyAndLate
cce_5164		hypothetical protein	0.1183	-0.9399	-1.4206	1.2937	-0.4029	0.1536	0.2134	0	1	1	-1	0	0	0	3	BothEarlyAndLate
cce_5166		hypothetical protein	0.0978	0.6834	-0.5644	-1.6931	-1.3194	-0.8855	-1.5315	0	-1	0	1	1	1	1	3	BothEarlyAndLate
cce_5221		unknown; contains a ribbon-helix-helix domain	0.2474	-0.6939	-0.3362	-0.3496	0.0772	-0.6351	0.6169	0	1	0	0	0	1	-1	3	BothEarlyAndLate
cce_5254		unknown	0.412	-0.206	-0.7192	-0.4579	-0.4422	-0.4847	-0.755	0	0	1	0	0	0	1	3	BothEarlyAndLate
cce_5303		hypothetical protein	0.1305	0.1927	0.597	0.9104	0.062	0.7055	0.2344	0	0	-1	-1	0	-1	0	3	BothEarlyAndLate
cce_7005			-0.2925	0.1091	0.7816	-0.6776	-0.383	-0.2274	-0.1538	0	0	-1	1	0	0	0	3	BothEarlyAndLate
cce_0042	Amino acid biosynthesis: Aromatic amino acid family	histidinol-phosphate phosphatase, HAD-superfamily hydrolase subfamily IIIA	-0.0093	-0.6279	-0.2218	0.2756	-0.468	-0.3909	0.0595	0	1	0	0	0	0	0	1	OnlyDuringEarlyTimes
cce_3122	Amino acid biosynthesis: Aromatic amino acid family	3-dehydroquinate synthase; aroB3	0.5349	0.5983	0.0381	0.0386	0.1033	-0.4817	0.0405	0	-1	0	0	0	0	0	1	OnlyDuringEarlyTimes
cce_4455	Amino acid biosynthesis: Aromatic amino acid family	3-dehydroquinate synthase; aroB2	0.1245	0.1684	0.6552	0.503	0.0302	0.5165	0.1037	0	0	-1	0	0	0	0	1	OnlyDuringEarlyTimes
cce_0797	Biosynthesis of cofactors, prosthetic groups, and carriers: Pyridoxine	pyridoxamine 5'-phosphate oxidase; pdxH	-0.1688	0.0045	0.8934	0.1268	-0.4462	-0.2181	0.376	0	0	-1	0	0	0	0	1	OnlyDuringEarlyTimes
cce_3077	Fatty acid, phospholipid, and sterol metabolism: Fatty acid, phospholipid, and sterol metabolism	AMP-dependent synthetase and ligase, probable acyl-CoA synthase	0.1043	-0.0038	-0.7073	0.1495	-0.3731	0.1655	-0.1795	0	0	1	0	0	0	0	1	OnlyDuringEarlyTimes
cce_0923	Other categories: Drug and analog sensitivity	MRP protein-like protein	-0.1529	-0.9451	-0.2599	0.4796	0.4368	0.3545	0.3249	0	1	0	0	0	0	0	1	OnlyDuringEarlyTimes
cce_2998	Other categories: Drug and analog sensitivity	probable arsenate reductase; arsC	-0.0351	-0.4902	-2.3131	-0.4021	0.2267	-0.0214	0.3522	0	0	1	0	0	0	0	1	OnlyDuringEarlyTimes
cce_2999	Other categories: Drug and analog sensitivity	NADPH-dependent FMN reductase	0.0319	-0.4417	-2.1854	-0.3303	0.3595	0.1971	0.2992	0	0	1	0	0	0	0	1	OnlyDuringEarlyTimes
cce_2903	Other categories: Hydrogenase	hydrogenase accessory protein; hypB	0.2748	0.2684	0.6041	0.5419	-0.2384	-0.0684	-0.298	0	0	-1	0	0	0	0	1	OnlyDuringEarlyTimes
cce_0254	Other categories: Other	glycosyl transferase, group 1	-0.2531	0.0297	0.6106	0.2462	-0.057	0.093	0.3201	0	0	-1	0	0	0	0	1	OnlyDuringEarlyTimes
cce_2746	Other categories: Other	putative DoxX family protein	0.9955	0.6021	0.2768	0.0003	0.1346	-0.2475	0.0965	-1	-1	0	0	0	0	0	1	OnlyDuringEarlyTimes
cce_3865	Other categories: Transposon-related functions	transposase	0.0423	0.0446	0.6907	-0.1355	-0.156	0.0715	0.0744	0	0	-1	0	0	0	0	1	OnlyDuringEarlyTimes
cce_3522	Photosynthesis and respiration: NADH dehydrogenase	NADH dehydrogenase subunit 4; ndhD2	-0.5384	-0.5543	-1.2108	-0.0205	-0.4504	0.1119	-0.1712	0	0	1	0	0	0	0	1	OnlyDuringEarlyTimes
cce_1527	Purines, pyrimidines, nucleosides, and nucleotides: Pyrimidine ribonucleotide biosynthesis	orotidine 5'-phosphate decarboxylase; pyrF	-0.0779	0.177	0.8548	-0.1796	-0.6196	0.2895	0.3003	0	0	-1	0	0	0	0	1	OnlyDuringEarlyTimes
cce_3731	Regulatory functions: Regulatory functions	putative Rubisco transcriptional regulator, LysR family; rbcR	0.0366	0.1127	-0.9987	0.2925	0.0851	-0.422	0.047	0	0	1	0	0	0	0	1	OnlyDuringEarlyTimes
cce_1016	Transcription: Degradation of RNA	ribonuclease D; rnd	-0.2474	-0.2952	0.6816	0.2851	0.3915	0.1718	0.3048	0	0	-1	0	0	0	0	1	OnlyDuringEarlyTimes
cce_3666	Translation: Protein modification and translation factors	formylmethionine deformylase	0.0598	-0.1124	-0.6832	0.2876	0.1782	-0.108	-0.0824	0	0	1	0	0	0	0	1	OnlyDuringEarlyTimes
cce_0067	Transport and binding proteins: Transport and binding proteins	cation-transporting ATPase, E1-E2 type	-0.2751	-0.5404	-1.242	0.2147	0.067	-0.0949	-0.0553	0	0	1	0	0	0	0	1	OnlyDuringEarlyTimes
cce_0686	Transport and binding proteins: Transport and binding proteins	iron-sulfur assembly ATPase; sufC	-0.7528	-0.8165	0.8172	0.4401	-0.0365	0.1874	-0.1657	1	1	-1	0	0	0	0	1	OnlyDuringEarlyTimes
cce_1859	Transport and binding proteins: Transport and binding proteins	phosphate binding protein; ptsS1	-0.0134	-0.3267	-1.5532	-0.0896	0.0319	-0.0463	0.2097	0	0	1	0	0	0	0	1	OnlyDuringEarlyTimes
cce_1951	Transport and binding proteins: Transport and binding proteins	probable ferric uptake regulator; fur2	-0.2591	-0.6121	-0.0822	0.3032	-0.1677	0.4699	0.1403	0	1	0	0	0	0	0	1	OnlyDuringEarlyTimes
cce_3000	Transport and binding proteins: Transport and binding proteins	probable arsenical-resistance protein ACR3	0.0833	-0.2176	-1.6243	-0.3593	-0.073	-0.192	0.0341	0	0	1	0	0	0	0	1	OnlyDuringEarlyTimes
cce_0296		unknown	-0.1525	-0.6258	-0.6197	0.1203	-0.4172	-0.0465	-0.4304	0	0	1	0	0	0	0	1	OnlyDuringEarlyTimes
cce_0334		unknown	-0.2502	-0.7453	-0.439	0.3876	0.2802	-0.4065	0.4799	0	1	0	0	0	0	0	1	OnlyDuringEarlyTimes
cce_0525		unknown; contains a glycosyl transferase, family 2 domain	-0.7411	-0.0759	0.312	0.4049	-0.358	0.395	0.6121	1	0	0	0	0	0	0	1	OnlyDuringEarlyTimes
cce_0655		conserved hypothetical protein	-0.3811	-0.9288	-0.3535	0.3147	0.0594	0.1794	0.3599	0	1	0	0	0	0	0	1	OnlyDuringEarlyTimes
cce_0796		conserved hypothetical protein	0.0105	0.761	1.0297	0.303	-0.3587	0.169	-0.0993	0	-1	-1	0	0	0	0	1	OnlyDuringEarlyTimes
cce_1050		conserved hypothetical protein	-0.2354	-0.2315	-0.9723	-0.0037	0.2215	-0.4253	0.3936	0	0	1	0	0	0	0	1	OnlyDuringEarlyTimes
cce_1378		unknown	-0.0436	0.0025	0.5868	0.1277	0.0058	0.0219	0.332	0	0	-1	0	0	0	0	1	OnlyDuringEarlyTimes
cce_1518		hypothetical protein	0.0052	0.1695	0.6031	0.3309	-0.2378	-0.2376	0.583	0	0	-1	0	0	0	0	1	OnlyDuringEarlyTimes
cce_1557		rfrA family pentapeptide repeat	0.1169	0.4821	0.6537	-0.1971	0.0735	0.5526	0.2706	0	0	-1	0	0	0	0	1	OnlyDuringEarlyTimes
cce_1663		hypothetical protein	-0.6671	-0.8285	-0.4833	0.0268	0.0098	0.2072	0.2617	1	1	0	0	0	0	0	1	OnlyDuringEarlyTimes
cce_1860		hypothetical protein	-0.0449	-0.0952	-0.9453	-0.0859	0.1581	-0.052	0.0148	0	0	1	0	0	0	0	1	OnlyDuringEarlyTimes
cce_1868		hypothetical protein	0.0098	-0.4196	-0.7753	0.3295	0.1031	-0.0088	0.2209	0	0	1	0	0	0	0	1	OnlyDuringEarlyTimes
cce_1908		conserved hypothetical protein	-0.1617	-0.9438	-0.9709	0.4067	0.1523	0.2814	0.1074	0	1	1	0	0	0	0	1	OnlyDuringEarlyTimes
cce_1909		hypothetical protein	-0.0572	-0.8231	-0.8908	0.5579	0.2157	0.3936	0.1706	0	1	1	0	0	0	0	1	OnlyDuringEarlyTimes
cce_1965		hypothetical protein	-0.0599	-0.8227	0.2193	0.2189	-0.271	-0.565	0.2718	0	1	0	0	0	0	0	1	OnlyDuringEarlyTimes
cce_2084		putative macrophage migration inhibitory factor	-0.2626	0.1819	0.7878	0.2039	0.1525	0.5162	0.3341	0	0	-1	0	0	0	0	1	OnlyDuringEarlyTimes
cce_2119		hypothetical protein	-0.1429	-0.5814	-0.6579	0.2238	0.0286	-0.1633	-0.2279	0	0	1	0	0	0	0	1	OnlyDuringEarlyTimes
cce_2227		putative peptidase S66, LD-carboxypeptidase A	-1.2311	0.0765	-0.3247	0.5184	0.1175	0.4999	0.2198	1	0	0	0	0	0	0	1	OnlyDuringEarlyTimes
cce_2254		hypothetical protein	-0.6066	-0.4702	-0.8032	-0.0048	-0.1907	-0.5631	-0.0514	1	0	1	0	0	0	0	1	OnlyDuringEarlyTimes
cce_2456		hypothetical protein; contains a Glycosyl transferase, family 39 domain	-0.0117	0.0356	0.587	0.2162	0.1199	0.3812	0.3032	0	0	-1	0	0	0	0	1	OnlyDuringEarlyTimes
cce_3813		unknown	0.1251	0.2865	0.6286	0.212	0.3323	0.3081	-0.0138	0	0	-1	0	0	0	0	1	OnlyDuringEarlyTimes
cce_3829		conserved hypothetical protein	-1.1368	-0.0956	-0.8612	0.3584	-0.0057	-0.5502	0.1173	1	0	1	0	0	0	0	1	OnlyDuringEarlyTimes
cce_4349		hypothetical protein; contains a DNA polymerase, beta-like region domain	-0.091	-0.1156	0.6376	0.2083	0.5636	-0.569	0.3513	0	0	-1	0	0	0	0	1	OnlyDuringEarlyTimes
cce_4457		unknown; contains a Type I phosphodiesterase/nucleotide pyrophosphatase domain	-0.0369	-0.0748	0.597	0.2866	-0.1454	0.0329	0.1323	0	0	-1	0	0	0	0	1	OnlyDuringEarlyTimes
cce_4503		unknown	0.0139	-0.5112	-0.955	0.3456	-0.917	-0.2572	-0.8454	0	0	1	0	0	0	0	1	OnlyDuringEarlyTimes
cce_5143		hypothetical protein; contains low-density lipoprotein receptor YWTD repeat domains	0.574	0.9045	0.8385	0.3091	0.1323	-0.2856	0.3442	0	-1	-1	0	0	0	0	1	OnlyDuringEarlyTimes
cce_5163		hypothetical protein	0.1563	-0.5062	-1.0234	0.4182	-0.0333	0.1623	0.2151	0	0	1	0	0	0	0	1	OnlyDuringEarlyTimes
cce_5210		hypothetical protein	-0.1326	-0.4535	-0.6449	-0.0368	-0.3646	-0.2114	-0.4433	0	0	1	0	0	0	0	1	OnlyDuringEarlyTimes
cce_5218		hypothetical protein	-0.8516	-0.0387	-0.1211	-0.061	-0.0111	-0.0629	-0.1784	1	0	0	0	0	0	0	1	OnlyDuringEarlyTimes
cce_5268		hypothetical protein	-0.1097	-0.6585	-0.0257	0.3103	-0.126	0.138	0.2003	0	1	0	0	0	0	0	1	OnlyDuringEarlyTimes
cce_5298		hypothetical protein	-1.42	-0.99	-1.2623	0.2553	0.5178	-0.0556	0.5517	1	1	1	0	0	0	0	1	OnlyDuringEarlyTimes
cce_7001			-0.0953	0.1227	0.7211	0.1363	-0.2414	0.0209	-0.0891	0	0	-1	0	0	0	0	1	OnlyDuringEarlyTimes
cce_0263	Amino acid biosynthesis: Aromatic amino acid family	3-dehydroquinate dehydratase; aroQ	0.2826	0.0505	-0.2307	-0.0743	-1.1918	0.3191	-1.2212	0	0	0	0	1	0	1	2	OnlyDuringLaterTimePoints
cce_0829	Amino acid biosynthesis: Aromatic amino acid family	anthranilate phosphoribosyltransferase; trpD	0.0412	0.0827	-0.2783	-1.0568	0.371	0.0306	0.5842	0	0	0	1	0	0	0	2	OnlyDuringLaterTimePoints
cce_1168	Amino acid biosynthesis: Aromatic amino acid family	low molecular weight phosphotyrosine protein phosphatase	0.0243	0.1399	0.0479	-0.4958	0.838	0.4817	0.915	0	0	0	0	-1	0	-1	2	OnlyDuringLaterTimePoints
cce_1340	Amino acid biosynthesis: Aromatic amino acid family	anthranilate synthase component I; trpE1	-0.0615	0.1998	-0.2064	-0.7734	0.1842	-0.1091	0.5087	0	0	0	1	0	0	0	2	OnlyDuringLaterTimePoints
cce_2130	Amino acid biosynthesis: Aromatic amino acid family	tryptophan synthase alpha subunit; trpA	-0.1236	0.0104	0.1025	-0.5728	0.5863	0.0439	0.7107	0	0	0	0	0	0	-1	2	OnlyDuringLaterTimePoints
cce_2305	Amino acid biosynthesis: Aromatic amino acid family	indole-3-glycerol phosphate synthase; trpC	-0.147	0.057	0.3285	-0.424	0.7233	0.6983	1.0976	0	0	0	0	-1	-1	-1	2	OnlyDuringLaterTimePoints
cce_2887	Amino acid biosynthesis: Aromatic amino acid family	anthranilate synthase component II; trpG	0.1914	0.5195	0.0976	1.0259	0.0586	0.6763	0.3587	0	0	0	-1	0	-1	0	2	OnlyDuringLaterTimePoints
cce_3290	Amino acid biosynthesis: Aromatic amino acid family	imidazoleglycerol-phosphate dehydratase; hisB	0.1055	0.0954	0.1645	0.6114	0.0757	0.1766	0.0694	0	0	0	-1	0	0	0	2	OnlyDuringLaterTimePoints
cce_3766	Amino acid biosynthesis: Aromatic amino acid family	pyruvate/indolepyruvate decarboxylase	0.0147	0.1011	0.229	-0.3999	-0.735	-0.6517	-0.9563	0	0	0	0	0	0	1	2	OnlyDuringLaterTimePoints
cce_4140	Amino acid biosynthesis: Aromatic amino acid family	phosphoribosylformimino-5-aminoimidazole carboxamide ribotide isomerase; hisA	0.2974	0.1095	-0.4924	-0.9518	-2.0496	-0.5985	-2.366	0	0	0	1	0	1	1	2	OnlyDuringLaterTimePoints
cce_4249	Amino acid biosynthesis: Aromatic amino acid family	ATP phosphoribosyltransferase; hisG	0.2022	0.1397	-0.1325	0.2896	1.0021	0.3009	0.3071	0	0	0	0	-1	0	0	2	OnlyDuringLaterTimePoints
cce_4520	Amino acid biosynthesis: Aromatic amino acid family	histidinol dehydrogenase; hisD2	0.1902	-0.0025	-0.2814	0.153	-0.1994	0.305	-0.6186	0	0	0	0	0	0	1	2	OnlyDuringLaterTimePoints
cce_4637	Amino acid biosynthesis: Aromatic amino acid family	N-acetyl-glucosamine-6-phosphate deacetylase	0.0777	-0.0298	-0.2013	-0.6923	0.2966	-0.0481	-0.1815	0	0	0	1	0	0	0	2	OnlyDuringLaterTimePoints
cce_4666	Amino acid biosynthesis: Aromatic amino acid family	prephenate dehydratase; pheA	-0.0441	0.0368	0.083	0.2209	-0.396	0.1305	-0.7229	0	0	0	0	0	0	1	2	OnlyDuringLaterTimePoints
cce_0077	Amino acid biosynthesis: Aspartate family	5-methyltetrahydrofolate--homocysteine methyltransferase; metH	-0.1328	-0.0346	-0.223	-0.2714	0.7415	-0.2476	0.5363	0	0	0	0	-1	0	0	2	OnlyDuringLaterTimePoints
cce_1455	Amino acid biosynthesis: Aspartate family	threonine synthase; thrC1	-0.0111	-0.1006	-0.1531	-0.4056	-0.1457	-0.0652	-0.6409	0	0	0	0	0	0	1	2	OnlyDuringLaterTimePoints
cce_2446	Amino acid biosynthesis: Aspartate family	threonine synthase; thrC	-0.0142	0.1854	-0.1007	-0.0924	2.2756	0.5134	1.3321	0	0	0	0	-1	0	-1	2	OnlyDuringLaterTimePoints
cce_2693	Amino acid biosynthesis: Aspartate family	aspartate aminotransferase; aspC	0.1383	0.0381	-0.2324	-0.618	0.0653	0.1713	-0.3954	0	0	0	1	0	0	0	2	OnlyDuringLaterTimePoints
cce_2936	Amino acid biosynthesis: Aspartate family	dihydrodipicolinate reductase; dapB	-0.0623	-0.0407	0.168	-0.1881	0.7662	0.3624	0.7645	0	0	0	0	-1	0	-1	2	OnlyDuringLaterTimePoints
cce_4003	Amino acid biosynthesis: Aspartate family	asparagine synthetase; asnB	-0.0625	0.0775	0.2468	-0.5438	0.5782	-0.3038	0.6603	0	0	0	0	0	0	-1	2	OnlyDuringLaterTimePoints
cce_4146	Amino acid biosynthesis: Aspartate family	diaminopimelate epimerase; dapF	0.0435	0.0511	-0.1199	-0.4662	0.8595	-0.1026	0.4273	0	0	0	0	-1	0	0	2	OnlyDuringLaterTimePoints
cce_0248	Amino acid biosynthesis: Branched chain family	putative 2-isopropylmalate synthase/homocitrate synthase family protein	-0.0346	-0.0649	-0.0485	-0.4196	0.4039	-0.1495	-0.7546	0	0	0	0	0	0	1	2	OnlyDuringLaterTimePoints
cce_0628	Amino acid biosynthesis: Branched chain family	acetolactate synthase small subunit; ilvN	0.2669	-0.0084	-0.223	0.2297	-0.0427	0.0358	-0.7142	0	0	0	0	0	0	1	2	OnlyDuringLaterTimePoints
cce_2120	Amino acid biosynthesis: Branched chain family	ketol-acid reductoisomerase; ilvC	-0.3212	-0.0069	0.3496	-0.237	1.2074	0.273	1.4727	0	0	0	0	-1	0	-1	2	OnlyDuringLaterTimePoints
cce_2124	Amino acid biosynthesis: Branched chain family	1-deoxy-D-xylulose-5-phosphate reductoisomerase; dxr	0.14	0.1435	-0.1532	-1.1365	-0.2597	-0.4245	0.7689	0	0	0	1	0	0	-1	2	OnlyDuringLaterTimePoints
cce_3617	Amino acid biosynthesis: Branched chain family	3-isopropylmalate dehydrogenase; leuB	0.1354	-0.0282	-0.2511	-0.7602	0.3723	-0.3006	0.5507	0	0	0	1	0	0	0	2	OnlyDuringLaterTimePoints
cce_4008	Amino acid biosynthesis: Branched chain family	2-isopropylmalate synthase; leuA	0.1308	0.0062	-0.2679	0.0953	-0.1958	0.2111	-1.2483	0	0	0	0	0	0	1	2	OnlyDuringLaterTimePoints
cce_4400	Amino acid biosynthesis: Branched chain family	dihydroxyacid dehydratase; ilvD	0.2133	0.0862	-0.0439	-0.661	1.4056	0.1034	0.4859	0	0	0	1	-1	0	0	2	OnlyDuringLaterTimePoints
cce_4478	Amino acid biosynthesis: Branched chain family	acetolactate synthase; ilvG	0.0355	-0.1112	-0.0401	0.3123	0.8767	0.442	-0.4754	0	0	0	0	-1	0	0	2	OnlyDuringLaterTimePoints
cce_4582	Amino acid biosynthesis: Branched chain family	3-isopropylmalate dehydratase, small subunit; leuD	-0.1262	0.0163	-0.3452	-0.1962	0.6436	0.0766	0.2693	0	0	0	0	-1	0	0	2	OnlyDuringLaterTimePoints
cce_0395	Amino acid biosynthesis: Glutamate family / Nitrogen assimilation	nitrilase/cyanide hydratase and apolipoprotein N-acyltransferase	-0.169	-0.0769	-0.1284	-0.7138	1.0046	0.4152	0.8865	0	0	0	1	-1	0	-1	2	OnlyDuringLaterTimePoints
cce_0997	Amino acid biosynthesis: Glutamate family / Nitrogen assimilation	glutamate dehydrogenase; gdhA	0.0829	0.3774	-0.0089	-0.7682	-1.6546	-0.58	-0.4321	0	0	0	1	1	0	0	2	OnlyDuringLaterTimePoints
cce_1004	Amino acid biosynthesis: Glutamate family / Nitrogen assimilation	cysteine desulphurase; sufS	-0.4494	-0.3624	0.5458	0.0353	-0.3275	0.1685	-1.0718	0	0	0	0	0	0	1	2	OnlyDuringLaterTimePoints
cce_3094	Amino acid biosynthesis: Glutamate family / Nitrogen assimilation	N-acetylornithine aminotransferase; argD	0.0546	0.1745	0.14	0.6073	1.0666	0.5642	0.0469	0	0	0	-1	-1	0	0	2	OnlyDuringLaterTimePoints
cce_4353	Amino acid biosynthesis: Glutamate family / Nitrogen assimilation	ferredoxin-dependent glutamate synthase; glsF/gltB	0.383	0.217	-0.1608	0.8404	0.1816	-0.1527	-1.2492	0	0	0	-1	0	0	1	2	OnlyDuringLaterTimePoints
cce_4432	Amino acid biosynthesis: Glutamate family / Nitrogen assimilation	glutamine synthetase, glutamate--ammonia ligase; glnA	0.1899	0.5462	0.3003	0.6468	2.0616	0.7699	1.8349	0	0	0	-1	-1	-1	-1	2	OnlyDuringLaterTimePoints
cce_0210	Amino acid biosynthesis: Serine family / Sulfur assimilation	cysteine synthase	0.0092	-0.125	-0.4432	-0.9462	-0.2318	-0.4619	-0.6301	0	0	0	0	0	0	1	2	OnlyDuringLaterTimePoints
cce_1473	Amino acid biosynthesis: Serine family / Sulfur assimilation	cysteine synthase A; cysK/cysM	0.1159	-0.0595	0.3105	0.8811	0.7851	-0.0771	0.7423	0	0	0	-1	-1	0	-1	2	OnlyDuringLaterTimePoints
cce_3951	Amino acid biosynthesis: Serine family / Sulfur assimilation	glycine/serine hydroxymethyltransferase; glyA	0.0374	-0.0133	0.3087	0.3036	0.1912	0.4548	-1.4386	0	0	0	0	0	0	1	2	OnlyDuringLaterTimePoints
cce_3972	Amino acid biosynthesis: Serine family / Sulfur assimilation	adenylylsulfate kinase; cysC	-0.1745	0.3326	-0.031	-0.7074	-0.7058	-0.2814	0.7143	0	0	0	1	0	0	-1	2	OnlyDuringLaterTimePoints
cce_4658	Amino acid biosynthesis: Serine family / Sulfur assimilation	sulfate adenylyltransferase; met3	0.0302	0.4061	0.1666	-1.0157	0.0281	-0.0251	0.867	0	0	0	1	0	0	-1	2	OnlyDuringLaterTimePoints
cce_3516	Biosynthesis of cofactors, prosthetic groups, and carriers: Biotin	dethiobiotin synthase; bioD	0.1397	0.0718	-0.23	-0.681	-0.2425	-0.1434	-0.1092	0	0	0	1	0	0	0	2	OnlyDuringLaterTimePoints
cce_4350	Biosynthesis of cofactors, prosthetic groups, and carriers: Biotin	biotin synthetase; bioB	-0.1156	0.2993	-0.0082	-0.2573	0.7345	0.1407	0.9971	0	0	0	0	0	0	-1	2	OnlyDuringLaterTimePoints
cce_0877	Biosynthesis of cofactors, prosthetic groups, and carriers: Carotenoid	geranylgeranyl pyrophosphate synthase; crtE	0.255	0.1204	-0.3707	-1.242	0.9828	0.0146	0.6977	0	0	0	1	-1	0	-1	2	OnlyDuringLaterTimePoints
cce_2302	Biosynthesis of cofactors, prosthetic groups, and carriers: Carotenoid	undecaprenyl pyrophosphate synthetase; uppS1	-0.0166	-0.077	0.103	0.0812	0.0396	-1.2252	-0.1568	0	0	0	0	0	1	0	2	OnlyDuringLaterTimePoints
cce_2779	Biosynthesis of cofactors, prosthetic groups, and carriers: Carotenoid	zeta-carotene desaturase; crtQ	-0.1324	0.0984	-0.2397	-0.7709	1.4556	-0.0906	0.9648	0	0	0	1	-1	0	-1	2	OnlyDuringLaterTimePoints
cce_4278	Biosynthesis of cofactors, prosthetic groups, and carriers: Carotenoid	zeta-carotene desaturase; crtO	-0.0392	0.0907	-0.2312	0.1541	-0.3271	0.0057	-0.6542	0	0	0	0	0	0	1	2	OnlyDuringLaterTimePoints
cce_4622	Biosynthesis of cofactors, prosthetic groups, and carriers: Carotenoid	beta-carotene hydroxylase; crtR	0.0541	-0.0195	-0.1568	0.3193	0.4417	-0.0529	0.6563	0	0	0	0	0	0	-1	2	OnlyDuringLaterTimePoints
cce_0152	Biosynthesis of cofactors, prosthetic groups, and carriers: Cobalamin, heme, phycobilin and porphyrin	putative dTDP-4-dehydrorhamnose reductase	-0.1904	-0.3024	-0.1658	0.0927	0.6365	0.303	0.2573	0	0	0	0	-1	0	0	2	OnlyDuringLaterTimePoints
cce_0199	Biosynthesis of cofactors, prosthetic groups, and carriers: Cobalamin, heme, phycobilin and porphyrin	magnesium chelatase, ATPase subunit I; chlI	-0.1139	0.0115	-0.0943	0.0285	1.2338	0.3715	1.0739	0	0	0	0	-1	0	-1	2	OnlyDuringLaterTimePoints
cce_0315	Biosynthesis of cofactors, prosthetic groups, and carriers: Cobalamin, heme, phycobilin and porphyrin	magnesium-protoporphyrin O-methyltransferase; chlM	-0.2171	0.0211	0.038	-0.7787	1.2948	0.5236	0.9761	0	0	0	1	-1	0	-1	2	OnlyDuringLaterTimePoints
cce_0802	Biosynthesis of cofactors, prosthetic groups, and carriers: Cobalamin, heme, phycobilin and porphyrin	cob(I)alamin adenosyltransferase; cobO/cobP/btuR	-0.1981	-0.0801	0.206	-0.2347	-0.6212	-0.7297	-0.5329	0	0	0	0	1	1	0	2	OnlyDuringLaterTimePoints
cce_1074	Biosynthesis of cofactors, prosthetic groups, and carriers: Cobalamin, heme, phycobilin and porphyrin	magnesium chelatase, ATPase subunit D; chlD	-0.2358	-0.201	-0.0799	-1.3289	0.4434	-0.6421	1.1906	0	0	0	1	0	1	-1	2	OnlyDuringLaterTimePoints
cce_1981	Biosynthesis of cofactors, prosthetic groups, and carriers: Cobalamin, heme, phycobilin and porphyrin	cobalamin biosynthesis protein D; cbiD	-0.1136	0.0487	0.1156	0.0381	-0.201	0.0324	-0.7748	0	0	0	0	0	0	1	2	OnlyDuringLaterTimePoints
cce_2325	Biosynthesis of cofactors, prosthetic groups, and carriers: Cobalamin, heme, phycobilin and porphyrin	oxygen independent coprophorphyrinogen III oxidase 1; hemN	-0.0997	-0.2537	-0.0612	-1.7196	2.6554	-0.3094	1.6062	0	0	0	1	-1	0	-1	2	OnlyDuringLaterTimePoints
cce_2884	Biosynthesis of cofactors, prosthetic groups, and carriers: Cobalamin, heme, phycobilin and porphyrin	glyoxalase I; gloA	-0.2086	0.2291	0.2811	0.1859	-1.4259	0.6399	-1.239	0	0	0	0	1	-1	1	2	OnlyDuringLaterTimePoints
cce_2966	Biosynthesis of cofactors, prosthetic groups, and carriers: Cobalamin, heme, phycobilin and porphyrin	uroporphyrinogen decarboxylase; hemE	-0.0978	0.3924	-0.0672	-1.4538	-0.254	-0.3285	0.3893	0	0	0	1	0	0	0	2	OnlyDuringLaterTimePoints
cce_3201	Biosynthesis of cofactors, prosthetic groups, and carriers: Cobalamin, heme, phycobilin and porphyrin	coproporphyrinogen III oxidase, aerobic; hemF	0.0805	0.409	-0.2393	-1.1961	0.6701	-0.0319	0.9245	0	0	0	1	-1	0	-1	2	OnlyDuringLaterTimePoints
cce_3674	Biosynthesis of cofactors, prosthetic groups, and carriers: Cobalamin, heme, phycobilin and porphyrin	protoporphyrinogen oxidase; hemK	0.0681	0.1541	0.242	0.4994	-0.9281	0.4764	-0.4709	0	0	0	0	1	0	0	2	OnlyDuringLaterTimePoints
cce_3677	Biosynthesis of cofactors, prosthetic groups, and carriers: Cobalamin, heme, phycobilin and porphyrin	cobalamin (vitamin B12) biosynthesis; cbiM	0.1334	0.1186	0.4406	0.6319	0.8258	0.343	0.7973	0	0	0	-1	0	0	-1	2	OnlyDuringLaterTimePoints
cce_3969	Biosynthesis of cofactors, prosthetic groups, and carriers: Cobalamin, heme, phycobilin and porphyrin	precorrin-8X methylmutase; cbiC1/cobH1	0.017	0.1306	0.3371	0.8639	0.3335	0.171	0.5536	0	0	0	-1	0	0	0	2	OnlyDuringLaterTimePoints
cce_4095	Biosynthesis of cofactors, prosthetic groups, and carriers: Cobalamin, heme, phycobilin and porphyrin	unknown; contains UPF0004	0.0327	-0.2818	0.0199	1.7576	-0.7133	0.2869	0.4425	0	0	0	-1	1	0	0	2	OnlyDuringLaterTimePoints
cce_4122	Biosynthesis of cofactors, prosthetic groups, and carriers: Cobalamin, heme, phycobilin and porphyrin	chlorophyll a synthase; chlG	-0.0104	0.0869	0.3337	-1.1722	-0.4219	-0.606	0.8068	0	0	0	1	0	1	-1	2	OnlyDuringLaterTimePoints
cce_4268	Biosynthesis of cofactors, prosthetic groups, and carriers: Cobalamin, heme, phycobilin and porphyrin	precorrin decarbocylase; cbiT/cobL	0.1458	0.1006	-0.2066	-0.6983	-0.1221	0.2407	-0.2614	0	0	0	1	0	0	0	2	OnlyDuringLaterTimePoints
cce_4378	Biosynthesis of cofactors, prosthetic groups, and carriers: Cobalamin, heme, phycobilin and porphyrin	porphobilinogen deaminase; hemC	0.0076	0.4414	0.014	-0.5931	0.3737	0.2186	0.5272	0	0	0	1	0	0	0	2	OnlyDuringLaterTimePoints
cce_4532	Biosynthesis of cofactors, prosthetic groups, and carriers: Cobalamin, heme, phycobilin and porphyrin	light-independent protochlorophyllide reductase iron protein subunit; chlL	0.0355	0.3735	-0.1712	-1.662	-0.5809	-1.43	0.7132	0	0	0	1	0	1	-1	2	OnlyDuringLaterTimePoints
cce_4752	Biosynthesis of cofactors, prosthetic groups, and carriers: Cobalamin, heme, phycobilin and porphyrin	cobaltochelatase; cobN	0.0137	-0.1026	-0.038	-0.7662	-0.1917	-0.5236	-0.0802	0	0	0	1	0	0	0	2	OnlyDuringLaterTimePoints
cce_4757	Biosynthesis of cofactors, prosthetic groups, and carriers: Cobalamin, heme, phycobilin and porphyrin	bifunctional cobalbumin biosynthesis enzyme; cobU/cobP	0.2005	0.0961	0.364	0.6277	0.5573	0.4104	0.4643	0	0	0	-1	0	0	0	2	OnlyDuringLaterTimePoints
cce_3143	Biosynthesis of cofactors, prosthetic groups, and carriers: Lipoate	lipoate synthetase; lipA2	0.0568	0.0972	-0.2004	-0.6394	-0.3506	-0.2138	0.0365	0	0	0	1	0	0	0	2	OnlyDuringLaterTimePoints
cce_0831	Biosynthesis of cofactors, prosthetic groups, and carriers: Menaquinone and ubiquinone	naphthoate synthase; menB	0.0114	0.0606	-0.1062	-0.8239	0.7149	0.1007	0.403	0	0	0	1	-1	0	0	2	OnlyDuringLaterTimePoints
cce_0097	Biosynthesis of cofactors, prosthetic groups, and carriers: Molybdopterin	putative molybdopterin-guanine dinucleotide biosynthesis protein A	-0.0509	-0.0239	0.22	0.7659	-0.2338	-0.0947	0.2286	0	0	0	-1	0	0	0	2	OnlyDuringLaterTimePoints
cce_1902	Biosynthesis of cofactors, prosthetic groups, and carriers: Molybdopterin	molybdenum cofactor biosynthesis protein A; moaA	-0.1351	-0.1128	-0.1791	0.2288	-0.179	-0.0066	-1.2613	0	0	0	0	0	0	1	2	OnlyDuringLaterTimePoints
cce_4198	Biosynthesis of cofactors, prosthetic groups, and carriers: Molybdopterin	molybdopterin biosynthesis protein moeA	0.1722	0.1104	0.0945	0.048	-0.543	0.0031	-0.8066	0	0	0	0	0	0	1	2	OnlyDuringLaterTimePoints
cce_2758	Biosynthesis of cofactors, prosthetic groups, and carriers: Nicotinate and nicotinamide	nicotinate-nucleotide adenylyltransferase; nadD	-0.1259	-0.0087	-0.1277	0.0814	-0.9259	-0.0325	-0.7256	0	0	0	0	1	0	1	2	OnlyDuringLaterTimePoints
cce_4420	Biosynthesis of cofactors, prosthetic groups, and carriers: Others	dihydroneopterin aldolase; folB	-0.064	-0.1613	-0.0473	-0.781	0.2373	-0.2757	0.2937	0	0	0	1	0	0	0	2	OnlyDuringLaterTimePoints
cce_2059	Biosynthesis of cofactors, prosthetic groups, and carriers: Pantothenate	bifunctional phosphopantothenoylcysteine decarboxylase/phosphopantothenate--cysteine ligase	0.0485	-0.096	-0.2192	-0.8618	-0.7293	-0.0399	-0.8522	0	0	0	1	1	0	1	2	OnlyDuringLaterTimePoints
cce_3300	Biosynthesis of cofactors, prosthetic groups, and carriers: Pyridoxine	pyridoxal phosphate biosynthetic protein; pdxJ	-0.1978	-0.0081	0.3057	-0.386	0.8396	0.501	0.6668	0	0	0	0	-1	0	-1	2	OnlyDuringLaterTimePoints
cce_3716	Biosynthesis of cofactors, prosthetic groups, and carriers: Quinolinate	quinolinate synthetase A; nadA	0.045	0.0777	0.1437	1.3452	0.0736	1.4859	-0.8191	0	0	0	-1	0	-1	1	2	OnlyDuringLaterTimePoints
cce_3935	Biosynthesis of cofactors, prosthetic groups, and carriers: Riboflavin	GTP cyclohydrolase I; folE1	-0.0138	-0.222	-0.1881	-1.1188	0.3861	0.9137	0.0529	0	0	0	1	0	-1	0	2	OnlyDuringLaterTimePoints
cce_0307	Biosynthesis of cofactors, prosthetic groups, and carriers: Thiamine	bifunctional glycine oxidase/thiamine biosynthesis protein; thiOG	-0.0252	-0.109	-0.1661	-0.726	0.2926	-0.1571	-0.3833	0	0	0	1	0	0	0	2	OnlyDuringLaterTimePoints
cce_3025	Biosynthesis of cofactors, prosthetic groups, and carriers: Thiamine	thiamine biosynthesis protein; thiC	0.4744	0.1646	-0.2895	-0.3247	0.3638	0.9205	-0.4229	0	0	0	0	0	-1	0	2	OnlyDuringLaterTimePoints
cce_4686	Biosynthesis of cofactors, prosthetic groups, and carriers: Thiamine	thiamine phosphate pyrophosphorylase; thiE	-0.0629	-0.0141	0.1567	0.6131	0.3506	-0.0757	0.1799	0	0	0	-1	0	0	0	2	OnlyDuringLaterTimePoints
cce_0174	Biosynthesis of cofactors, prosthetic groups, and carriers: Thioredoxin, glutaredoxin, and glutathione	glutathione S-transferase; gst1	0.3625	-0.0504	0.0979	0.7961	-0.199	1.0283	-0.3637	0	0	0	-1	0	-1	0	2	OnlyDuringLaterTimePoints
cce_0490	Biosynthesis of cofactors, prosthetic groups, and carriers: Thioredoxin, glutaredoxin, and glutathione	glutathione synthetase; gshB	0.0569	-0.0588	0.0495	-0.5337	1.0974	0.5088	0.3104	0	0	0	0	-1	0	0	2	OnlyDuringLaterTimePoints
cce_1175	Biosynthesis of cofactors, prosthetic groups, and carriers: Thioredoxin, glutaredoxin, and glutathione	Membrane-associated proteins in eicosanoid and glutathione metabolism (MAPEG) family	0.3734	0.4604	0.0201	0.4891	-0.86	0.3538	0.0265	0	0	0	0	1	0	0	2	OnlyDuringLaterTimePoints
cce_1588	Biosynthesis of cofactors, prosthetic groups, and carriers: Thioredoxin, glutaredoxin, and glutathione	glutathione dependent formaldehyde dehydrogenase	0.1941	0.0519	-0.0548	-0.6075	0.2786	0.1929	0.6701	0	0	0	1	0	0	-1	2	OnlyDuringLaterTimePoints
cce_1810	Biosynthesis of cofactors, prosthetic groups, and carriers: Thioredoxin, glutaredoxin, and glutathione	glutaredoxin-related protein	0.0222	0.1935	-0.0142	0.7291	0.6457	0.8616	1.4747	0	0	0	-1	-1	-1	-1	2	OnlyDuringLaterTimePoints
cce_3154	Biosynthesis of cofactors, prosthetic groups, and carriers: Thioredoxin, glutaredoxin, and glutathione	ferredoxin thioredoxin reductase, variable chain; ftrV	-0.0681	0.2483	0.0144	-1.4121	-0.492	-0.734	1.6274	0	0	0	1	0	1	-1	2	OnlyDuringLaterTimePoints
cce_3988	Biosynthesis of cofactors, prosthetic groups, and carriers: Thioredoxin, glutaredoxin, and glutathione	thioredoxin; trxA2	-0.0616	-0.2603	0.0719	-0.6087	-0.0877	-0.5149	0.3404	0	0	0	1	0	0	0	2	OnlyDuringLaterTimePoints
cce_4626	Biosynthesis of cofactors, prosthetic groups, and carriers: Thioredoxin, glutaredoxin, and glutathione	glutathione reductase; gor	0.2814	0.3646	0.221	0.3156	1.0812	0.2352	0.644	0	0	0	0	-1	0	-1	2	OnlyDuringLaterTimePoints
cce_4701	Biosynthesis of cofactors, prosthetic groups, and carriers: Thioredoxin, glutaredoxin, and glutathione	glutathione S-transferase; gst3	0.0003	-0.0197	0.1008	0.6479	0.7771	0.1534	0.105	0	0	0	-1	-1	0	0	2	OnlyDuringLaterTimePoints
cce_0054	Cell envelope: Membranes, lipoproteins, and porins	polipoprotein diacylglyceryltransferase; lgt	-0.1553	-0.1735	-0.3007	0.3441	-0.8793	-0.102	-1.0772	0	0	0	0	1	0	1	2	OnlyDuringLaterTimePoints
cce_0319	Cell envelope: Membranes, lipoproteins, and porins	putative S-layer OprB family carbohydrate-selective porin	-0.1803	-0.0137	-0.0506	-0.5441	-1.4284	-1.2025	-1.1457	0	0	0	0	1	1	1	2	OnlyDuringLaterTimePoints
cce_1317	Cell envelope: Membranes, lipoproteins, and porins	4-diphosphocytidyl-2-C-methyl-D-erythritol kinase; ispE	-0.2861	0.0896	0.1318	-0.7334	-0.1646	-0.3606	0.8581	0	0	0	1	0	0	-1	2	OnlyDuringLaterTimePoints
cce_2287	Cell envelope: Membranes, lipoproteins, and porins	unknown; contains an S-layer homology (SLH) domain	0.5535	0.5271	0.4774	0.6505	-0.5731	0.1094	-0.1333	0	0	0	-1	0	0	0	2	OnlyDuringLaterTimePoints
cce_0133	Cell envelope: Murein sacculus and peptidoglycan	cell wall hydrolase/autolysin family protein	0.2051	0.2025	0.1903	0.3387	-1.0438	0.0173	-0.3566	0	0	0	0	1	0	0	2	OnlyDuringLaterTimePoints
cce_0240	Cell envelope: Murein sacculus and peptidoglycan	UDP-N-acetylmuramoylalanine-D-glutamate ligase; murD	-0.0989	0.0923	0.0794	-0.4537	0.3523	-0.3448	0.7916	0	0	0	0	0	0	-1	2	OnlyDuringLaterTimePoints
cce_0401	Cell envelope: Murein sacculus and peptidoglycan	UDP-N-acetylglucosamine 1-carboxyvinyltransferase; murA	-0.1481	-0.1648	-0.3682	1.1568	-1.0032	0.5484	0.3261	0	0	0	-1	1	0	0	2	OnlyDuringLaterTimePoints
cce_0818	Cell envelope: Murein sacculus and peptidoglycan	UDP-N-acetylmuramoylalanyl-D-glutamate--2,6-diaminopimelate ligase; murE	-0.3639	0.1278	-0.0048	-0.0162	0.2415	0.6026	0.3294	0	0	0	0	0	-1	0	2	OnlyDuringLaterTimePoints
cce_0922	Cell envelope: Murein sacculus and peptidoglycan	putative rod shape-determining protein; rodA	0.2123	-0.5056	-0.1819	0.6434	0.1475	0.5071	-0.0704	0	0	0	-1	0	0	0	2	OnlyDuringLaterTimePoints
cce_1284	Cell envelope: Murein sacculus and peptidoglycan	UDP-N-acetylglucosamine--N-acetylmuramyl-(pentapeptide) pyrophosphoryl -undecaprenol N-acetylglucosamine transferase; murG	-0.3555	-0.3589	0.1201	0.5287	-0.0587	0.6785	0.3575	0	0	0	0	0	-1	0	2	OnlyDuringLaterTimePoints
cce_2000	Cell envelope: Murein sacculus and peptidoglycan	rod shape-determining protein; mreB	-0.1812	0.0715	0.0159	0.9892	0.1125	0.7241	0.8875	0	0	0	-1	0	-1	-1	2	OnlyDuringLaterTimePoints
cce_2076	Cell envelope: Murein sacculus and peptidoglycan	UDP-N-acetylglucosamine pyrophosphorylase; glmU	0.1339	0.3529	0.1572	-0.3275	0.0885	-0.0319	0.6818	0	0	0	0	0	0	-1	2	OnlyDuringLaterTimePoints
cce_2466	Cell envelope: Murein sacculus and peptidoglycan	glutamate racemase; murI	-0.1211	-0.5081	-0.0569	1.0359	-0.4646	-0.1027	-0.5981	0	0	0	-1	0	0	1	2	OnlyDuringLaterTimePoints
cce_2467	Cell envelope: Murein sacculus and peptidoglycan	N-acetylmuramoyl-L-alanine amidase; amiA2	-0.4204	-0.1557	0.0671	1.346	0.3678	0.5496	0.1364	0	0	0	-1	0	0	0	2	OnlyDuringLaterTimePoints
cce_3458	Cell envelope: Murein sacculus and peptidoglycan	penicillin binding protein, transpeptidase	-0.1025	-0.5897	-0.5008	0.5942	0.4459	0.5466	0.5925	0	0	0	-1	0	0	-1	2	OnlyDuringLaterTimePoints
cce_3719	Cell envelope: Murein sacculus and peptidoglycan	alanine racemase; alr	0.0814	-0.3198	-0.2503	0.0854	-0.3081	0.2314	-0.6737	0	0	0	0	0	0	1	2	OnlyDuringLaterTimePoints
cce_4671	Cell envelope: Murein sacculus and peptidoglycan	unknown	0.2786	0.0595	-0.2364	-0.6995	-2.8743	-0.107	-3.9427	0	0	0	1	1	0	1	2	OnlyDuringLaterTimePoints
cce_4735	Cell envelope: Murein sacculus and peptidoglycan	D-alanine--D-alanine ligase; ddlA	-0.3769	-0.4734	-0.1739	0.1949	-0.2836	0.8221	0.0843	0	0	0	0	0	-1	0	2	OnlyDuringLaterTimePoints
cce_0619	Cell envelope: Surface polysaccharides, lipopolysaccharides and antigens	dTDP-glucose 4,6-dehydratase; rfbB1	-0.0099	0.0037	0.0029	-0.4922	0.6296	-0.0727	0.3508	0	0	0	0	-1	0	0	2	OnlyDuringLaterTimePoints
cce_1406	Cell envelope: Surface polysaccharides, lipopolysaccharides and antigens	DegT/DnrJ/EryC1/StrS aminotransferase family protein	-0.1541	0.0402	0.0418	-0.1703	0.4752	0.2132	0.7092	0	0	0	0	0	0	-1	2	OnlyDuringLaterTimePoints
cce_1828	Cell envelope: Surface polysaccharides, lipopolysaccharides and antigens	acyl-[acyl-carrier-protein]--UDP-N- acetylglucosamine o-acyltransferase; lpxA	-0.1641	-0.1747	-0.1832	0.1529	0.0766	0.5978	0.1898	0	0	0	0	0	-1	0	2	OnlyDuringLaterTimePoints
cce_2207	Cell envelope: Surface polysaccharides, lipopolysaccharides and antigens	UDP-3-O-(3-hydroxymyristoyl) glucosamine N-acyltransferase; lpxD	-0.1803	-0.4791	-0.2927	0.4163	-0.1433	0.7154	0.3623	0	0	0	0	0	-1	0	2	OnlyDuringLaterTimePoints
cce_2486	Cell envelope: Surface polysaccharides, lipopolysaccharides and antigens	putative glycosyl transferase, family 2	-0.0549	-0.2749	-0.3912	-0.1352	-0.185	0.7899	0.2739	0	0	0	0	0	-1	0	2	OnlyDuringLaterTimePoints
cce_2549	Cell envelope: Surface polysaccharides, lipopolysaccharides and antigens	glucose-1-phosphate thymidylyltransferase; rfbA	0.04	0.0199	0.0554	-0.3653	0.4875	0.0731	0.6226	0	0	0	0	0	0	-1	2	OnlyDuringLaterTimePoints
cce_2664	Cell envelope: Surface polysaccharides, lipopolysaccharides and antigens	hypothetical protein; contains a cupin, RmlC-type domain	0.5772	-0.2398	0.082	1.293	0.624	0.4857	1.1073	0	0	0	-1	0	0	-1	2	OnlyDuringLaterTimePoints
cce_3335	Cell envelope: Surface polysaccharides, lipopolysaccharides and antigens	NAD-dependent epimerase/dehydratase	0.0384	-0.0302	-0.0179	-0.3959	0.0263	-0.3833	0.7454	0	0	0	0	0	0	-1	2	OnlyDuringLaterTimePoints
cce_3624	Cell envelope: Surface polysaccharides, lipopolysaccharides and antigens	glycosyl transferase, family 2	0.0927	0.214	0.1062	-0.0637	-0.612	-0.1789	-0.0257	0	0	0	0	1	0	0	2	OnlyDuringLaterTimePoints
cce_1807	Cell envelope: Surface structures	PAP fibrillin	-0.0945	0.1535	-0.2097	-0.8418	-0.1531	-0.1267	0.2897	0	0	0	1	0	0	0	2	OnlyDuringLaterTimePoints
cce_0784	Cellular processes: Cell division	gid protein	0.0677	0.1953	0.0441	1.2862	0.6088	0.6628	-0.0854	0	0	0	-1	-1	-1	0	2	OnlyDuringLaterTimePoints
cce_1270	Cellular processes: Cell division	cell division protein; ftsH1	0.1964	0.2334	-0.2747	0.1966	0.2272	0.4904	-0.6914	0	0	0	0	0	0	1	2	OnlyDuringLaterTimePoints
cce_1314	Cellular processes: Cell division	cell division protein; ftsZ	0.0586	0.174	0.2297	-0.8148	0.4105	-0.2314	0.7714	0	0	0	1	0	0	-1	2	OnlyDuringLaterTimePoints
cce_2475	Cellular processes: Cell division	septum site-determining protein; minD	-0.3874	-0.1764	0.2005	0.0207	0.2361	-0.4283	0.6389	0	0	0	0	0	0	-1	2	OnlyDuringLaterTimePoints
cce_2476	Cellular processes: Cell division	septum site-determining protein; minC	-0.0378	0.1758	0.0537	-0.0118	-0.2289	0.2002	0.6107	0	0	0	0	0	0	-1	2	OnlyDuringLaterTimePoints
cce_3579	Cellular processes: Cell division	cell division protein; ftsH2	0.2534	0.2268	-0.4292	0.4571	-0.0671	0.3593	-0.6197	0	0	0	0	0	0	1	2	OnlyDuringLaterTimePoints
cce_0512	Cellular processes: Cell killing	unknown	-0.322	-0.3614	0.3375	0.1019	0.3687	0.6045	0.4068	0	0	0	0	0	-1	0	2	OnlyDuringLaterTimePoints
cce_1400	Cellular processes: Cell killing	hypothetical protein; contains Peptidase S8 and S53/subtilisin/kexin/sedolisin domains	-0.158	-0.0452	0.2183	0.0176	-0.8833	-0.1683	-0.569	0	0	0	0	1	0	0	2	OnlyDuringLaterTimePoints
cce_2195	Cellular processes: Cell killing	hypothetical protein; contains a hemolysin-type calcium-binding region	0.0763	-0.2276	-0.0253	-0.2797	-0.6307	-0.0547	-0.3239	0	0	0	0	1	0	0	2	OnlyDuringLaterTimePoints
cce_3059	Cellular processes: Cell killing	HlyD-family secretion protein	-0.1554	-0.1258	-0.074	-0.2438	0.2761	-0.605	0.3437	0	0	0	0	0	1	0	2	OnlyDuringLaterTimePoints
cce_5091	Cellular processes: Cell killing	hemolysin-type calcium-binding protein	0.0114	-0.0887	-0.121	0.0204	-0.8871	-0.4162	-0.6628	0	0	0	0	1	0	1	2	OnlyDuringLaterTimePoints
cce_1299	Cellular processes: Chaperones	heat shock protein Hsp40; dnaJ1	-0.1965	0.1779	0.1485	-0.3088	0.7645	0.2903	0.648	0	0	0	0	-1	0	-1	2	OnlyDuringLaterTimePoints
cce_1429	Cellular processes: Chaperones	hypothetical protein; contains a DnaJ N-terminal four helical 'J' domain	-0.0384	0.2013	-0.1617	-0.5326	-0.6973	-0.6232	-0.2289	0	0	0	0	0	1	0	2	OnlyDuringLaterTimePoints
cce_2003	Cellular processes: Chaperones	heat shock protein Hsp70; dnaK1	-0.0216	0.2339	-0.1502	0.4201	0.3269	0.8311	-0.035	0	0	0	0	0	-1	0	2	OnlyDuringLaterTimePoints
cce_4005	Cellular processes: Chaperones	heat shock protein; grpE	-0.0523	-0.0974	-0.3636	-0.3138	0.8451	0.1898	-0.2538	0	0	0	0	-1	0	0	2	OnlyDuringLaterTimePoints
cce_1578	Cellular processes: Chemotaxis	type IV pilus assembly protein; pilM	0.1356	0.4743	-0.0933	0.9285	-1.2075	-0.2766	-0.7988	0	0	0	-1	1	0	1	2	OnlyDuringLaterTimePoints
cce_3163	Cellular processes: Chemotaxis	type 4 prepilin peptidase; hofD	0.1007	0.1021	-0.3565	-0.9617	-1.2398	-0.7607	-1.5855	0	0	0	1	1	1	1	2	OnlyDuringLaterTimePoints
cce_4193	Cellular processes: Chemotaxis	methyl accepting chemotaxis protein	0.0939	-0.0051	-0.0742	0.437	-0.739	-0.1936	-0.1123	0	0	0	0	1	0	0	2	OnlyDuringLaterTimePoints
cce_2698	Cellular processes: Detoxification	cytochrome P450	-0.2	0.1461	0.1027	0.6953	0.3594	0.2068	0.2625	0	0	0	-1	0	0	0	2	OnlyDuringLaterTimePoints
cce_3825	Cellular processes: Detoxification	cytochrome P450	0.1487	0.1559	-0.0857	0.6939	-0.3807	0.9756	-0.2532	0	0	0	-1	0	-1	0	2	OnlyDuringLaterTimePoints
cce_1205	Cellular processes: Protein and peptide secretion	Sec-independent protein translocase protein; tatC	0.1185	0.1206	-0.1291	0.2532	0.2073	0.632	-0.3605	0	0	0	0	0	-1	0	2	OnlyDuringLaterTimePoints
cce_1581	Cellular processes: Protein and peptide secretion	general secretion pathway protein D; gspD	0.0105	-0.6844	-0.3689	1.2657	-0.7336	-0.7213	-0.4466	0	0	0	-1	1	1	0	2	OnlyDuringLaterTimePoints
cce_1790	Cellular processes: Protein and peptide secretion	preprotein translocase subunit SecG; secG	-0.0224	0.0278	-0.1275	-1.1171	-0.1101	0.1439	-0.1592	0	0	0	1	0	0	0	2	OnlyDuringLaterTimePoints
cce_2913	Cellular processes: Protein and peptide secretion	trigger factor; tig	-0.2188	0.2741	0.4711	0.728	0.9335	0.2531	0.7871	0	0	0	-1	-1	0	-1	2	OnlyDuringLaterTimePoints
cce_3475	Cellular processes: Protein and peptide secretion	hypothetical protein; contains a GTP-binding signal recognition particle SRP54 helical bundle domain	-0.0401	-0.018	-0.0986	-0.3721	-0.6628	-0.2728	-0.5712	0	0	0	0	1	0	0	2	OnlyDuringLaterTimePoints
cce_3621	Cellular processes: Protein and peptide secretion	signal peptidase I; lepB2	0.2799	0.2323	-0.0829	0.6536	0.1957	1.136	0.0609	0	0	0	-1	0	-1	0	2	OnlyDuringLaterTimePoints
cce_4033	Cellular processes: Protein and peptide secretion	preprotein translocase SecY subunit; secY	0.0588	-0.1166	0.3918	-0.9836	0.928	0.5608	0.3201	0	0	0	1	-1	0	0	2	OnlyDuringLaterTimePoints
cce_4645	Cellular processes: Protein and peptide secretion	protein export membrane protein; secF	-0.0117	0.1556	0.0277	-0.239	0.829	0.4851	0.7187	0	0	0	0	-1	0	-1	2	OnlyDuringLaterTimePoints
cce_4646	Cellular processes: Protein and peptide secretion	protein export membrane protein; secD	0.1472	0.1779	0.1185	-0.4342	0.7146	0.2205	0.6926	0	0	0	0	0	0	-1	2	OnlyDuringLaterTimePoints
cce_4251	Cellular processes: Transformation	competence-damage protein; cinA	-0.0045	-0.0063	-0.0927	-1.153	0.1058	-0.6633	0.0961	0	0	0	1	0	1	0	2	OnlyDuringLaterTimePoints
cce_1266	Central intermediary metabolism: Amino sugars	glucosamine-fructose-6-phosphate aminotransferase, isomerising; glmS	-0.3463	-0.1052	0.1719	1.0393	0.0934	1.2841	0.8907	0	0	0	-1	0	-1	-1	2	OnlyDuringLaterTimePoints
cce_0202	Central intermediary metabolism: Nitrogen fixation	NifS-like class-V aminotransferase, probable cysteine desulfurase	0.0867	-0.0141	-0.2863	-0.2299	-0.5888	0.1094	-0.8755	0	0	0	0	1	0	1	2	OnlyDuringLaterTimePoints
cce_0547	Central intermediary metabolism: Nitrogen fixation	nifT/fixU	-0.5273	0.0517	-0.1302	-0.6682	2.2225	-0.7204	3.592	0	0	0	1	-1	1	-1	2	OnlyDuringLaterTimePoints
cce_0548	Central intermediary metabolism: Nitrogen fixation	iron-sulfur cofactor synthesis protein; nifZ	-0.3226	0.1687	-0.3362	-0.5069	2.3821	-0.3539	3.1561	0	0	0	0	-1	0	-1	2	OnlyDuringLaterTimePoints
cce_0549	Central intermediary metabolism: Nitrogen fixation	homocitrate synthase; nifV	-0.4613	0.0035	-0.0125	-0.1695	2.8913	-0.1276	3.7918	0	0	0	0	-1	0	-1	2	OnlyDuringLaterTimePoints
cce_0563	Central intermediary metabolism: Nitrogen fixation	nitrogenase molybdenum-iron cofactor biosynthesis protein; nifE	-0.5684	-0.1279	-0.1019	0.3163	2.3112	-0.0083	3.0429	0	0	0	0	-1	0	-1	2	OnlyDuringLaterTimePoints
cce_0564	Central intermediary metabolism: Nitrogen fixation	nitrogenase molybdenum-iron cofactor biosynthesis protein; nifN	-0.4219	-0.137	-0.1123	-0.1301	2.2155	-0.0472	2.7372	0	0	0	0	-1	0	-1	2	OnlyDuringLaterTimePoints
cce_0565	Central intermediary metabolism: Nitrogen fixation	probable nitrogen fixation protein; nifX	-0.2356	-0.2148	-0.0052	-0.27	1.9661	-0.0804	1.8984	0	0	0	0	-1	0	-1	2	OnlyDuringLaterTimePoints
cce_0568	Central intermediary metabolism: Nitrogen fixation	nitrogen fixation protein; nifW	0.4481	0.2524	0.2468	0.4893	2.7297	0.078	2.4955	0	0	0	0	-1	0	-1	2	OnlyDuringLaterTimePoints
cce_3415	Central intermediary metabolism: Nitrogen fixation	cytochrome D ubiquinol oxidase chain I; cydA	-0.0032	0.1402	0.2884	0.879	0.0547	0.7601	0.2238	0	0	0	-1	0	-1	0	2	OnlyDuringLaterTimePoints
cce_0010	Central intermediary metabolism: Nitrogen metabolism	probable fdxN element excision controlling factor protein; xisI1	-0.1518	-0.0661	0.5812	-0.1237	0.7167	0.18	0.3317	0	0	0	0	-1	0	0	2	OnlyDuringLaterTimePoints
cce_0579	Central intermediary metabolism: Nitrogen metabolism	4Fe-4S ferredoxin; fdxB	-0.1336	0.0979	0.0042	-0.9042	1.5649	0.0338	1.8862	0	0	0	1	-1	0	-1	2	OnlyDuringLaterTimePoints
cce_0394	Central intermediary metabolism: Polysaccharides and glycoproteins	glycoside hydrolase family 13, putative neopullulanase; npl	-0.266	-0.2435	0.3472	-0.5357	-0.0213	-0.6764	0.7973	0	0	0	0	0	1	-1	2	OnlyDuringLaterTimePoints
cce_0515	Central intermediary metabolism: Polysaccharides and glycoproteins	probable glycosyl transferase, group 1	-0.088	0.0132	0.4578	0.4634	0.2492	1.2557	0.3031	0	0	0	0	0	-1	0	2	OnlyDuringLaterTimePoints
cce_0606	Central intermediary metabolism: Polysaccharides and glycoproteins	phosphoglucomutase; pgm	0.009	0.1041	-0.4204	-0.7804	0.916	-0.05	0.4831	0	0	0	1	-1	0	0	2	OnlyDuringLaterTimePoints
cce_0798	Central intermediary metabolism: Polysaccharides and glycoproteins	ribulose-phosphate 3-epimerase; rpe	-0.0876	0.0235	-0.3932	-0.9913	0.0067	0.1506	0.1977	0	0	0	1	0	0	0	2	OnlyDuringLaterTimePoints
cce_0987	Central intermediary metabolism: Polysaccharides and glycoproteins	glucose-1-phosphate adenylyltransferase; glgC1	-0.0721	0.1256	-0.4272	-1.9941	0.7237	-0.3495	1.2666	0	0	0	1	-1	0	-1	2	OnlyDuringLaterTimePoints
cce_1629	Central intermediary metabolism: Polysaccharides and glycoproteins	glycogen phosphorylase; glgP1	0.4393	0.2351	0.0286	0.6305	2.0814	0.6634	-0.545	0	0	0	0	-1	-1	0	2	OnlyDuringLaterTimePoints
cce_2391	Central intermediary metabolism: Polysaccharides and glycoproteins	glucosylglycerol-phosphate synthase	0.2056	0.5167	0.1954	0.6003	0.5584	0.3922	0.2108	0	0	0	-1	0	0	0	2	OnlyDuringLaterTimePoints
cce_3396	Central intermediary metabolism: Polysaccharides and glycoproteins	glycogen synthase; glgA1	-0.1402	0.0487	0.1455	-0.8109	0.3908	-0.2833	1.1595	0	0	0	1	0	0	-1	2	OnlyDuringLaterTimePoints
cce_3465	Central intermediary metabolism: Polysaccharides and glycoproteins	glycogen debranching enzyme; glgX	0.3426	0.116	0.5196	0.6975	0.1192	0.0655	-0.0927	0	0	0	-1	0	0	0	2	OnlyDuringLaterTimePoints
cce_4557	Central intermediary metabolism: Polysaccharides and glycoproteins	glycosyl transferase, group 1	-0.4119	0.0344	0.4751	-0.1781	0.3503	0.7321	0.6443	0	0	0	0	0	-1	-1	2	OnlyDuringLaterTimePoints
cce_4615	Central intermediary metabolism: Polysaccharides and glycoproteins	dolichyl-phosphate-mannose synthase	0.1346	0.1548	0.2278	-0.3487	0.4299	0.0239	0.826	0	0	0	0	0	0	-1	2	OnlyDuringLaterTimePoints
cce_0387	DNA replication, restriction, modification, recombination, and repair: DNA replication, restriction, modification, recombination, and repair	putative cytidine/deoxycytidylate deaminase	0.2267	-0.1297	-0.4829	-0.0964	-0.2421	-0.0557	-0.8358	0	0	0	0	0	0	1	2	OnlyDuringLaterTimePoints
cce_1668	DNA replication, restriction, modification, recombination, and repair: DNA replication, restriction, modification, recombination, and repair	putative modulator of DNA gyrase; tldD	0.2011	0.2117	-0.0372	0.4362	0.4478	1.0725	0.0661	0	0	0	0	0	-1	0	2	OnlyDuringLaterTimePoints
cce_1864	DNA replication, restriction, modification, recombination, and repair: DNA replication, restriction, modification, recombination, and repair	DNA polymerase III beta subunit; dnaN1	0.0525	0.098	0.1299	0.1511	0.781	0.264	0.2754	0	0	0	0	-1	0	0	2	OnlyDuringLaterTimePoints
cce_1888	DNA replication, restriction, modification, recombination, and repair: DNA replication, restriction, modification, recombination, and repair	DNA mismatch repair protein; mutS2	-0.148	0.0157	0.417	-0.0734	-0.4223	-0.483	0.683	0	0	0	0	0	0	-1	2	OnlyDuringLaterTimePoints
cce_2335	DNA replication, restriction, modification, recombination, and repair: DNA replication, restriction, modification, recombination, and repair	DNA helicase	-0.0834	-0.1988	0.0425	-0.4705	0.0711	0.0734	-0.8764	0	0	0	0	0	0	1	2	OnlyDuringLaterTimePoints
cce_2448	DNA replication, restriction, modification, recombination, and repair: DNA replication, restriction, modification, recombination, and repair	putative chromosome partitioning protein, ParA family	-0.0924	-0.1588	-0.1684	-1.3093	0.3689	-0.2786	0.557	0	0	0	1	0	0	0	2	OnlyDuringLaterTimePoints
cce_2826	DNA replication, restriction, modification, recombination, and repair: DNA replication, restriction, modification, recombination, and repair	recombination protein; recR	0.0354	0.08	-0.0274	-0.6107	0.5664	0.1364	0.3151	0	0	0	1	0	0	0	2	OnlyDuringLaterTimePoints
cce_3474	DNA replication, restriction, modification, recombination, and repair: DNA replication, restriction, modification, recombination, and repair	putative type II site-specific deoxyribonuclease	-0.3438	-0.4707	0.2919	-0.8728	-0.0006	-0.0386	0.2516	0	0	0	1	0	0	0	2	OnlyDuringLaterTimePoints
cce_3596	DNA replication, restriction, modification, recombination, and repair: DNA replication, restriction, modification, recombination, and repair	mutator protein MutT; mutT	0.1244	0.074	-0.1433	0.2052	-0.6041	0.4322	-0.5464	0	0	0	0	1	0	0	2	OnlyDuringLaterTimePoints
cce_4077	DNA replication, restriction, modification, recombination, and repair: DNA replication, restriction, modification, recombination, and repair	DNA polymerase III alpha subunit, N-terminal extein/intein; dnaE-n	-0.0783	0.0943	0.1705	0.5207	-0.6582	0.3463	-0.5653	0	0	0	0	1	0	0	2	OnlyDuringLaterTimePoints
cce_4442	DNA replication, restriction, modification, recombination, and repair: DNA replication, restriction, modification, recombination, and repair	probable DNA repair helicase	-0.1451	-0.2668	-0.0141	-0.2641	-0.8872	-0.2691	-0.9059	0	0	0	0	1	0	1	2	OnlyDuringLaterTimePoints
cce_4624	DNA replication, restriction, modification, recombination, and repair: DNA replication, restriction, modification, recombination, and repair	NUDIX hydrolase	-0.0662	-0.0382	-0.1011	-0.0041	-0.8019	-0.4388	-0.7633	0	0	0	0	1	0	1	2	OnlyDuringLaterTimePoints
cce_4639	DNA replication, restriction, modification, recombination, and repair: DNA replication, restriction, modification, recombination, and repair	recombination protein; recA	0.2619	0.0385	-0.0744	-0.0772	-0.5946	0.164	-1.4627	0	0	0	0	0	0	1	2	OnlyDuringLaterTimePoints
cce_4723	DNA replication, restriction, modification, recombination, and repair: DNA replication, restriction, modification, recombination, and repair	DNA polymerase III alpha subunit, C-terminal intein/extein; dnaE-c	-0.0115	0.1391	0.1201	0.6176	0.0836	0.2695	0.0495	0	0	0	-1	0	0	0	2	OnlyDuringLaterTimePoints
cce_0835	Energy metabolism: Amino acids and amines	S-adenosyl-L-homocysteine hydrolase; ahcY	-0.0374	0.2233	0.0246	0.631	1.4314	1.2106	1.8403	0	0	0	-1	-1	-1	-1	2	OnlyDuringLaterTimePoints
cce_0902	Energy metabolism: Amino acids and amines	carbamoyl phosphate synthase small subunit; carA	0.145	0.3061	0.4805	0.3202	1.1437	0.3299	0.5293	0	0	0	0	-1	0	0	2	OnlyDuringLaterTimePoints
cce_1595	Energy metabolism: Amino acids and amines	bifunctional proline dehydrogenase/delta-1-pyrroline-5-carboxylate dehydrogenase; putA	0.0402	0.2472	-0.2902	-0.7693	0.5163	-0.2572	-0.4757	0	0	0	1	0	0	0	2	OnlyDuringLaterTimePoints
cce_2038	Energy metabolism: Amino acids and amines	carbamoyl-phosphate synthase, large subunit; carB	0.1073	0.0234	0.4034	0.7743	0.5599	0.246	0.8496	0	0	0	-1	0	0	-1	2	OnlyDuringLaterTimePoints
cce_3553	Energy metabolism: Amino acids and amines	asparaginase	-0.2848	0.0134	0.3445	-0.2542	0.5169	-0.3422	0.8393	0	0	0	0	0	0	-1	2	OnlyDuringLaterTimePoints
cce_1456	Energy metabolism: Biosynthesis and degradation of polysaccharides	putative alpha-glucosidase	0.052	-0.133	0.2065	0.0486	-0.4982	-0.1512	-0.638	0	0	0	0	0	0	1	2	OnlyDuringLaterTimePoints
cce_2139	Energy metabolism: Biosynthesis and degradation of polysaccharides	probable alpha-glucosidase; malZ	0.271	-0.0664	-0.1554	-0.8978	0.8355	-0.0164	0.2913	0	0	0	1	-1	0	0	2	OnlyDuringLaterTimePoints
cce_2766	Energy metabolism: Glycolate pathway	hypothetical protein	0.0777	0.0797	0.1993	-0.1293	-1.5926	-0.1032	-2.3334	0	0	0	0	1	0	1	2	OnlyDuringLaterTimePoints
cce_0595	Energy metabolism: Glycolysis	glucokinase; glk	-0.0589	0.01	0.0781	-0.2002	0.6316	-0.0554	0.453	0	0	0	0	-1	0	0	2	OnlyDuringLaterTimePoints
cce_0669	Energy metabolism: Glycolysis	6-phosphofructokinase; pfkA1	-0.0617	0.0051	0.2997	-0.614	0.6779	-0.09	0.115	0	0	0	1	-1	0	0	2	OnlyDuringLaterTimePoints
cce_0701	Energy metabolism: Glycolysis	pyruvate kinase; pykF4	-0.1881	-0.4472	-0.3828	-0.2367	-0.896	-0.4681	-1.9792	0	0	0	0	1	0	1	2	OnlyDuringLaterTimePoints
cce_1310	Energy metabolism: Glycolysis	glycerol dehydrogenase; gldA	0.1969	0.1162	0.1055	0.8586	-0.1898	0.1631	-0.3162	0	0	0	-1	0	0	0	2	OnlyDuringLaterTimePoints
cce_1357	Energy metabolism: Glycolysis	fructose-1,6-bisphosphate aldolase	0.1226	0.5015	-0.3751	-0.3507	-0.204	1.3821	-0.4174	0	0	0	0	0	-1	0	2	OnlyDuringLaterTimePoints
cce_1542	Energy metabolism: Glycolysis	phosphoglycerate mutase; gpmA	-0.3185	-0.2388	-0.1376	0.6783	0.0048	0.48	0.1988	0	0	0	-1	0	0	0	2	OnlyDuringLaterTimePoints
cce_1789	Energy metabolism: Glycolysis	2,3-bisphosphoglycerate-independent phosphoglycerate mutase; gpmI	0.0995	-0.0763	-0.2217	-1.1616	0.2649	-0.1255	-0.434	0	0	0	1	0	0	0	2	OnlyDuringLaterTimePoints
cce_2876	Energy metabolism: Glycolysis	unknown; contains an alpha amylase, catalytic region	0.0364	0.0272	0.1826	0.0701	0.6155	0.0802	0.621	0	0	0	0	0	0	-1	2	OnlyDuringLaterTimePoints
cce_3420	Energy metabolism: Glycolysis	pyruvate kinase; pykF1	-0.0028	-0.0393	-0.0819	0.0528	1.0918	-0.4544	0.6179	0	0	0	0	-1	0	-1	2	OnlyDuringLaterTimePoints
cce_4758	Energy metabolism: Glycolysis	fructose 1,6-bisphosphatase I	0.2861	0.3023	0.3529	0.9096	1.0226	0.33	0.5149	0	0	0	-1	-1	0	0	2	OnlyDuringLaterTimePoints
cce_1331	Energy metabolism: Pentose phosphate pathway	glucosamine-6-P isomerase; nagB	-0.2412	0.1019	0.2316	-0.2787	-0.6648	0.0835	-0.059	0	0	0	0	1	0	0	2	OnlyDuringLaterTimePoints
cce_2535	Energy metabolism: Pentose phosphate pathway	OxPPCycle protein; opcA	0.1846	0.1087	0.4558	0.9974	0.8962	-0.0166	0.1303	0	0	0	-1	-1	0	0	2	OnlyDuringLaterTimePoints
cce_2536	Energy metabolism: Pentose phosphate pathway	glucose-6-phosphate dehydrogenase; zwf	0.1244	0.0551	0.1644	1.3927	1.6476	0.3829	0.8959	0	0	0	-1	-1	0	-1	2	OnlyDuringLaterTimePoints
cce_4627	Energy metabolism: Pentose phosphate pathway	transketolase; tktA	0.0501	0.1204	-0.4887	-1.3939	1.2423	0.2227	0.9937	0	0	0	1	-1	0	-1	2	OnlyDuringLaterTimePoints
cce_4687	Energy metabolism: Pentose phosphate pathway	transaldolase AB family; talA/talB	0.5421	0.3927	0.3148	0.6503	1.2627	-0.0704	0.7075	0	0	0	-1	-1	0	-1	2	OnlyDuringLaterTimePoints
cce_0800	Energy metabolism: Pyruvate and acetyl-CoA metabolism	acetate kinase; ackA1	0.1017	-0.0386	-0.4075	0.1217	0.0358	-0.0352	-1.2709	0	0	0	0	0	0	1	2	OnlyDuringLaterTimePoints
cce_1190	Energy metabolism: Pyruvate and acetyl-CoA metabolism	glyoxalase II	0.1633	0.1818	0.1395	0.246	-0.628	0.308	-0.6953	0	0	0	0	1	0	1	2	OnlyDuringLaterTimePoints
cce_1632	Energy metabolism: Pyruvate and acetyl-CoA metabolism	PEP/pyruvate-binding protein	0.1273	-0.0437	-0.1569	0.0909	-0.3616	-0.1335	-0.6143	0	0	0	0	0	0	1	2	OnlyDuringLaterTimePoints
cce_2775	Energy metabolism: Pyruvate and acetyl-CoA metabolism	phosphoenolpyruvate synthase	0.0165	0.1543	-0.0116	0.2041	-2.1204	-0.4735	0.0952	0	0	0	0	1	0	0	2	OnlyDuringLaterTimePoints
cce_3229	Energy metabolism: Pyruvate and acetyl-CoA metabolism	aldehyde dehydrogenase	0.2284	0.472	-0.3398	-0.7246	-1.436	-0.5386	-3.0378	0	0	0	1	1	0	1	2	OnlyDuringLaterTimePoints
cce_3246	Energy metabolism: Pyruvate and acetyl-CoA metabolism	malic oxidoreductase	0.1619	0.1273	-0.2115	1.0209	1.5269	0.4784	0.9374	0	0	0	-1	-1	0	-1	2	OnlyDuringLaterTimePoints
cce_3822	Energy metabolism: Pyruvate and acetyl-CoA metabolism	phosphoenolpyruvate carboxylase; ppc	0.1348	0.0992	0.3018	1.235	0.2919	0.273	-0.1557	0	0	0	-1	0	0	0	2	OnlyDuringLaterTimePoints
cce_4692	Energy metabolism: Pyruvate and acetyl-CoA metabolism	phosphoenolpyruvate synthase; ppsA	-0.1956	0.2363	0.3975	1.0975	0.4308	0.0394	0.0587	0	0	0	-1	0	0	0	2	OnlyDuringLaterTimePoints
cce_0292	Energy metabolism: Pyruvate dehydrogenase	pyruvate dehydrogenase E1 component alpha subunit; pdhA	0.1402	0.0432	-0.1481	-0.9086	1.1962	-0.042	1.0482	0	0	0	1	-1	0	-1	2	OnlyDuringLaterTimePoints
cce_0735	Energy metabolism: Pyruvate dehydrogenase	dihydrolipoamide dehydrogenase; lpdA	0.1446	-0.0377	-0.0488	-0.7108	1.1043	0.155	0.5223	0	0	0	1	-1	0	0	2	OnlyDuringLaterTimePoints
cce_4647	Energy metabolism: Pyruvate dehydrogenase	pyruvate dehydrogenase E1 component beta subunit; pdhB	-0.104	0.1873	0.2182	-0.9772	1.0597	0.265	1.3587	0	0	0	1	-1	0	-1	2	OnlyDuringLaterTimePoints
cce_0103	Energy metabolism: Sugars	ribose 5-phosphate isomerase; rpiA	0.14	0.1473	0.0218	0.0314	1.136	0.5414	1.3117	0	0	0	0	-1	0	-1	2	OnlyDuringLaterTimePoints
cce_0222	Energy metabolism: Sugars	putative glucose 1-dehydrogenase	0.0242	0.0399	-0.0414	0.0913	-0.7496	-0.0984	-0.7359	0	0	0	0	1	0	1	2	OnlyDuringLaterTimePoints
cce_0336	Energy metabolism: Sugars	mannose-1-phosphate guanyltransferase	0.057	0.0123	-0.0656	-0.6568	0.7172	0.19	0.9679	0	0	0	0	-1	0	-1	2	OnlyDuringLaterTimePoints
cce_0476	Energy metabolism: Sugars	2-C-methyl-D-erythritol 24-cyclodiphosphate synthase; ispF	0.1952	0.1573	-0.0738	-0.6025	0.1322	-0.0245	0.1237	0	0	0	1	0	0	0	2	OnlyDuringLaterTimePoints
cce_0666	Energy metabolism: Sugars	glucose-6-phosphate isomerase; pgi1	0.0625	0.0799	0.5032	1.3324	2.0486	0.5904	1.3556	0	0	0	-1	-1	-1	-1	2	OnlyDuringLaterTimePoints
cce_0782	Energy metabolism: Sugars	aldo/keto reductase	0.033	0.1807	0.047	0.7794	0.1543	-0.0207	-0.2321	0	0	0	-1	0	0	0	2	OnlyDuringLaterTimePoints
cce_1474	Energy metabolism: Sugars	4-alpha-glucanotransferase; malQ	0.1521	0.0865	-0.1611	-1.0598	0.9031	-0.038	1.2607	0	0	0	1	-1	0	-1	2	OnlyDuringLaterTimePoints
cce_2253	Energy metabolism: Sugars	mannose-1-phosphate guanylyltransferase; manC	-0.2488	-0.2605	0.2521	0.5885	0.7465	0.6963	1.3816	0	0	0	-1	-1	-1	-1	2	OnlyDuringLaterTimePoints
cce_2771	Energy metabolism: Sugars	mannose-6-phosphate isomerase; manA1	-0.0621	0.3936	0.4396	1.1001	-0.9153	0.4259	0.2932	0	0	0	-1	1	0	0	2	OnlyDuringLaterTimePoints
cce_3233	Energy metabolism: Sugars	GDP-D-mannose 4,6-dehydratase; gmd	0.0779	0.5334	-0.071	0.3577	0.354	0.3378	0.7389	0	0	0	0	0	0	-1	2	OnlyDuringLaterTimePoints
cce_0396	Energy metabolism: TCA cycle	fumarate hydratase; fumC	0.0196	0.1159	0.0957	0.8853	0.0994	0.0414	0.3813	0	0	0	-1	0	0	0	2	OnlyDuringLaterTimePoints
cce_0663	Energy metabolism: TCA cycle	succinate dehydrogenase flavoprotein subunit; sdhA	0.2301	0.1041	-0.1374	0.0833	1.6918	0.6625	0.9509	0	0	0	0	-1	-1	-1	2	OnlyDuringLaterTimePoints
cce_1850	Energy metabolism: TCA cycle	malate dehydrogenase; mdh	0.1245	0.0622	-0.1981	-0.3534	-0.0653	0.6411	-0.7399	0	0	0	0	0	-1	1	2	OnlyDuringLaterTimePoints
cce_1900	Energy metabolism: TCA cycle	citrate synthase; gltA	0.3223	0.0864	-0.314	-0.2908	1.1192	0.0546	0.0396	0	0	0	0	-1	0	0	2	OnlyDuringLaterTimePoints
cce_3202	Energy metabolism: TCA cycle	isocitrate dehydrogenase (NADP+); icd	0.076	0.1804	0.2386	0.4506	0.807	0.1882	0.9114	0	0	0	0	-1	0	-1	2	OnlyDuringLaterTimePoints
cce_4228	Energy metabolism: TCA cycle	succinate-semialdehyde dehydrogenase (NADP+); gabD	0.0952	0.2607	0.0352	-0.1901	-0.8318	-0.6426	-0.9728	0	0	0	0	1	1	1	2	OnlyDuringLaterTimePoints
cce_0460	Fatty acid, phospholipid, and sterol metabolism: Fatty acid, phospholipid, and sterol metabolism	enoyl-[acyl-carrier-protein] reductase; fabI	0.1954	0.2251	-0.1626	-1.2846	0.8043	0.2816	1.0102	0	0	0	1	-1	0	-1	2	OnlyDuringLaterTimePoints
cce_0767	Fatty acid, phospholipid, and sterol metabolism: Fatty acid, phospholipid, and sterol metabolism	lipoate synthetase; lipA1	0.0477	-0.0451	-0.0678	-0.7232	0.2402	0.1994	0.1989	0	0	0	1	0	0	0	2	OnlyDuringLaterTimePoints
cce_0973	Fatty acid, phospholipid, and sterol metabolism: Fatty acid, phospholipid, and sterol metabolism	glycerol kinase; glpK	0.0836	0.4908	0.0198	-0.6784	-0.2489	0.0729	0.4528	0	0	0	1	0	0	0	2	OnlyDuringLaterTimePoints
cce_1583	Fatty acid, phospholipid, and sterol metabolism: Fatty acid, phospholipid, and sterol metabolism	malonyl coenzyme A-acyl carrier protein transacylase; fabD	-0.0645	0.1629	0.5473	-0.6447	0.5335	0.3372	0.7903	0	0	0	1	0	0	-1	2	OnlyDuringLaterTimePoints
cce_1584	Fatty acid, phospholipid, and sterol metabolism: Fatty acid, phospholipid, and sterol metabolism	3-oxoacyl-[acyl-carrier-protein] synthase III; fabH	0.1099	0.2564	0.3475	-0.7856	0.7126	0.4723	1.0352	0	0	0	1	-1	0	-1	2	OnlyDuringLaterTimePoints
cce_1585	Fatty acid, phospholipid, and sterol metabolism: Fatty acid, phospholipid, and sterol metabolism	fatty acid/phospholipid synthesis protein; plsX	0.0275	0.4128	0.4144	-0.4989	0.9625	0.7507	1.5905	0	0	0	0	-1	-1	-1	2	OnlyDuringLaterTimePoints
cce_1654	Fatty acid, phospholipid, and sterol metabolism: Fatty acid, phospholipid, and sterol metabolism	AMP-dependent synthetase and ligase/probable acyl-CoA synthase	-0.0367	-0.0958	0.0078	1.4391	0.2714	0.5468	0.2001	0	0	0	-1	0	0	0	2	OnlyDuringLaterTimePoints
cce_1829	Fatty acid, phospholipid, and sterol metabolism: Fatty acid, phospholipid, and sterol metabolism	lipid A disaccharide synthase; lpxB2	-0.3234	-0.1236	0.0152	0.2261	0.3297	1.1084	0.798	0	0	0	0	0	-1	-1	2	OnlyDuringLaterTimePoints
cce_1830	Fatty acid, phospholipid, and sterol metabolism: Fatty acid, phospholipid, and sterol metabolism	lipid A disaccharide synthase; lpxB1	-0.451	-0.1995	0.1723	0.0386	0.2392	0.7891	0.7307	0	0	0	0	0	-1	-1	2	OnlyDuringLaterTimePoints
cce_1897	Fatty acid, phospholipid, and sterol metabolism: Fatty acid, phospholipid, and sterol metabolism	N-acyl-L-amino acid amidohydrolase; ama2	-0.1368	-0.0272	-0.3341	-1.1115	0.6832	-0.2745	0.221	0	0	0	1	-1	0	0	2	OnlyDuringLaterTimePoints
cce_2082	Fatty acid, phospholipid, and sterol metabolism: Fatty acid, phospholipid, and sterol metabolism	acetyl-CoA carboxylase beta subunit; accD	0.1125	-0.0548	-0.2356	-0.9757	-0.0922	-0.2593	-0.384	0	0	0	1	0	0	0	2	OnlyDuringLaterTimePoints
cce_2121	Fatty acid, phospholipid, and sterol metabolism: Fatty acid, phospholipid, and sterol metabolism	acetyl-CoA carboxylase, biotin carboxyl carrier protein; accB	0.1088	0.2178	-0.0157	-0.5177	1.0534	0.1476	0.6391	0	0	0	0	-1	0	-1	2	OnlyDuringLaterTimePoints
cce_2412	Fatty acid, phospholipid, and sterol metabolism: Fatty acid, phospholipid, and sterol metabolism	3-oxoacyl-[acyl-carrier protein] reductase; fabG	0.0477	-0.1482	-0.5477	-2.0247	0.8619	-0.0748	0.6056	0	0	0	1	-1	0	-1	2	OnlyDuringLaterTimePoints
cce_2610	Fatty acid, phospholipid, and sterol metabolism: Fatty acid, phospholipid, and sterol metabolism	probable glycerol-3-phosphate dehydrogenase; glpD	0.2902	0.5458	0.0128	0.4572	-0.2449	0.5894	0.6003	0	0	0	0	0	-1	-1	2	OnlyDuringLaterTimePoints
cce_2618	Fatty acid, phospholipid, and sterol metabolism: Fatty acid, phospholipid, and sterol metabolism	probable fatty acid desaturase	0.1051	0.1723	-0.1868	-0.7593	-0.8213	-0.1023	-0.9088	0	0	0	1	1	0	1	2	OnlyDuringLaterTimePoints
cce_2713	Fatty acid, phospholipid, and sterol metabolism: Fatty acid, phospholipid, and sterol metabolism	fatty acid desaturase; desC2	-0.0473	0.0687	0.0891	0.203	-0.6707	0.121	-1.176	0	0	0	0	1	0	1	2	OnlyDuringLaterTimePoints
cce_2888	Fatty acid, phospholipid, and sterol metabolism: Fatty acid, phospholipid, and sterol metabolism	diacylglycerol kinase; dgkA	0.2172	0.5206	-0.0234	1.3706	0.1412	0.4859	0.396	0	0	0	-1	0	0	0	2	OnlyDuringLaterTimePoints
cce_3100	Fatty acid, phospholipid, and sterol metabolism: Fatty acid, phospholipid, and sterol metabolism	fatty acid desaturase; desC1	0.3634	0.343	0.1266	0.3302	1.1089	1.213	0.6687	0	0	0	0	-1	-1	-1	2	OnlyDuringLaterTimePoints
cce_3275	Fatty acid, phospholipid, and sterol metabolism: Fatty acid, phospholipid, and sterol metabolism	acetyl-CoA carboxylase, biotin carboxylase subunit; accC	0.0539	-0.0951	-0.0776	-1.131	1.1543	-0.1128	0.6479	0	0	0	1	-1	0	-1	2	OnlyDuringLaterTimePoints
cce_3588	Fatty acid, phospholipid, and sterol metabolism: Fatty acid, phospholipid, and sterol metabolism	glucose/ribitol short chain dehydrogenase/reductase family protein	0.5588	0.4506	0.3691	1.5169	1.1525	2.0093	0.8897	0	0	0	-1	-1	-1	-1	2	OnlyDuringLaterTimePoints
cce_3759	Fatty acid, phospholipid, and sterol metabolism: Fatty acid, phospholipid, and sterol metabolism	probable fatty acid desaturase	0.2063	-0.0754	0.0022	-0.3357	-0.5937	-0.2162	-0.1722	0	0	0	0	1	0	0	2	OnlyDuringLaterTimePoints
cce_3764	Fatty acid, phospholipid, and sterol metabolism: Fatty acid, phospholipid, and sterol metabolism	unknown; contains PINc-like Nucleotide binding protein and PhoH domains	0.3595	0.019	-0.4361	-0.0947	-0.682	0.0013	-1.6436	0	0	0	0	1	0	1	2	OnlyDuringLaterTimePoints
cce_3933	Fatty acid, phospholipid, and sterol metabolism: Fatty acid, phospholipid, and sterol metabolism	acetyl-CoA carboxylase alpha subunit; accA	0.0034	-0.1647	-0.3372	-1.0979	0.4819	-0.1783	0.2474	0	0	0	1	0	0	0	2	OnlyDuringLaterTimePoints
cce_3989	Fatty acid, phospholipid, and sterol metabolism: Fatty acid, phospholipid, and sterol metabolism	probable fatty acid desaturase	0.0443	0.1954	0.3289	0.2028	-1.0317	-0.0208	0.0114	0	0	0	0	1	0	0	2	OnlyDuringLaterTimePoints
cce_4117	Fatty acid, phospholipid, and sterol metabolism: Fatty acid, phospholipid, and sterol metabolism	acyl carrier protein; acp	0.1894	0.2143	0.0067	-1.8457	1.1679	0.0938	1.772	0	0	0	1	-1	0	-1	2	OnlyDuringLaterTimePoints
cce_4118	Fatty acid, phospholipid, and sterol metabolism: Fatty acid, phospholipid, and sterol metabolism	3-oxoacyl-[acyl-carrier-protein] synthase I/II; fabF	0.2726	0.2653	-0.0005	-1.9133	0.9891	-0.0219	1.5681	0	0	0	1	-1	0	-1	2	OnlyDuringLaterTimePoints
cce_4352	Fatty acid, phospholipid, and sterol metabolism: Fatty acid, phospholipid, and sterol metabolism	probable lipoprotein signal peptidase; lspA	0.1288	0.1835	-0.0312	-0.2342	0.0164	0.2194	0.6682	0	0	0	0	0	0	-1	2	OnlyDuringLaterTimePoints
cce_4915	Fatty acid, phospholipid, and sterol metabolism: Fatty acid, phospholipid, and sterol metabolism	unknown; contains PINc-like Nucleotide binding protein and PhoH domains	0.2481	-0.1909	-0.4551	-0.2667	-0.6812	-0.2364	-2.2029	0	0	0	0	1	0	1	2	OnlyDuringLaterTimePoints
cce_0155	Other categories: Adaptations and atypical conditions	light repressed protein; lrtA	0.0592	0.3189	0.2047	-0.4237	0.1922	-1.0959	-0.7828	0	0	0	0	0	1	1	2	OnlyDuringLaterTimePoints
cce_0479	Other categories: Adaptations and atypical conditions	probable nutrient-stress induced DNA binding protein	-0.1218	0.0221	0.2103	-0.4894	1.1816	0.4392	0.8104	0	0	0	0	-1	0	-1	2	OnlyDuringLaterTimePoints
cce_1983	Other categories: Adaptations and atypical conditions	probable phytochrome A, two-component sensor protein; aphA	0.2028	-0.0095	0.2893	-0.0687	-0.8784	-0.0389	-1.2856	0	0	0	0	1	0	1	2	OnlyDuringLaterTimePoints
cce_2237	Other categories: Adaptations and atypical conditions	cyanophycin synthetase; cphA	-0.1104	-0.0759	-0.1515	-0.3008	0.9653	0.1811	0.2518	0	0	0	0	-1	0	0	2	OnlyDuringLaterTimePoints
cce_3583	Other categories: Adaptations and atypical conditions	putative CAB/ELIP/HLIP family protein	-0.1655	-0.0814	0.3324	0.8925	0.706	0.9283	0.8698	0	0	0	-1	-1	-1	-1	2	OnlyDuringLaterTimePoints
cce_5296	Other categories: Adaptations and atypical conditions	putative virulence associated protein C; vapC1	0.1501	-0.0485	-0.4092	-1.0852	-0.1045	-0.5706	-0.6383	0	0	0	1	0	0	1	2	OnlyDuringLaterTimePoints
cce_0113	Other categories: Drug and analog sensitivity	putative transport protein	0.2525	0.03	-0.4142	-0.9137	0.1431	-0.4922	-0.1883	0	0	0	1	0	0	0	2	OnlyDuringLaterTimePoints
cce_0135	Other categories: Drug and analog sensitivity	putative rehydrin	-0.0758	-0.0046	-0.1786	-1.5444	1.2381	-0.2214	1.4386	0	0	0	1	-1	0	-1	2	OnlyDuringLaterTimePoints
cce_0888	Other categories: Drug and analog sensitivity	two-component sensor histidine kinase; nblS	0.0531	-0.0556	-0.2515	-0.3894	-0.3147	0.1279	-0.5893	0	0	0	0	0	0	1	2	OnlyDuringLaterTimePoints
cce_1333	Other categories: Drug and analog sensitivity	putative general substrate transporter, MFS family	0.06	0.1674	-0.1367	0.4478	-0.6003	0.4309	-0.4994	0	0	0	0	1	0	0	2	OnlyDuringLaterTimePoints
cce_1358	Other categories: Drug and analog sensitivity	probable glycosyl transferase, family 4	0.3971	0.0435	-0.205	-0.6587	-0.6875	-0.1005	-0.959	0	0	0	1	1	0	1	2	OnlyDuringLaterTimePoints
cce_1643	Other categories: Drug and analog sensitivity	probable nitroreductase	0.0481	0.1994	0.3262	0.3165	0.4147	0.8246	0.3965	0	0	0	0	0	-1	0	2	OnlyDuringLaterTimePoints
cce_2453	Other categories: Drug and analog sensitivity	penicillin-binding protein 1A	0.1021	0.0678	0.0306	0.6493	0.0161	0.3979	0.6997	0	0	0	-1	0	0	-1	2	OnlyDuringLaterTimePoints
cce_2768	Other categories: Drug and analog sensitivity	probable nitroreductase	0.1139	0.2029	0.3228	0.269	1.0662	0.76	0.4882	0	0	0	0	-1	-1	0	2	OnlyDuringLaterTimePoints
cce_3099	Other categories: Drug and analog sensitivity	aluminium resistance protein	0.0493	0.0385	0.2499	-0.0678	0.6979	0.4577	0.3562	0	0	0	0	-1	0	0	2	OnlyDuringLaterTimePoints
cce_3444	Other categories: Drug and analog sensitivity	penicillin-binding protein	-0.3842	-0.3114	-0.2539	0.7513	0.2463	1.0072	0.1474	0	0	0	-1	0	-1	0	2	OnlyDuringLaterTimePoints
cce_4147	Other categories: Drug and analog sensitivity	penicillin-binding protein 1B	-0.1115	-0.4893	-0.4556	0.7077	0.2212	0.7448	0.1811	0	0	0	-1	0	-1	0	2	OnlyDuringLaterTimePoints
cce_0569	Other categories: heterocyst differentiation	putative molybdenum cofactor biosynthesis/nitrogen fixation related protein; hesA	0.3086	0.0613	0.2484	0.1233	2.3779	-0.1731	2.0499	0	0	0	0	-1	0	-1	2	OnlyDuringLaterTimePoints
cce_0570	Other categories: heterocyst differentiation	Fe-S cluster biosynthesis, putative nitrogen fixation related protein; hesB/yadR/yfhF	0.2529	0.0565	0.1011	0.247	2.467	0.0006	2.4563	0	0	0	0	-1	0	-1	2	OnlyDuringLaterTimePoints
cce_0571	Other categories: heterocyst differentiation	2Fe-2S ferredoxin, putative nitrogen fixation related protein	-0.08	-0.083	0.4233	0.001	2.1914	0.1564	2.7639	0	0	0	0	-1	0	-1	2	OnlyDuringLaterTimePoints
cce_0648	Other categories: heterocyst differentiation	ABC transporter permease protein, probable glycolipid exporter; devC	0.093	0.0195	-0.1631	-0.5174	0.4867	0.3436	0.6142	0	0	0	0	0	0	-1	2	OnlyDuringLaterTimePoints
cce_1063	Other categories: Hydrogenase	[NiFe] uptake hydrogenase small subunit; hupS	-0.2241	0.0452	0.1816	-0.4138	0.3172	-0.6887	-3.2186	0	0	0	0	0	1	1	2	OnlyDuringLaterTimePoints
cce_1064	Other categories: Hydrogenase	[NiFe] uptake hydrogenase large subunit; hupL	-0.0791	0.0664	0.3401	-0.0438	0.98	-0.2199	-1.2538	0	0	0	0	-1	0	0	2	OnlyDuringLaterTimePoints
cce_2317	Other categories: Hydrogenase	hydrogenase chain U; hoxU	0.1253	0.0443	-0.0297	-0.1106	0.6017	0.2228	-0.2252	0	0	0	0	-1	0	0	2	OnlyDuringLaterTimePoints
cce_2319	Other categories: Hydrogenase	probable NADH dehydrogenase I chain E; hoxE	0.0834	0.2167	-0.1856	-0.3145	0.6749	0.2743	-0.2313	0	0	0	0	-1	0	0	2	OnlyDuringLaterTimePoints
cce_2879	Other categories: Hydrogenase	soluble hydrogenase 42 kD subunit, small subunit of soluble hydrogenase	0.014	0.3716	0.4075	0.2769	1.19	-0.1737	0.4917	0	0	0	0	-1	0	0	2	OnlyDuringLaterTimePoints
cce_2902	Other categories: Hydrogenase	hydrogenase expression/synthesis; hypA	0.052	0.0888	0.5575	0.5997	0.0285	-0.2926	-0.321	0	0	0	-1	0	0	0	2	OnlyDuringLaterTimePoints
cce_3961	Other categories: Hydrogenase	putative hydrogenase expression/formation protein; hypC	-0.5281	-0.2995	-0.5192	-0.0291	-0.2814	-0.9859	-0.3978	0	0	0	0	0	1	0	2	OnlyDuringLaterTimePoints
cce_0145	Other categories: Other	putative circadian clock protein; kaiB4	0.2941	0.328	-0.0476	-0.2916	0.2905	-0.0975	-1.0829	0	0	0	0	0	0	1	2	OnlyDuringLaterTimePoints
cce_0149	Other categories: Other	probable protein phosphatase	0.1103	-0.0423	-0.393	-0.4046	0.2795	-0.0683	-0.6062	0	0	0	0	0	0	1	2	OnlyDuringLaterTimePoints
cce_0168	Other categories: Other	unknown	-0.5092	-0.4056	-0.1131	1.5914	-1.3934	1.0659	-0.7646	0	0	0	-1	1	-1	1	2	OnlyDuringLaterTimePoints
cce_0206	Other categories: Other	alcohol dehydrogenase	0.1669	0.1124	-0.1767	-0.5449	0.899	0.058	0.5838	0	0	0	0	-1	0	0	2	OnlyDuringLaterTimePoints
cce_0271	Other categories: Other	probable alpha amylase	0.0815	0.0547	-0.0549	-0.2842	-0.5903	-0.0814	-2.238	0	0	0	0	1	0	1	2	OnlyDuringLaterTimePoints
cce_0338	Other categories: Other	probable acylneuraminate cytidylyltransferase	-0.0791	0.0142	-0.2055	-0.6059	0.1687	0.0466	0.2845	0	0	0	1	0	0	0	2	OnlyDuringLaterTimePoints
cce_0378	Other categories: Other	glycosyl transferase, family 2	-0.2573	-0.2789	0.2543	-0.0811	0.1075	0.6032	0.5267	0	0	0	0	0	-1	0	2	OnlyDuringLaterTimePoints
cce_0422	Other categories: Other	circadian clock protein; kaiC1	-0.066	0.007	0.2322	-0.6808	-0.7072	-0.5104	-0.5632	0	0	0	1	1	0	0	2	OnlyDuringLaterTimePoints
cce_0435	Other categories: Other	circadian clock protein; kaiB3	0.0518	-0.0115	-0.4887	-0.3282	-0.719	-0.3876	-1.1377	0	0	0	0	1	0	1	2	OnlyDuringLaterTimePoints
cce_0491	Other categories: Other	glutaredoxin; grxC1	0.0221	-0.0362	-0.1513	-0.7855	0.5142	0.184	-0.2228	0	0	0	1	0	0	0	2	OnlyDuringLaterTimePoints
cce_0493	Other categories: Other	6-pyruvoyl tetrahydropterin synthase; ptpS	0.0489	-0.1213	-0.2463	0.6568	1.1102	0.7782	0.1397	0	0	0	-1	-1	-1	0	2	OnlyDuringLaterTimePoints
cce_0711	Other categories: Other	glycosyl transferase, group 1	0.0854	0.0434	-0.3201	0.4248	0.1833	-1.0756	0.7686	0	0	0	0	0	1	-1	2	OnlyDuringLaterTimePoints
cce_0745	Other categories: Other	esterase	-0.1517	-0.2159	-0.008	-0.7576	0.1852	0.386	-0.1153	0	0	0	1	0	0	0	2	OnlyDuringLaterTimePoints
cce_1019	Other categories: Other	glycosyl transferase, group 1	-0.1399	-0.2156	-0.1748	-1.2926	0.5474	0.0203	0.4348	0	0	0	1	0	0	0	2	OnlyDuringLaterTimePoints
cce_1136	Other categories: Other	GTP-dependent translation factor; ychF	-0.0082	-0.0821	0.1889	-0.2163	1.0596	-0.0771	0.5139	0	0	0	0	-1	0	0	2	OnlyDuringLaterTimePoints
cce_1202	Other categories: Other	isopentenyl-diphosphate delta-isomerase, type 2	0.1051	0.079	-0.1212	0.5868	-0.0254	0.3334	0.0486	0	0	0	-1	0	0	0	2	OnlyDuringLaterTimePoints
cce_1234	Other categories: Other	NAD-dependent epimerase/dehydratase	0.0724	0.1304	0.1174	0.6463	0.2314	0.9543	0.897	0	0	0	-1	0	-1	-1	2	OnlyDuringLaterTimePoints
cce_1253	Other categories: Other	sulfatase	0.1542	0.0136	-0.0831	-0.8211	0.1585	-0.4288	0.1498	0	0	0	1	0	0	0	2	OnlyDuringLaterTimePoints
cce_1337	Other categories: Other	photomixotrophic growth related protein; pmgA	0.0418	-0.2765	-0.184	-0.3644	-1.3474	0.0488	-1.212	0	0	0	0	1	0	1	2	OnlyDuringLaterTimePoints
cce_1349	Other categories: Other	undecaprenyl pyrophosphate synthetase; uppS2	0.0437	0.009	-0.0726	-0.6525	0.7067	0.2243	0.3608	0	0	0	1	-1	0	0	2	OnlyDuringLaterTimePoints
cce_1401	Other categories: Other	1-deoxy-D-xylulose-5-phosphate synthase; dxs	0.2202	0.0863	-0.1781	-0.5974	1.0436	0.4774	0.3305	0	0	0	1	-1	0	0	2	OnlyDuringLaterTimePoints
cce_1468	Other categories: Other	putative lipopolysaccharide biosynthesis	-0.1285	0.0381	-0.1031	0.8101	0.0883	-0.038	-0.5915	0	0	0	-1	0	0	1	2	OnlyDuringLaterTimePoints
cce_1611	Other categories: Other	putative carbohydrate kinase, PfkB family	-0.2097	0.3903	0.1964	-0.2661	1.091	0.4723	1.1337	0	0	0	0	-1	0	-1	2	OnlyDuringLaterTimePoints
cce_1638	Other categories: Other	aldo/keto reductase	0.26	0.0714	-0.3876	-0.1999	-0.7756	-0.2302	-2.7289	0	0	0	0	1	0	1	2	OnlyDuringLaterTimePoints
cce_1748	Other categories: Other	transglycosylase-associated protein	0.312	0.3259	0.1226	0.2326	-0.8676	-0.4038	-0.7257	0	0	0	0	1	0	1	2	OnlyDuringLaterTimePoints
cce_1901	Other categories: Other	putative pathogenesis related protein	0.1372	-0.012	0.1337	-0.0959	0.9563	0.5865	0.6968	0	0	0	0	-1	-1	-1	2	OnlyDuringLaterTimePoints
cce_1920	Other categories: Other	putative glycosyl transferase	0.2012	0.2552	0.0963	-0.6411	-0.104	-0.3023	0.2742	0	0	0	1	0	0	0	2	OnlyDuringLaterTimePoints
cce_2053	Other categories: Other	unknown	-0.0776	-0.2232	-0.0376	-0.0432	-0.7241	-0.3223	-0.377	0	0	0	0	1	0	0	2	OnlyDuringLaterTimePoints
cce_2100	Other categories: Other	probable glycosyl transferase	-0.0623	0.0258	0.2901	-0.1347	0.2854	0.6813	0.2941	0	0	0	0	0	-1	0	2	OnlyDuringLaterTimePoints
cce_2115	Other categories: Other	putative 6-pyruvoyl tetrahydrobiopterin synthase	0.0539	-0.0784	-0.3925	-0.1564	-0.9983	0.0117	-1.5069	0	0	0	0	1	0	1	2	OnlyDuringLaterTimePoints
cce_2215	Other categories: Other	probable retinal pigment epithelial membrane protein	0.2226	0.2663	-0.0148	0.35	0.2242	0.8101	0.1685	0	0	0	0	0	-1	0	2	OnlyDuringLaterTimePoints
cce_2256	Other categories: Other	protein involved in constitutive low affinity CO2 uptake; cupB	0.051	0.2021	0.2879	-0.2399	0.6099	0.2802	1.0335	0	0	0	0	-1	0	-1	2	OnlyDuringLaterTimePoints
cce_2580	Other categories: Other	probable flavoprotein	0.2822	0.445	0.1265	-1.2426	0.243	0.6425	0.4969	0	0	0	1	0	-1	0	2	OnlyDuringLaterTimePoints
cce_2605	Other categories: Other	aminotransferase, class I and II	-0.0382	0.019	-0.1877	-0.4825	1.0651	0.2771	0.8697	0	0	0	0	-1	0	0	2	OnlyDuringLaterTimePoints
cce_2714	Other categories: Other	FAD linked oxidase	0.0784	0.0543	0.0761	0.1207	-0.7027	0.0166	-0.7465	0	0	0	0	1	0	1	2	OnlyDuringLaterTimePoints
cce_2724	Other categories: Other	putative 2-hydroxyhepta-2,4-diene-1,7-dioate isomerase	0.0013	-0.0417	-0.2513	-0.8516	0.3731	0.2077	0.6797	0	0	0	1	0	0	-1	2	OnlyDuringLaterTimePoints
cce_2731	Other categories: Other	probable cyclopropane-fatty-acyl-phospholipid synthase	0.1544	0.0937	-0.1752	0.2032	0.6655	0.6974	0.6164	0	0	0	0	-1	0	0	2	OnlyDuringLaterTimePoints
cce_2756	Other categories: Other	NH(3)-dependent NAD(+) synthetase	0.1077	0.0603	0.0337	-0.0626	-0.6836	0.2312	-0.3896	0	0	0	0	1	0	0	2	OnlyDuringLaterTimePoints
cce_2765	Other categories: Other	probable glutaminase	0.0001	0.0313	0.1615	-0.0218	-0.9819	0.1883	-1.2431	0	0	0	0	1	0	1	2	OnlyDuringLaterTimePoints
cce_2786	Other categories: Other	inositol monophophatase	0.0873	0.0739	-0.111	-1.0145	0.6913	0.0363	0.5365	0	0	0	1	-1	0	0	2	OnlyDuringLaterTimePoints
cce_2819	Other categories: Other	glycosyl transferase, family 2	-0.1932	0.0972	0.4541	-0.0246	-0.0413	-0.3776	0.8351	0	0	0	0	0	0	-1	2	OnlyDuringLaterTimePoints
cce_3001	Other categories: Other	RNA methyltransferase, TrmH family, group 1	-0.2225	-0.0723	-0.3004	-0.4827	-1.0384	-1.2111	-0.6179	0	0	0	0	1	1	1	2	OnlyDuringLaterTimePoints
cce_3028	Other categories: Other	FKBP-type peptidyl-prolyl cis-trans isomerase	0.3	0.1436	-0.0052	-0.626	-0.0009	0.4793	0.6605	0	0	0	1	0	0	-1	2	OnlyDuringLaterTimePoints
cce_3228	Other categories: Other	heterodisulfide reductase, subunit B	0.1365	0.0707	0.191	0.2587	0.3241	0.8662	-0.0779	0	0	0	0	0	-1	0	2	OnlyDuringLaterTimePoints
cce_3237	Other categories: Other	glycosyl transferase, family 2	0.0088	0.3681	-0.0805	0.5422	0.4611	0.6961	0.6132	0	0	0	0	0	-1	-1	2	OnlyDuringLaterTimePoints
cce_3267	Other categories: Other	tmRNA-binding protein; smpB	0.164	-0.0536	-0.0465	-1.0279	-0.8981	0.2191	-1.5695	0	0	0	1	1	0	1	2	OnlyDuringLaterTimePoints
cce_3280	Other categories: Other	aconitate hydratase 2; acnB	0.0729	0.2016	0.1317	1.7597	1.1767	0.4211	0.2546	0	0	0	-1	-1	0	0	2	OnlyDuringLaterTimePoints
cce_3460	Other categories: Other	glycosyl transferase, group 1	0.0796	0.1228	-0.0581	-0.2797	-1.2385	0.192	-2.6398	0	0	0	0	1	0	1	2	OnlyDuringLaterTimePoints
cce_3489	Other categories: Other	TatD-related deoxyribonuclease	0.0154	0.1645	0.0559	0.6492	0.0435	0.3852	-0.3471	0	0	0	-1	0	0	0	2	OnlyDuringLaterTimePoints
cce_3494	Other categories: Other	glycerophosphoryl diester phosphodiesterase	0.2194	0.1259	-0.2181	-0.0623	-0.911	-0.241	-0.3317	0	0	0	0	1	0	0	2	OnlyDuringLaterTimePoints
cce_3547	Other categories: Other	cyclopropane-fatty-acyl-phospholipid synthase	0.0279	0.0226	0.0099	0.3174	0.5859	0.5472	0.4338	0	0	0	0	-1	0	0	2	OnlyDuringLaterTimePoints
cce_3570	Other categories: Other	fibrillin	-0.2116	-0.2593	-0.0222	-0.4861	0.1845	0.0718	0.8099	0	0	0	0	0	0	-1	2	OnlyDuringLaterTimePoints
cce_3587	Other categories: Other	probable zinc-binding oxidoreductase	0.0601	-0.0502	0.064	0.4458	-0.8735	-0.0082	-0.4239	0	0	0	0	1	0	0	2	OnlyDuringLaterTimePoints
cce_3763	Other categories: Other	putative monooxygenase, flavin-binding family	0.258	0.2115	-0.076	-0.1867	-0.4189	-0.0305	-0.5904	0	0	0	0	0	0	1	2	OnlyDuringLaterTimePoints
cce_3848	Other categories: Other	sulfatase	0.1316	0.1635	0.0331	0.0356	-0.6396	-0.2496	-0.109	0	0	0	0	1	0	0	2	OnlyDuringLaterTimePoints
cce_3858	Other categories: Other	sulfatase	-0.1374	-0.1023	0.163	-0.1853	-0.4736	-0.7999	-0.0148	0	0	0	0	0	1	0	2	OnlyDuringLaterTimePoints
cce_3876	Other categories: Other	putative MgtC/SapB transporter	-0.0182	-0.0405	-0.1894	-0.6237	-0.6991	0.0125	-1.0236	0	0	0	1	1	0	1	2	OnlyDuringLaterTimePoints
cce_3934	Other categories: Other	probable short-chain dehydrogenase/reductase SDR	0.0664	-0.2385	-0.2723	-1.0671	0.1044	0.2371	-0.0124	0	0	0	1	0	0	0	2	OnlyDuringLaterTimePoints
cce_3941	Other categories: Other	alpha amylase	0.1672	0.1143	-0.1626	-0.9154	0.7342	0.2236	-0.5382	0	0	0	1	-1	0	0	2	OnlyDuringLaterTimePoints
cce_3958	Other categories: Other	glycosyl transferase, family 2	0.1237	-0.0176	-0.1124	-0.0012	-0.7403	0.3911	-0.6278	0	0	0	0	1	0	1	2	OnlyDuringLaterTimePoints
cce_3974	Other categories: Other	fructose-1,6-bisphosphatase II; glpX	0.1657	0.292	-0.5531	-2.2738	0.2714	-0.0662	1.6006	0	0	0	1	0	0	-1	2	OnlyDuringLaterTimePoints
cce_3977	Other categories: Other	probable retinal pigment epithelial membrane protein	0.1436	0.1113	0.3417	1.2403	-0.1031	-0.1586	0.2841	0	0	0	-1	0	0	0	2	OnlyDuringLaterTimePoints
cce_4049	Other categories: Other	acyl-CoA dehydrogenase	0.0447	0.5448	-0.0578	0.6168	-0.204	0.2217	1.0797	0	0	0	-1	0	0	-1	2	OnlyDuringLaterTimePoints
cce_4076	Other categories: Other	amidase	0.0883	0.1241	-0.159	-0.3685	-0.5883	-0.3593	-0.5898	0	0	0	0	1	0	1	2	OnlyDuringLaterTimePoints
cce_4132	Other categories: Other	c-type cytochrome biogenesis protein; ccs1/ycf44	0.0363	-0.0822	0.2587	0.3711	0.1952	0.634	-0.2165	0	0	0	0	0	-1	0	2	OnlyDuringLaterTimePoints
cce_4234	Other categories: Other	short-chain dehydrogenase/reductase SDR	-0.1191	-0.1251	-0.0101	-0.4587	1.0124	0.0949	0.5979	0	0	0	0	-1	0	-1	2	OnlyDuringLaterTimePoints
cce_4254	Other categories: Other	fructose-bisphosphate aldolase class I; fda	0.1027	0.1617	-0.2124	0.4478	-0.0117	0.3486	-0.6051	0	0	0	0	0	0	1	2	OnlyDuringLaterTimePoints
cce_4374	Other categories: Other	phosphodiesterase/alkaline phosphatase D; phoD	-0.1263	-0.2133	0.2459	-0.1307	0.2873	-0.1845	0.7371	0	0	0	0	0	0	-1	2	OnlyDuringLaterTimePoints
cce_4510	Other categories: Other	squalene-hopene-cyclase; shc	-0.1418	-0.4031	0.3319	1.5118	0.1178	0.6039	0.7443	0	0	0	-1	0	0	-1	2	OnlyDuringLaterTimePoints
cce_4571	Other categories: Other	sulfolipid biosynthesis protein; sqdB	-0.1336	-0.108	-0.0866	-2.208	1.0464	0.082	2.024	0	0	0	1	-1	0	-1	2	OnlyDuringLaterTimePoints
cce_4725	Other categories: Other	probable sulfotransferase	-0.0387	0.0624	0.1019	-0.1931	0.6667	0.0666	0.4029	0	0	0	0	-1	0	0	2	OnlyDuringLaterTimePoints
cce_4739	Other categories: Other	putative zinc-binding oxidoreductase	0.0526	-0.1451	-0.2344	-0.8466	0.1212	-0.1257	0.0942	0	0	0	1	0	0	0	2	OnlyDuringLaterTimePoints
cce_4742	Other categories: Other	FraH-like protein	0.2459	0.1849	-0.3172	-0.0185	0.2447	0.0156	-0.9013	0	0	0	0	0	0	1	2	OnlyDuringLaterTimePoints
cce_4821	Other categories: Other	5-methyltetrahydropteroyltriglutamate--homocysteine S-methyltransferase; metE	0.3083	0.3228	0.1484	0.5202	-0.4431	0.9551	2.3883	0	0	0	0	0	0	-1	2	OnlyDuringLaterTimePoints
cce_5037	Other categories: Other	probable HicB protein; hicB	0.0838	-0.0766	-0.2228	-0.6383	0.5984	-0.158	0.2871	0	0	0	1	-1	0	0	2	OnlyDuringLaterTimePoints
cce_5038	Other categories: Other	probable HicA protein; hicA	-0.0994	-0.1735	-0.2543	-0.9425	0.3251	-0.7165	0.5706	0	0	0	1	0	0	0	2	OnlyDuringLaterTimePoints
cce_5087	Other categories: Other	probable short-chain dehydrogenase/reductase SDR	0.0211	-0.2176	-0.1732	-0.6107	-0.0947	-0.1257	0.3309	0	0	0	1	0	0	0	2	OnlyDuringLaterTimePoints
cce_0107	Other categories: Transposon-related functions	reverse transcriptase	-0.041	-0.1762	0.1778	0.2843	-0.8171	-0.9243	-0.1843	0	0	0	0	1	1	0	2	OnlyDuringLaterTimePoints
cce_0410	Other categories: Transposon-related functions	reverse transcriptase	-0.2065	0.1576	0.0403	0.1396	-0.4927	-0.5071	-1.6037	0	0	0	0	0	0	1	2	OnlyDuringLaterTimePoints
cce_0638	Other categories: Transposon-related functions	putative reverse transcriptase	0.2595	0.2881	-0.3606	0.6762	-0.6504	-0.4052	-0.6976	0	0	0	-1	1	0	1	2	OnlyDuringLaterTimePoints
cce_1950	Other categories: Transposon-related functions	transposase	0.3293	0.0907	-0.1864	-0.0417	-0.3357	-0.502	-0.6289	0	0	0	0	0	0	1	2	OnlyDuringLaterTimePoints
cce_2083	Other categories: Transposon-related functions	transposase	-0.0469	0.1068	0.1065	-0.1419	-0.2002	0.6266	0.3258	0	0	0	0	0	-1	0	2	OnlyDuringLaterTimePoints
cce_2828	Other categories: Transposon-related functions	reverse transcriptase	-0.374	-0.1396	-0.543	1.3876	-3.8749	-3.2302	-4.6298	0	0	0	0	1	1	0	2	OnlyDuringLaterTimePoints
cce_2978	Other categories: Transposon-related functions	putative transposase	0.0353	0.0128	-0.1569	0.2482	-0.6771	0.2313	-0.0839	0	0	0	0	1	0	0	2	OnlyDuringLaterTimePoints
cce_3718	Other categories: Transposon-related functions	putative transposase	0.0151	-0.1589	0.1117	0.0797	-0.8039	-0.3132	-0.7564	0	0	0	0	1	0	1	2	OnlyDuringLaterTimePoints
cce_3808	Other categories: Transposon-related functions	transposase	0.1607	-0.0047	0.0141	0.1588	-0.7689	-0.0949	-0.5277	0	0	0	0	1	0	0	2	OnlyDuringLaterTimePoints
cce_3851	Other categories: Transposon-related functions	transposase	0.0298	-0.0526	-0.0751	0.0178	-0.7807	-0.6648	-0.4332	0	0	0	0	0	1	0	2	OnlyDuringLaterTimePoints
cce_4232	Other categories: Transposon-related functions	transposase	-0.4059	-0.3811	0.1707	-0.0627	-0.0059	-0.905	0.2179	0	0	0	0	0	1	0	2	OnlyDuringLaterTimePoints
cce_4663	Other categories: Transposon-related functions	reverse transcriptase	0.1563	0.0299	-0.352	2.4284	-1.6913	-1.2345	-2.7745	0	0	0	-1	1	1	1	2	OnlyDuringLaterTimePoints
cce_4765	Other categories: Transposon-related functions	reverse transcriptase	-0.1576	0.1499	-0.5517	1.035	-3.192	-2.3797	-3.9361	0	0	0	0	1	1	0	2	OnlyDuringLaterTimePoints
cce_4963	Other categories: Transposon-related functions	putative transposase	-0.0077	-0.1513	-0.066	-0.0258	-0.4029	-0.3997	-0.6254	0	0	0	0	0	0	1	2	OnlyDuringLaterTimePoints
cce_5039	Other categories: Transposon-related functions	integrase/recombinase	0.02	-0.0426	-0.4259	-0.5155	0.1298	-0.4912	-1.2711	0	0	0	0	0	0	1	2	OnlyDuringLaterTimePoints
cce_5089	Other categories: Transposon-related functions	putative transposase	0.0581	-0.0779	0.103	-0.364	-0.2185	-0.2946	-0.6632	0	0	0	0	0	0	1	2	OnlyDuringLaterTimePoints
cce_5193	Other categories: Transposon-related functions	putative transposase	0.315	0.0613	-0.4282	-0.5466	-0.8104	-0.3621	-1.5603	0	0	0	0	1	0	1	2	OnlyDuringLaterTimePoints
cce_5233	Other categories: Transposon-related functions	phage integrase	-0.1373	-0.4867	0.0161	-0.5769	-0.1957	-0.9185	0.3681	0	0	0	0	0	1	0	2	OnlyDuringLaterTimePoints
cce_5279	Other categories: Transposon-related functions	integrase/recombinase	-0.3207	-0.3691	0.1223	-0.7279	-0.2896	-0.6693	0.7076	0	0	0	1	0	1	0	2	OnlyDuringLaterTimePoints
cce_5289	Other categories: Transposon-related functions	integrase/recombinase	-0.0812	-0.2598	-0.0014	0.2566	-0.1289	-0.5083	-0.9257	0	0	0	0	0	0	1	2	OnlyDuringLaterTimePoints
cce_5294	Other categories: Transposon-related functions	integrase/recombinase	-0.0355	-0.1367	-0.1909	-0.6432	0.5079	0.127	0.0301	0	0	0	1	0	0	0	2	OnlyDuringLaterTimePoints
cce_5300	Other categories: Transposon-related functions	probable integrase/recombinase	-0.0023	-0.1201	-0.3807	-0.0838	0.3303	-0.0577	-0.7614	0	0	0	0	0	0	1	2	OnlyDuringLaterTimePoints
cce_2196	Other categories: WD repeat proteins	WD-repeat protein	0.0529	-0.1002	-0.1264	-0.1239	-0.6435	-0.0989	-0.1986	0	0	0	0	1	0	0	2	OnlyDuringLaterTimePoints
cce_3581	Other categories: WD repeat proteins	WD-40 repeat protein	0.1438	0.1799	-0.2773	0.731	-0.0907	0.3182	-0.2471	0	0	0	-1	0	0	0	2	OnlyDuringLaterTimePoints
cce_1345	Photosynthesis and respiration: ATP synthase	ATP synthase gamma subunit-like protein	-0.1524	-0.3608	-0.2912	0.2886	0.3563	-0.1366	1.0159	0	0	0	0	0	0	-1	2	OnlyDuringLaterTimePoints
cce_1511	Photosynthesis and respiration: ATP synthase	putative ATP synthase delta/epsilon subunit	0.2627	0.1196	0.21	-0.0541	0.3827	-0.0254	-0.807	0	0	0	0	0	0	1	2	OnlyDuringLaterTimePoints
cce_2812	Photosynthesis and respiration: ATP synthase	ATP synthase epsilon subunit; atpE	-0.1415	0.1863	0.1754	-1.2996	1.3801	0.5055	2.1902	0	0	0	1	-1	0	-1	2	OnlyDuringLaterTimePoints
cce_2813	Photosynthesis and respiration: ATP synthase	ATP synthase F1, beta subunit; atpB1	0.007	0.1597	0.0425	-1.1558	1.2031	0.6429	1.5398	0	0	0	1	-1	-1	-1	2	OnlyDuringLaterTimePoints
cce_4483	Photosynthesis and respiration: ATP synthase	ATP synthase F0, A subunit; atpI	-0.0051	0.2019	0.4012	-0.7173	0.8323	0.534	2.6254	0	0	0	1	-1	0	-1	2	OnlyDuringLaterTimePoints
cce_4484	Photosynthesis and respiration: ATP synthase	ATP synthase F0, C subunit; atpH	0.1222	0.0612	0.1927	-1.294	0.4799	0.5186	1.9558	0	0	0	1	0	0	-1	2	OnlyDuringLaterTimePoints
cce_4485	Photosynthesis and respiration: ATP synthase	ATP synthase F0, B' subunit; atpG	0.1497	0.0974	0.0819	-1.5814	0.9767	0.1786	2.2422	0	0	0	1	-1	0	-1	2	OnlyDuringLaterTimePoints
cce_4486	Photosynthesis and respiration: ATP synthase	ATP synthase F0, B subunit; atpF	0.1984	0.2329	0.1217	-1.4921	1.1251	0.3905	2.4358	0	0	0	1	-1	0	-1	2	OnlyDuringLaterTimePoints
cce_4487	Photosynthesis and respiration: ATP synthase	ATP synthase delta subunit; atpD	0.2218	0.2708	0.2055	-1.388	1.2226	0.4605	2.525	0	0	0	1	-1	0	-1	2	OnlyDuringLaterTimePoints
cce_4488	Photosynthesis and respiration: ATP synthase	ATP synthase F1, alpha subunit; atpA1	0.1575	0.2595	0.2657	-1.3788	1.2181	0.4236	2.4411	0	0	0	1	-1	0	-1	2	OnlyDuringLaterTimePoints
cce_4489	Photosynthesis and respiration: ATP synthase	ATP synthase gamma subunit; atpC1	-0.0052	0.1317	0.3276	-1.6447	0.7134	0.3861	2.5681	0	0	0	1	-1	0	-1	2	OnlyDuringLaterTimePoints
cce_0871	Photosynthesis and respiration: CO2 fixation	beta-carbonic anhydrase, periplasmic; icfA2	0.0267	0.0215	0.1039	0.7032	0.0861	-0.1466	-0.4155	0	0	0	-1	0	0	0	2	OnlyDuringLaterTimePoints
cce_0995	Photosynthesis and respiration: CO2 fixation	phosphoribulokinase; prk	0.2405	0.4586	-0.0003	-1.2339	-0.3773	-0.2397	1.1086	0	0	0	1	0	0	-1	2	OnlyDuringLaterTimePoints
cce_2257	Photosynthesis and respiration: CO2 fixation	beta-carbonic anhydrase, carboxysomal; icfA1	-0.3377	0.2369	-0.1677	-0.2693	1.0453	-0.0225	1.1525	0	0	0	0	-1	0	-1	2	OnlyDuringLaterTimePoints
cce_2433	Photosynthesis and respiration: CO2 fixation	carbon dioxide concentrating mechanism protein; ccmK4	0.0676	0.181	-0.1009	-0.753	0.3103	-0.1354	0.3454	0	0	0	1	0	0	0	2	OnlyDuringLaterTimePoints
cce_3366	Photosynthesis and respiration: CO2 fixation	carboxysome formation protein; ccmA	0.2117	0.1833	-0.0204	0.21	1.3862	0.1687	0.9405	0	0	0	0	-1	0	-1	2	OnlyDuringLaterTimePoints
cce_4304	Photosynthesis and respiration: CO2 fixation	triosephosphate isomerase; tpi	-0.1536	0.048	0.0692	-0.199	-0.8222	-0.5063	-0.2349	0	0	0	0	1	0	0	2	OnlyDuringLaterTimePoints
cce_1384	Photosynthesis and respiration: Cytochrome b6/f complex	cytochrome b6-f complex subunit 4; petD	0.2597	0.0331	0.0085	0.1705	-0.164	0.7334	-0.0796	0	0	0	0	0	-1	0	2	OnlyDuringLaterTimePoints
cce_2791	Photosynthesis and respiration: Cytochrome b6/f complex	putative cytochrome b6-f complex subunit; petM	0.0059	-0.1224	0.3436	-0.5116	0.1921	-0.1644	0.971	0	0	0	0	0	0	-1	2	OnlyDuringLaterTimePoints
cce_2958	Photosynthesis and respiration: Cytochrome b6/f complex	cytochrome b6-f complex Rieske iron-sulfur subunit, plastoquinol--plastocyanin reductase; petC1	0.4131	0.2719	-0.3806	-1.2239	0.7804	-0.1374	1.3	0	0	0	1	-1	0	-1	2	OnlyDuringLaterTimePoints
cce_2959	Photosynthesis and respiration: Cytochrome b6/f complex	apocytochrome f component of cytochrome b6-f complex; petA	0.3707	0.1345	-0.4466	-1.4573	0.7387	0.1451	1.3553	0	0	0	1	-1	0	-1	2	OnlyDuringLaterTimePoints
cce_3265	Photosynthesis and respiration: Cytochrome b6/f complex	cytochrome b6-f complex subunit 5; petG	0.1005	0.2012	0.3077	-0.6079	-2.0299	-0.0723	-1.7365	0	0	0	1	1	0	1	2	OnlyDuringLaterTimePoints
cce_3410	Photosynthesis and respiration: Cytochrome b6/f complex	cytochrome b6-f complex Rieske iron-sulfur protein, plastoquinol--plastocyanin reductase; petC2	0.0904	0.0998	-0.1268	-0.674	0.3617	-0.028	0.0951	0	0	0	1	0	0	0	2	OnlyDuringLaterTimePoints
cce_0154	Photosynthesis and respiration: NADH dehydrogenase	type 2 NADH dehydrogenase; ndbB	-0.0114	-0.1415	-0.2671	0.7123	0.7059	0.1984	0.2331	0	0	0	-1	-1	0	0	2	OnlyDuringLaterTimePoints
cce_0624	Photosynthesis and respiration: NADH dehydrogenase	FAD-dependent pyridine nucleotide-disulphide oxidoreductase	0.0888	0.1026	0.0061	0.7611	-0.2709	0.0726	0.0738	0	0	0	-1	0	0	0	2	OnlyDuringLaterTimePoints
cce_1176	Photosynthesis and respiration: NADH dehydrogenase	NADH dehydrogenase subunit 2; ndhB	0.251	0.142	0.2929	0.9919	0.1578	0.5286	-0.0026	0	0	0	-1	0	0	0	2	OnlyDuringLaterTimePoints
cce_1685	Photosynthesis and respiration: NADH dehydrogenase	NADH dehydrogenase subunit 4-like protein	-0.0647	0.2882	-0.1555	-0.1187	-0.1276	-1.2103	0.4997	0	0	0	0	0	1	0	2	OnlyDuringLaterTimePoints
cce_1690	Photosynthesis and respiration: NADH dehydrogenase	NADH dehydrogenase subunit 4; ndhD5	0.1561	0.3048	-0.5101	-0.4297	-0.6705	-0.1309	0.2939	0	0	0	0	1	0	0	2	OnlyDuringLaterTimePoints
cce_1762	Photosynthesis and respiration: NADH dehydrogenase	NADH dehydrogenase subunit J; ndhJ	0.3726	0.1005	-0.1114	0.8569	-0.161	0.8021	-0.3464	0	0	0	-1	0	-1	0	2	OnlyDuringLaterTimePoints
cce_1763	Photosynthesis and respiration: NADH dehydrogenase	NADH dehydrogenase subunit K; ndhK	0.3242	0.0923	-0.3007	0.7551	1.3626	0.505	-0.224	0	0	0	-1	-1	0	0	2	OnlyDuringLaterTimePoints
cce_1764	Photosynthesis and respiration: NADH dehydrogenase	NADH dehydrogenase subunit 3; ndhC	0.3405	0.1873	-0.1628	0.6308	0.985	0.5181	0.9394	0	0	0	-1	-1	0	-1	2	OnlyDuringLaterTimePoints
cce_2221	Photosynthesis and respiration: NADH dehydrogenase	NADH dehydrogenase subunit 4L; ndhE	0.2848	0.4164	0.3784	0.5054	0.7571	0.3418	1.3718	0	0	0	0	-1	0	-1	2	OnlyDuringLaterTimePoints
cce_2222	Photosynthesis and respiration: NADH dehydrogenase	NADH dehydrogenase subunit 6; ndhG	0.2994	0.3305	0.1335	0.4287	1.0651	0.462	1.2878	0	0	0	0	-1	0	-1	2	OnlyDuringLaterTimePoints
cce_2223	Photosynthesis and respiration: NADH dehydrogenase	NADH dehydrogenase subunit I; ndhI	0.2379	0.2617	0.2243	0.6615	0.2697	-0.292	1.2609	0	0	0	-1	0	0	-1	2	OnlyDuringLaterTimePoints
cce_2224	Photosynthesis and respiration: NADH dehydrogenase	NADH dehydrogenase subunit 1; ndhA	0.3247	0.3477	0.0068	0.5992	0.8126	0.2789	1.1929	0	0	0	-1	-1	0	-1	2	OnlyDuringLaterTimePoints
cce_4103	Photosynthesis and respiration: NADH dehydrogenase	FAD-dependent pyridine nucleotide-disulphide oxidoreductase	0.2798	0.1901	0.0036	0.9989	-0.6263	-0.2977	-0.6531	0	0	0	-1	1	0	1	2	OnlyDuringLaterTimePoints
cce_4299	Photosynthesis and respiration: NADH dehydrogenase	NADH dehydrogenase subunit 4; ndhD1	0.3232	0.2129	0.4569	1.578	0.7826	0.4766	0.3742	0	0	0	-1	-1	0	0	2	OnlyDuringLaterTimePoints
cce_0285	Photosynthesis and respiration: Photosystem I	photosystem I assembly related protein; ycf3	0.0717	0.1469	-0.3452	-0.0215	0.2998	0.6152	0.093	0	0	0	0	0	-1	0	2	OnlyDuringLaterTimePoints
cce_0400	Photosynthesis and respiration: Photosystem I	photosystem I reaction center subunit X; psaK1	0.42	0.3406	-0.1656	-0.3022	-1.086	-1.0257	-0.2602	0	0	0	0	1	1	0	2	OnlyDuringLaterTimePoints
cce_1341	Photosynthesis and respiration: Photosystem I	photosystem I reaction center subunit II; psaD	0.0633	0.2446	-0.0686	-0.632	-0.4832	-0.6596	1.8021	0	0	0	1	0	1	-1	2	OnlyDuringLaterTimePoints
cce_1747	Photosynthesis and respiration: Photosystem I	photosystem I iron-sulfur center subunit VII; psaC	0.5659	0.3676	-0.2186	-0.5193	-1.0293	-0.5586	0.1947	0	0	0	0	1	0	0	2	OnlyDuringLaterTimePoints
cce_1973	Photosynthesis and respiration: Photosystem I	photosystem I biogenesis protein; btpA	0.026	-0.3334	-0.2371	-1.7848	0.1774	-0.5937	0.7321	0	0	0	1	0	1	-1	2	OnlyDuringLaterTimePoints
cce_2172	Photosynthesis and respiration: Photosystem I	photosystem I assembly protein; ycf4	0.1958	0.0789	-0.3613	-1.0253	1.3565	0.3293	0.7233	0	0	0	1	-1	0	-1	2	OnlyDuringLaterTimePoints
cce_3964	Photosynthesis and respiration: Photosystem I	photosystem I reaction centre subunit XI PsaL; psaL1	0.3498	0.2045	-0.2472	-1.6154	-0.997	-0.8871	-0.6807	0	0	0	1	1	1	1	2	OnlyDuringLaterTimePoints
cce_4273	Photosynthesis and respiration: Photosystem I	photosystem I reaction center subunit XII; psaM	0.194	0.461	0.0985	-0.7878	-0.7021	-0.5868	0.497	0	0	0	1	1	1	0	2	OnlyDuringLaterTimePoints
cce_4325	Photosynthesis and respiration: Photosystem I	photosystem I reaction center subunit IV; psaE	0.0514	0.1142	0.3474	0.1759	-1.0927	-0.441	-0.0579	0	0	0	0	1	0	0	2	OnlyDuringLaterTimePoints
cce_4576	Photosynthesis and respiration: Photosystem I	photosystem I assembly protein; ycf37	0.1889	0.1294	0.2416	-0.4357	0.9791	0.1682	0.7133	0	0	0	0	-1	0	-1	2	OnlyDuringLaterTimePoints
cce_0636	Photosynthesis and respiration: Photosystem II	photosystem II D1 protein; psbA5	0.276	-0.3086	-0.3727	0.1827	0.6454	-0.0793	1.0107	0	0	0	0	0	0	-1	2	OnlyDuringLaterTimePoints
cce_0659	Photosynthesis and respiration: Photosystem II	photosystem II CP43 protein, chlorophyll-binding protein CP43; psbC	0.2225	-0.0042	-0.2213	-0.2599	-0.0071	0.6932	-0.1541	0	0	0	0	0	-1	0	2	OnlyDuringLaterTimePoints
cce_0893	Photosynthesis and respiration: Photosystem II	photosystem II reaction center M protein; psbM	0.0318	-0.0011	0.1564	-0.2374	-1.0208	0.1238	-0.2402	0	0	0	0	1	0	0	2	OnlyDuringLaterTimePoints
cce_1303	Photosynthesis and respiration: Photosystem II	photosystem II protein J; psbJ	0.2685	0.3225	0.0053	-0.397	-0.843	-0.0448	-1.2149	0	0	0	0	1	0	1	2	OnlyDuringLaterTimePoints
cce_1304	Photosynthesis and respiration: Photosystem II	photosystem II protein L; psbL	0.288	0.3506	-0.1713	-0.5559	-0.6429	0.1087	-1.1614	0	0	0	0	1	0	1	2	OnlyDuringLaterTimePoints
cce_1305	Photosynthesis and respiration: Photosystem II	photosystem II cytochrome b559 beta subunit; psbF	0.3022	0.4038	-0.1563	-0.5279	-0.6386	0.0003	-1.0235	0	0	0	0	1	0	1	2	OnlyDuringLaterTimePoints
cce_1307	Photosynthesis and respiration: Photosystem II	photosystem II cytochrome b559 alpha subunit; psbE	0.3308	0.3518	-0.2555	-0.5076	-0.2204	0.0072	-0.764	0	0	0	0	0	0	1	2	OnlyDuringLaterTimePoints
cce_1308	Photosynthesis and respiration: Photosystem II	probable photosystem II stability/assembly factor	0.3008	0.2399	-0.5623	-0.7841	-0.5661	-0.7486	-0.8409	0	0	0	1	0	1	1	2	OnlyDuringLaterTimePoints
cce_1526	Photosynthesis and respiration: Photosystem II	photosystem II protein Y; psbY	-0.0193	0.0659	0.0049	-1.1302	-1.3941	-0.0451	-0.5393	0	0	0	1	1	0	0	2	OnlyDuringLaterTimePoints
cce_1599	Photosynthesis and respiration: Photosystem II	photosystem II 13 kD protein; psb28	-0.0696	-0.1471	-0.187	-1.0246	0.3136	-0.2231	1.2461	0	0	0	1	0	0	-1	2	OnlyDuringLaterTimePoints
cce_1785	Photosynthesis and respiration: Photosystem II	iron-stress chlorophyll-binding protein, photosystem II CP43 protein; isiA	-0.2193	-0.3914	0.3439	2.0565	1.2692	0.2769	0.3348	0	0	0	-1	-1	0	0	2	OnlyDuringLaterTimePoints
cce_2485	Photosynthesis and respiration: Photosystem II	photosystem II D2 protein; psbD2	0.1911	-0.0636	-0.1755	-0.3428	-0.5991	0.3456	-1.8691	0	0	0	0	1	0	1	2	OnlyDuringLaterTimePoints
cce_2572	Photosynthesis and respiration: Photosystem II	photosystem II manganese-stabilizing polypeptide, 33 kD extrinsic protein; psbO	0.2593	0.2643	-0.1618	-0.3923	-0.6161	-0.3705	1.1846	0	0	0	0	1	0	-1	2	OnlyDuringLaterTimePoints
cce_2625	Photosynthesis and respiration: Photosystem II	photosystem II 12 kD extrinsic protein; psbU	0.3253	0.2538	0.0723	-1.0455	-0.491	-0.0606	0.0591	0	0	0	1	0	0	0	2	OnlyDuringLaterTimePoints
cce_2792	Photosynthesis and respiration: Photosystem II	photosystem II 13 kD protein; psb28-2	0.0058	-0.117	0.2507	-0.7741	0.8882	-0.1178	0.9741	0	0	0	1	-1	0	-1	2	OnlyDuringLaterTimePoints
cce_2955	Photosynthesis and respiration: Photosystem II	photosystem II extrinsic protein, cytochrome c550; psbV	0.5455	0.3666	-0.4728	-1.6867	-0.0217	-0.8694	1.5423	0	0	0	1	0	1	-1	2	OnlyDuringLaterTimePoints
cce_3394	Photosynthesis and respiration: Photosystem II	photosystem II protein I; psbI	0.1376	0.1249	0.2717	-0.0345	-0.6903	0.7472	0.0814	0	0	0	0	1	-1	0	2	OnlyDuringLaterTimePoints
cce_3411	Photosynthesis and respiration: Photosystem II	photosystem II D1 protein; psbA2	0.0435	-0.0127	-0.2691	-1.2001	0.2762	-0.3623	0.4409	0	0	0	1	0	0	0	2	OnlyDuringLaterTimePoints
cce_3414	Photosynthesis and respiration: Photosystem II	cytochrome D ubiquinol oxidase chain II; cydB	0.0016	0.2206	0.3067	0.6045	0.3327	0.5519	0.1545	0	0	0	-1	0	0	0	2	OnlyDuringLaterTimePoints
cce_3633	Photosynthesis and respiration: Photosystem II	photosystem II 11 kD protein; psb27	-0.184	0.2061	-0.0405	-1.0883	-0.6162	0.1375	1.5786	0	0	0	1	1	0	-1	2	OnlyDuringLaterTimePoints
cce_4518	Photosynthesis and respiration: Photosystem II	photosystem II protein; psbK	0.178	0.2587	0.5722	-0.5993	-0.9685	-0.3756	-0.0882	0	0	0	1	1	0	0	2	OnlyDuringLaterTimePoints
cce_0099	Photosynthesis and respiration: Phycobilisome	probable phycobilisome degradation protein; nblA1	-0.2844	-0.2285	-0.212	1.4168	0.7881	1.0564	0.2404	0	0	0	-1	-1	-1	0	2	OnlyDuringLaterTimePoints
cce_0100	Photosynthesis and respiration: Phycobilisome	probable phycobilisome degradation protein; nblA2	-0.2828	-0.1499	-0.0589	1.5484	0.8841	0.9324	0.3338	0	0	0	-1	-1	-1	0	2	OnlyDuringLaterTimePoints
cce_1944	Photosynthesis and respiration: Phycobilisome	phycobilisome core component; apcF	0.3574	0.2174	-0.048	-0.9756	-0.2628	-0.1561	0.4061	0	0	0	1	0	0	0	2	OnlyDuringLaterTimePoints
cce_2308	Photosynthesis and respiration: Phycobilisome	phycocyanin alpha-subunit phycocyanobilin lyase; cpcF	-0.0919	-0.0849	0.2536	-1.1403	0.4631	0.0993	0.7211	0	0	0	1	0	0	-1	2	OnlyDuringLaterTimePoints
cce_2911	Photosynthesis and respiration: Phycobilisome	phycobilisome LC linker polypeptide; apcC	0.5004	0.1256	0.0319	-1.0225	0.0423	-0.5123	1.4774	0	0	0	1	0	0	-1	2	OnlyDuringLaterTimePoints
cce_3208	Photosynthesis and respiration: Phycobilisome	phycobilisome rod-core linker polypeptide; cpcG	0.2918	0.3064	-0.2461	-0.9941	0.4354	-0.1141	1.0783	0	0	0	1	0	0	0	2	OnlyDuringLaterTimePoints
cce_3386	Photosynthesis and respiration: Phycobilisome	phycocyanin alpha phycocyanobilin lyase related protein; nblB	-0.0569	0.3581	-0.1356	-0.4143	-0.6862	0.4491	-0.5054	0	0	0	0	1	0	0	2	OnlyDuringLaterTimePoints
cce_4109	Photosynthesis and respiration: Respiratory terminal oxidases	cytochrome c oxidase subunit II; coxB3/ctaC3	0.0613	0.1369	0.3735	1.9521	0.4094	-0.1144	0.7174	0	0	0	-1	0	0	-1	2	OnlyDuringLaterTimePoints
cce_4110	Photosynthesis and respiration: Respiratory terminal oxidases	cytochrome c oxidase subunit I; coxA3/ctaD3	0.2197	0.2481	0.292	1.7564	0.2598	0.0693	0.3713	0	0	0	-1	0	0	0	2	OnlyDuringLaterTimePoints
cce_4111	Photosynthesis and respiration: Respiratory terminal oxidases	cytochrome c oxidase subunit III; coxC3/ctaE3	0.1211	0.2836	0.5006	1.4044	0.0407	0.1088	0.544	0	0	0	-1	0	0	0	2	OnlyDuringLaterTimePoints
cce_4813	Photosynthesis and respiration: Respiratory terminal oxidases	cytochrome c oxidase subunit III; coxC2/ctaE2	0.0979	0.0757	0.1488	0.7747	0.1293	0.0682	0.2023	0	0	0	-1	0	0	0	2	OnlyDuringLaterTimePoints
cce_4814	Photosynthesis and respiration: Respiratory terminal oxidases	cytochrome c oxidase subunit I; coxA2/ctaD2	0.1963	0.08	0.1863	0.7354	0.1963	-0.1279	0.1083	0	0	0	-1	0	0	0	2	OnlyDuringLaterTimePoints
cce_4815	Photosynthesis and respiration: Respiratory terminal oxidases	cytochrome c oxidase subunit II; coxB2/ctaC2	0.1524	0.1152	0.2453	0.9906	0.1323	-0.1504	0.2651	0	0	0	-1	0	0	0	2	OnlyDuringLaterTimePoints
cce_0590	Photosynthesis and respiration: Soluble electron carriers	plastocyanin; petE	0.0642	-0.1438	-0.2689	-1.0619	-0.2503	0.0091	-0.5249	0	0	0	1	0	0	0	2	OnlyDuringLaterTimePoints
cce_0892	Photosynthesis and respiration: Soluble electron carriers	probable ferredoxin	-0.0028	-0.1584	-0.2364	0.2234	-0.8272	0.4385	-0.8108	0	0	0	0	1	0	1	2	OnlyDuringLaterTimePoints
cce_0953	Photosynthesis and respiration: Soluble electron carriers	pyruvate oxidoreductase; nifJ	-0.0221	0.0273	0.3173	0.5526	1.1394	0.0916	0.4144	0	0	0	0	-1	0	0	2	OnlyDuringLaterTimePoints
cce_0971	Photosynthesis and respiration: Soluble electron carriers	probable 4Fe-4S ferredoxin, iron-sulfur binding	0.2546	0.0496	-0.1068	0.0953	-0.9422	0.082	-0.8674	0	0	0	0	1	0	1	2	OnlyDuringLaterTimePoints
cce_0994	Photosynthesis and respiration: Soluble electron carriers	ferredoxin-NADP oxidoreductase; petH	0.3123	0.4123	0.3831	1.5251	2.065	0.816	2.104	0	0	0	-1	-1	-1	-1	2	OnlyDuringLaterTimePoints
cce_1313	Photosynthesis and respiration: Soluble electron carriers	flavodoxin; isiB2	-0.0305	0.0881	0.2763	0.8085	1.7413	-0.9527	-0.2657	0	0	0	-1	-1	1	0	2	OnlyDuringLaterTimePoints
cce_3031	Photosynthesis and respiration: Soluble electron carriers	flavodoxin; isiB1	-0.0606	-0.4629	-0.2841	0.0547	1.6579	0.4024	0.1898	0	0	0	0	-1	0	0	2	OnlyDuringLaterTimePoints
cce_3264	Photosynthesis and respiration: Soluble electron carriers	cytochrome cM; cytM	0.1589	-0.0352	-0.0381	-0.7921	-0.1444	-0.2392	-0.7845	0	0	0	1	0	0	1	2	OnlyDuringLaterTimePoints
cce_3398	Photosynthesis and respiration: Soluble electron carriers	ferredoxin thioredoxin reductase catalytic chain; ftrC	0.0169	0.2239	-0.4083	0.3009	0.8158	0.2275	0.7999	0	0	0	0	-1	0	-1	2	OnlyDuringLaterTimePoints
cce_0688	Purines, pyrimidines, nucleosides, and nucleotides: Interconversions and salvage of nucleosides and nucleotides	nucleoside diphosphate kinase; ndk	-0.1609	-0.2894	0.0901	-1.1319	0.6646	-0.5161	1.1664	0	0	0	1	-1	0	-1	2	OnlyDuringLaterTimePoints
cce_1274	Purines, pyrimidines, nucleosides, and nucleotides: Interconversions and salvage of nucleosides and nucleotides	putative cytidine/deoxycytidylate deaminase	0.002	-0.026	0.3187	0.0411	-0.6262	-0.0265	0.3823	0	0	0	0	1	0	0	2	OnlyDuringLaterTimePoints
cce_2643	Purines, pyrimidines, nucleosides, and nucleotides: Interconversions and salvage of nucleosides and nucleotides	glycine cleavage system protein H; gcvH	-0.1389	-0.1739	0.0968	-0.839	0.4051	-0.0339	1.1269	0	0	0	1	0	0	-1	2	OnlyDuringLaterTimePoints
cce_4034	Purines, pyrimidines, nucleosides, and nucleotides: Interconversions and salvage of nucleosides and nucleotides	adenylate kinase; adk	-0.0298	-0.1714	0.4236	-1.0634	0.9976	0.619	0.4864	0	0	0	1	-1	-1	0	2	OnlyDuringLaterTimePoints
cce_4253	Purines, pyrimidines, nucleosides, and nucleotides: Interconversions and salvage of nucleosides and nucleotides	uracil phosphoribosyltransferase/pyrimidine operon regulatory protein; pyrR	0.2844	0.1208	-0.1999	-0.3259	0.0467	0.0401	-0.6972	0	0	0	0	0	0	1	2	OnlyDuringLaterTimePoints
cce_4591	Purines, pyrimidines, nucleosides, and nucleotides: Interconversions and salvage of nucleosides and nucleotides	guanylate kinase; gmk	-0.077	-0.0414	-0.2465	0.6645	0.0241	0.4023	-0.7364	0	0	0	-1	0	0	1	2	OnlyDuringLaterTimePoints
cce_0426	Purines, pyrimidines, nucleosides, and nucleotides: Purine ribonucleotide biosynthesis	phosphoribosylglycinamide formyltransferase; purN	-0.1998	0.0499	-0.0387	0.7942	0.5266	-0.067	0.7995	0	0	0	-1	0	0	-1	2	OnlyDuringLaterTimePoints
cce_1084	Purines, pyrimidines, nucleosides, and nucleotides: Purine ribonucleotide biosynthesis	phosphoribosylglycinamide synthetase; purD	-0.2388	-0.1908	0.4064	-0.8089	0.8552	0.0003	1.0104	0	0	0	1	-1	0	-1	2	OnlyDuringLaterTimePoints
cce_1210	Purines, pyrimidines, nucleosides, and nucleotides: Purine ribonucleotide biosynthesis	phosphoribosylformylglycinamidine synthase II; purL	-0.0292	-0.0276	0.1774	-0.5592	0.6017	0.1609	0.6375	0	0	0	0	-1	0	-1	2	OnlyDuringLaterTimePoints
cce_1211	Purines, pyrimidines, nucleosides, and nucleotides: Purine ribonucleotide biosynthesis	amidophosphoribosyl transferase	0.2102	0.1471	0.2615	0.439	0.8124	0.8654	0.5509	0	0	0	0	-1	-1	0	2	OnlyDuringLaterTimePoints
cce_1354	Purines, pyrimidines, nucleosides, and nucleotides: Purine ribonucleotide biosynthesis	ribonucleoside-diphosphate reductase alpha subunit; nrdA	0.0383	0.3627	0.2483	1.2782	1.091	-0.0987	1.9693	0	0	0	-1	-1	0	-1	2	OnlyDuringLaterTimePoints
cce_1999	Purines, pyrimidines, nucleosides, and nucleotides: Purine ribonucleotide biosynthesis	rod shape-determining protein; mreC	-0.1724	-0.2672	-0.1269	0.2084	-0.6505	0.537	-0.5247	0	0	0	0	1	0	0	2	OnlyDuringLaterTimePoints
cce_3209	Purines, pyrimidines, nucleosides, and nucleotides: Purine ribonucleotide biosynthesis	IMP dehydrogenase; guaB	-0.0573	0.0805	-0.4689	-0.9469	0.2136	-0.2023	0.0224	0	0	0	1	0	0	0	2	OnlyDuringLaterTimePoints
cce_3816	Purines, pyrimidines, nucleosides, and nucleotides: Purine ribonucleotide biosynthesis	adenylosuccinate lyase; purB	0.1314	0.0955	0.08	0.2764	1.1806	-0.0473	0.703	0	0	0	0	-1	0	-1	2	OnlyDuringLaterTimePoints
cce_4221	Purines, pyrimidines, nucleosides, and nucleotides: Purine ribonucleotide biosynthesis	adenylosuccinate synthetase; purA	-0.2806	0.0056	0.4196	-0.7559	0.5121	0.5841	0.3121	0	0	0	1	0	0	0	2	OnlyDuringLaterTimePoints
cce_4354	Purines, pyrimidines, nucleosides, and nucleotides: Purine ribonucleotide biosynthesis	bifunctional purine biosynthesis protein, phosphoribosylaminoimidazolecarboxamide formyltransferase/IMP cyclohydrolase; purH	-0.0601	-0.0014	0.3611	-0.2452	0.7193	-0.0049	0.4512	0	0	0	0	-1	0	0	2	OnlyDuringLaterTimePoints
cce_4750	Purines, pyrimidines, nucleosides, and nucleotides: Purine ribonucleotide biosynthesis	putative N-acetylmannosamine-6-phosphate epimerase	0.0026	0.1542	0.0561	-0.6802	0.0836	-0.0772	0.1342	0	0	0	1	0	0	0	2	OnlyDuringLaterTimePoints
cce_4799	Purines, pyrimidines, nucleosides, and nucleotides: Purine ribonucleotide biosynthesis	rfrA family pentapeptide repeat	0.0459	-0.0068	-0.1414	0.0242	-0.6629	-0.5283	-0.4958	0	0	0	0	1	0	0	2	OnlyDuringLaterTimePoints
cce_0502	Purines, pyrimidines, nucleosides, and nucleotides: Pyrimidine ribonucleotide biosynthesis	bifunctional orotidine-5'-phosphate decarboxylase/orotate phosphoribosyltransferase protein; pyrFE	0.1169	-0.0239	-0.4182	-0.8713	-0.1372	-0.2766	-0.7162	0	0	0	1	0	0	1	2	OnlyDuringLaterTimePoints
cce_1125	Purines, pyrimidines, nucleosides, and nucleotides: Pyrimidine ribonucleotide biosynthesis	dihydroorotate dehydrogenase; pyrD	0.0971	0.0703	0.349	0.6749	0.6867	0.4419	0.6049	0	0	0	-1	-1	0	-1	2	OnlyDuringLaterTimePoints
cce_2923	Purines, pyrimidines, nucleosides, and nucleotides: Pyrimidine ribonucleotide biosynthesis	CTP synthetase; pyrG	0.126	0.102	0.0682	-0.1951	0.5967	0.2601	0.3277	0	0	0	0	-1	0	0	2	OnlyDuringLaterTimePoints
cce_3591	Purines, pyrimidines, nucleosides, and nucleotides: Pyrimidine ribonucleotide biosynthesis	uridylate kinase; pyrH	0.3048	0.5007	0.0522	-0.5209	-0.2129	-0.1814	1.2664	0	0	0	0	0	0	-1	2	OnlyDuringLaterTimePoints
cce_3620	Purines, pyrimidines, nucleosides, and nucleotides: Pyrimidine ribonucleotide biosynthesis	dihydroorotase; pyrC2	0.1451	0.2389	-0.0969	-0.7368	0.3209	-0.269	0.2784	0	0	0	1	0	0	0	2	OnlyDuringLaterTimePoints
cce_0137	Regulatory functions: Regulatory functions	putative sulfotransferase	-0.2068	-0.125	0.1794	0.1753	0.4788	0.4519	0.6136	0	0	0	0	0	0	-1	2	OnlyDuringLaterTimePoints
cce_0220	Regulatory functions: Regulatory functions	two-component sensor histidine kinase	-0.2078	-0.1388	0.0081	0.0554	-1.5271	-0.6558	-1.8361	0	0	0	0	1	1	1	2	OnlyDuringLaterTimePoints
cce_0289	Regulatory functions: Regulatory functions	two-component response regulator	0.0314	0.121	-0.0373	-0.8327	0.8452	0.3386	0.6239	0	0	0	1	-1	0	-1	2	OnlyDuringLaterTimePoints
cce_0316	Regulatory functions: Regulatory functions	probable serin-threonin phosphatase	-0.1678	-0.0844	0.3821	-0.8365	0.3489	-0.0957	0.8822	0	0	0	1	0	0	-1	2	OnlyDuringLaterTimePoints
cce_0657	Regulatory functions: Regulatory functions	two-component response regulator	0.1524	0.0151	-0.3316	-0.6853	0.1743	0.1617	0.0946	0	0	0	1	0	0	0	2	OnlyDuringLaterTimePoints
cce_0678	Regulatory functions: Regulatory functions	two-component response regulator	0.0747	-0.1613	-0.1737	-0.9759	0.3814	-0.3277	0.3012	0	0	0	1	0	0	0	2	OnlyDuringLaterTimePoints
cce_0969	Regulatory functions: Regulatory functions	two-component sensor histidine kinase	-0.0578	-0.0487	-0.046	0.7317	0.0854	-0.4766	0.2145	0	0	0	-1	0	0	0	2	OnlyDuringLaterTimePoints
cce_0970	Regulatory functions: Regulatory functions	two-component transcription regulator	-0.475	-0.2458	-0.3899	0.9656	0.8281	-1.1857	0.674	0	0	0	-1	-1	1	-1	2	OnlyDuringLaterTimePoints
cce_0974	Regulatory functions: Regulatory functions	transcriptional Regulator, TetR family	-0.2639	0.2797	0.3684	-0.6616	-0.5831	-0.288	1.3231	0	0	0	1	0	0	-1	2	OnlyDuringLaterTimePoints
cce_1185	Regulatory functions: Regulatory functions	two-component hybrid sensor and regulator	0.1566	0.0656	-0.035	-0.6192	-0.5328	0.1182	-0.983	0	0	0	1	0	0	1	2	OnlyDuringLaterTimePoints
cce_1186	Regulatory functions: Regulatory functions	two-component hybrid sensor and regulator	-0.1598	-0.0391	-0.1224	-0.6918	-1.0574	-0.8244	-0.8557	0	0	0	1	1	1	1	2	OnlyDuringLaterTimePoints
cce_1250	Regulatory functions: Regulatory functions	putative RNA-binding protein	0.3226	0.1828	0.1232	0.181	-1.1858	-0.3822	-0.9356	0	0	0	0	1	0	1	2	OnlyDuringLaterTimePoints
cce_1328	Regulatory functions: Regulatory functions	GTP-binding protein; hflX	0.1238	0.0342	-0.1806	0.2579	-0.3773	0.2821	-0.6585	0	0	0	0	0	0	1	2	OnlyDuringLaterTimePoints
cce_1379	Regulatory functions: Regulatory functions	transcription regulator; exsB	-0.3285	-0.1857	0.2756	0.052	0.1029	-0.5076	0.6739	0	0	0	0	0	0	-1	2	OnlyDuringLaterTimePoints
cce_1388	Regulatory functions: Regulatory functions	heat-inducible transcriptional repressor; hrcA	-0.2365	0.1093	-0.0863	1.2052	0.1128	0.0152	0.7022	0	0	0	-1	0	0	-1	2	OnlyDuringLaterTimePoints
cce_1457	Regulatory functions: Regulatory functions	unknown; contains an alpha amylase catalytic subdomain	0.1924	0.081	0.0643	-0.3126	-0.6114	0.2388	-0.436	0	0	0	0	1	0	0	2	OnlyDuringLaterTimePoints
cce_1467	Regulatory functions: Regulatory functions	two-component sensor histidine kinase	0.0163	0.04	-0.3296	-0.0437	-0.1843	-0.3341	-0.5877	0	0	0	0	0	0	1	2	OnlyDuringLaterTimePoints
cce_1555	Regulatory functions: Regulatory functions	unknown; contains a GAF domain	-0.0926	0.1566	-0.1502	-0.2023	-0.2953	-0.4125	-0.5938	0	0	0	0	0	0	1	2	OnlyDuringLaterTimePoints
cce_1560	Regulatory functions: Regulatory functions	serine/threonine protein kinase	-0.2142	-0.3921	0.294	-0.1529	-0.4299	-0.7824	-0.3115	0	0	0	0	0	1	0	2	OnlyDuringLaterTimePoints
cce_1631	Regulatory functions: Regulatory functions	probable cell envelope-related transcriptional attenuator precursor	0.0639	-0.448	-0.0328	0.6404	-0.1605	0.1841	-0.1483	0	0	0	-1	0	0	0	2	OnlyDuringLaterTimePoints
cce_1673	Regulatory functions: Regulatory functions	serine/threonine protein kinase	-0.1394	0.0357	0.0239	-0.3486	-0.5856	-0.2798	-0.0119	0	0	0	0	1	0	0	2	OnlyDuringLaterTimePoints
cce_1725	Regulatory functions: Regulatory functions	two-component transcriptional regulatory protein	0.0984	-0.1163	-0.0905	-0.6081	0.3061	-0.0352	0.0952	0	0	0	1	0	0	0	2	OnlyDuringLaterTimePoints
cce_1751	Regulatory functions: Regulatory functions	adaptive-response sensory histidine kinase; sasA	-0.0785	-0.1843	-0.0396	-0.7442	-0.1631	-0.5455	-0.1465	0	0	0	1	0	0	0	2	OnlyDuringLaterTimePoints
cce_1787	Regulatory functions: Regulatory functions	conserved hypothetical protein	0.0083	0.0609	0.2176	0.9591	2.3458	0.063	0.4623	0	0	0	-1	-1	0	0	2	OnlyDuringLaterTimePoints
cce_1808	Regulatory functions: Regulatory functions	probable two-component system response regulator, OmpR subfamily	-0.0959	-0.0136	-0.4687	0.4797	0.5953	-0.4795	-1.3	0	0	0	0	-1	0	1	2	OnlyDuringLaterTimePoints
cce_1848	Regulatory functions: Regulatory functions	probable two-component sensor histidine kinase	0.0167	0.2745	-0.5626	-1.2786	-1.0895	-0.4711	-2.6311	0	0	0	1	1	0	1	2	OnlyDuringLaterTimePoints
cce_1898	Regulatory functions: Regulatory functions	probable transcriptional regulator; patB	-0.4749	-0.2421	-0.1215	0.6168	0.3848	-1.0998	0.1838	0	0	0	-1	0	0	0	2	OnlyDuringLaterTimePoints
cce_1899	Regulatory functions: Regulatory functions	SOS function regulatory protein; lexA	-0.2092	-0.0752	0.2486	-0.4943	0.671	-0.2151	0.4617	0	0	0	0	-1	0	0	2	OnlyDuringLaterTimePoints
cce_1934	Regulatory functions: Regulatory functions	putative adenylate/guanylate cyclase	0.2887	0.0571	-0.3291	-0.2608	-0.195	0.1261	-0.8475	0	0	0	0	0	0	1	2	OnlyDuringLaterTimePoints
cce_1961	Regulatory functions: Regulatory functions	GTP-binding protein	0.0552	-0.0509	0.4335	0.3896	-0.1477	-0.0313	-0.5981	0	0	0	0	0	0	1	2	OnlyDuringLaterTimePoints
cce_1982	Regulatory functions: Regulatory functions	CheY-like two-component hybrid sensor and regulator	0.0345	0.055	0.2721	-0.1918	-0.6147	-0.0606	-1.1026	0	0	0	0	1	0	1	2	OnlyDuringLaterTimePoints
cce_2050	Regulatory functions: Regulatory functions	two-component system, regulatory protein	0.0266	-0.1233	-0.0898	-0.2998	-0.4593	0.214	-0.7264	0	0	0	0	0	0	1	2	OnlyDuringLaterTimePoints
cce_2116	Regulatory functions: Regulatory functions	serine/threonine protein kinase	0.0175	-0.1238	-0.4059	-0.3371	-0.8701	-0.0572	-1.404	0	0	0	0	1	0	1	2	OnlyDuringLaterTimePoints
cce_2174	Regulatory functions: Regulatory functions	WD-40 repeat-containing serine/threonine protein kinase	0.1675	0.0592	-0.1598	-0.1634	-0.9682	-0.0319	-0.3537	0	0	0	0	1	0	0	2	OnlyDuringLaterTimePoints
cce_2505	Regulatory functions: Regulatory functions	two-component hybrid sensor and regulator	0.303	-0.0672	-0.1577	0.3736	-1.238	-0.6797	-1.6211	0	0	0	0	1	1	1	2	OnlyDuringLaterTimePoints
cce_2509	Regulatory functions: Regulatory functions	two-component hybrid sensor and regulator	0.0001	-0.052	-0.124	0.028	-0.4468	-0.4471	-0.68	0	0	0	0	0	0	1	2	OnlyDuringLaterTimePoints
cce_2735	Regulatory functions: Regulatory functions	ATPase	0.0171	-0.0853	0.1795	-0.0412	-0.7752	-0.3596	-0.0867	0	0	0	0	1	0	0	2	OnlyDuringLaterTimePoints
cce_2943	Regulatory functions: Regulatory functions	serine/threonine protein kinase	0.403	0.1244	-0.3324	0.2784	-0.6458	-0.1701	-0.4574	0	0	0	0	1	0	0	2	OnlyDuringLaterTimePoints
cce_3320	Regulatory functions: Regulatory functions	two-component response regulator	0.1	0.0518	0.3062	0.4524	-0.6196	-0.0642	-0.1959	0	0	0	0	1	0	0	2	OnlyDuringLaterTimePoints
cce_3468	Regulatory functions: Regulatory functions	transcriptional regulator, ArsR family	0.087	-0.1289	-0.5345	-0.9019	-0.6333	-0.3374	-0.762	0	0	0	1	1	0	1	2	OnlyDuringLaterTimePoints
cce_3923	Regulatory functions: Regulatory functions	hypothetical protein; contains glycoside hydrolase, family 19 and peptidase M15A domains	0.2048	-0.1523	-0.4681	-0.4487	-0.4511	0.0442	-0.9645	0	0	0	0	0	0	1	2	OnlyDuringLaterTimePoints
cce_3938	Regulatory functions: Regulatory functions	two-component response regulator	0.1243	-0.0142	-0.1426	-0.4087	-0.2636	-0.1031	-0.6636	0	0	0	0	0	0	1	2	OnlyDuringLaterTimePoints
cce_3960	Regulatory functions: Regulatory functions	two-component response regulator	0.0837	0.122	-0.0187	-0.7254	0.2312	0.0641	0.3588	0	0	0	1	0	0	0	2	OnlyDuringLaterTimePoints
cce_4002	Regulatory functions: Regulatory functions	two-component response regulator; rpaB	0.0393	0.1204	0.17	-0.7068	0.9547	-0.3694	0.8207	0	0	0	1	-1	0	-1	2	OnlyDuringLaterTimePoints
cce_4183	Regulatory functions: Regulatory functions	two-component response regulator	0.008	-0.3872	0.0334	-0.7514	1.0007	0.103	0.6294	0	0	0	1	-1	0	-1	2	OnlyDuringLaterTimePoints
cce_4416	Regulatory functions: Regulatory functions	two-component response regulator	0.2309	0.1322	-0.2275	-1.2959	-0.3447	-0.5142	0.0543	0	0	0	1	0	0	0	2	OnlyDuringLaterTimePoints
cce_4751	Regulatory functions: Regulatory functions	two-component hybrid sensor and regulator	0.0503	0.1798	-0.1422	-0.3508	0.6283	-0.1653	-0.2197	0	0	0	0	-1	0	0	2	OnlyDuringLaterTimePoints
cce_4934	Regulatory functions: Regulatory functions	hypothetical protein	0.082	-0.1671	-0.0242	-0.307	-1.2593	-0.595	-0.5722	0	0	0	0	1	1	0	2	OnlyDuringLaterTimePoints
cce_3346	Transcription: Degradation of RNA	ribonuclease II; rnb	-0.2433	0.1743	0.466	-0.0013	0.4872	0.642	0.4326	0	0	0	0	0	-1	0	2	OnlyDuringLaterTimePoints
cce_4524	Transcription: Degradation of RNA	ribonuclease PH; rph	-0.0474	0.1692	0.1823	-0.1505	0.2862	0.2876	0.585	0	0	0	0	0	0	-1	2	OnlyDuringLaterTimePoints
cce_0601	Transcription: RNA synthesis, modification, and DNA transcription	group 2 sigma-70 RNA polymerase sigma factor E; sigE	0.214	0.4454	0.5069	2.1006	-1.1412	-0.6913	-0.4937	0	0	0	-1	1	1	0	2	OnlyDuringLaterTimePoints
cce_0623	Transcription: RNA synthesis, modification, and DNA transcription	polyribonucleotide nucleotidyltransferase; pnp	0.4733	0.1405	-0.4548	-0.3836	0.8769	0.7257	0.0169	0	0	0	0	-1	-1	0	2	OnlyDuringLaterTimePoints
cce_0644	Transcription: RNA synthesis, modification, and DNA transcription	group 2 sigma-70 RNA polymerase sigma factor B; sigB	-0.1237	-0.3168	-0.1736	0.4982	-1.2684	0.5378	-1.0739	0	0	0	0	1	0	1	2	OnlyDuringLaterTimePoints
cce_0875	Transcription: RNA synthesis, modification, and DNA transcription	group 1 sigma-70 RNA polymerase sigma factor A; sigA	0.3687	0.3711	-0.1795	1.4196	0.8212	0.8681	-0.3296	0	0	0	-1	-1	-1	0	2	OnlyDuringLaterTimePoints
cce_1366	Transcription: RNA synthesis, modification, and DNA transcription	protein subunit of ribonuclease P; rnpA	-0.1019	0.2024	0.5196	-0.2762	0.9626	0.7766	0.6041	0	0	0	0	-1	-1	-1	2	OnlyDuringLaterTimePoints
cce_1841	Transcription: RNA synthesis, modification, and DNA transcription	transcription termination factor, N utilization substance protein; nusA	0.0105	0.3405	0.1538	0.4674	0.7165	0.4548	0.3094	0	0	0	0	-1	0	0	2	OnlyDuringLaterTimePoints
cce_2337	Transcription: RNA synthesis, modification, and DNA transcription	group 2 sigma-70 RNA polymerase sigma factor	0.1655	0.0921	-0.2981	0.2797	0.045	-0.1284	-0.8238	0	0	0	0	0	0	1	2	OnlyDuringLaterTimePoints
cce_2496	Transcription: RNA synthesis, modification, and DNA transcription	probable metallothionein; smtA	-0.0835	0.1484	0.445	-0.3389	-0.5146	-0.2703	-0.7239	0	0	0	0	0	0	1	2	OnlyDuringLaterTimePoints
cce_3838	Transcription: RNA synthesis, modification, and DNA transcription	RNA polymerase gamma-subunit; rpoC1	0.1792	0.3266	-0.2734	0.0873	-0.0904	0.2798	-1.535	0	0	0	0	0	0	1	2	OnlyDuringLaterTimePoints
cce_4039	Transcription: RNA synthesis, modification, and DNA transcription	RNA polymerase alpha subunit; rpoA	0.0987	-0.0997	0.4505	-0.309	0.9504	0.6683	-0.4954	0	0	0	0	-1	0	0	2	OnlyDuringLaterTimePoints
cce_4142	Transcription: RNA synthesis, modification, and DNA transcription	group 4 sigma-70 RNA polymerase sigma factor G; sigG	-0.261	-0.0138	-0.2631	1.1109	-0.9708	0.9613	0.6862	0	0	0	-1	1	-1	-1	2	OnlyDuringLaterTimePoints
cce_4436	Transcription: RNA synthesis, modification, and DNA transcription	ATP-dependent RNA helicase; deaD	0.1769	0.1352	-0.0893	0.7142	1.2295	0.8211	0.3191	0	0	0	0	-1	-1	0	2	OnlyDuringLaterTimePoints
cce_0083	Translation: Aminoacyl tRNA synthetases and tRNA modification	leucyl/phenylalanyl-tRNA--protein transferase; aat	0.1366	-0.0148	0.07	-0.8746	0.7072	0.2468	0.1855	0	0	0	1	-1	0	0	2	OnlyDuringLaterTimePoints
cce_0284	Translation: Aminoacyl tRNA synthetases and tRNA modification	glutamyl-tRNA (Gln) amidotransferase subunit C; gatC	0.0958	0.2629	0.2104	0.0854	0.0597	0.7383	0.1769	0	0	0	0	0	-1	0	2	OnlyDuringLaterTimePoints
cce_1318	Translation: Aminoacyl tRNA synthetases and tRNA modification	phenylalanyl-tRNA synthetase alpha chain; pheS	-0.2003	0.0543	0.4558	-0.8904	0.7314	0.3111	1.0302	0	0	0	1	-1	0	-1	2	OnlyDuringLaterTimePoints
cce_1321	Translation: Aminoacyl tRNA synthetases and tRNA modification	phenylalanyl-tRNA synthetase beta subunit; pheT	-0.2395	-0.2758	-0.2595	-0.5524	-0.422	-0.7734	0.2785	0	0	0	0	0	1	0	2	OnlyDuringLaterTimePoints
cce_1674	Translation: Aminoacyl tRNA synthetases and tRNA modification	glutamyl-tRNA (Gln) amidotransferase subunit B; gatB	0.0481	-0.0449	-0.1996	0.8873	0.6571	0.5584	-0.0497	0	0	0	-1	-1	0	0	2	OnlyDuringLaterTimePoints
cce_1710	Translation: Aminoacyl tRNA synthetases and tRNA modification	glutamyl-tRNA (Gln) amidotransferase subunit A; gatA	0.3283	0.1194	-0.3779	-0.9165	0.7544	0.2021	0.5803	0	0	0	1	-1	0	0	2	OnlyDuringLaterTimePoints
cce_1754	Translation: Aminoacyl tRNA synthetases and tRNA modification	peptidyl-tRNA hydrolase; pth	-0.0702	-0.0133	0.0868	-0.7152	-0.8855	-0.582	-0.1852	0	0	0	1	1	0	0	2	OnlyDuringLaterTimePoints
cce_1758	Translation: Aminoacyl tRNA synthetases and tRNA modification	glutamyl-tRNA synthetase; gltX	-0.0385	0.1366	0.3879	-0.754	0.6948	0.5607	0.9862	0	0	0	1	-1	0	-1	2	OnlyDuringLaterTimePoints
cce_1799	Translation: Aminoacyl tRNA synthetases and tRNA modification	RNA methyltransferase TrmH, group 3; trmH	0.2612	0.2062	0.0436	0.2858	0.509	0.8604	-0.3412	0	0	0	0	0	-1	0	2	OnlyDuringLaterTimePoints
cce_1946	Translation: Aminoacyl tRNA synthetases and tRNA modification	methionyl-tRNA synthetase; metS	-0.011	0.4521	0.382	0.7392	0.2473	0.1392	-0.6661	0	0	0	-1	0	0	1	2	OnlyDuringLaterTimePoints
cce_2992	Translation: Aminoacyl tRNA synthetases and tRNA modification	glycyl-tRNA synthetase beta chain; glyS	-0.1332	0.0473	0.4634	0.0741	0.5644	0.1035	0.8851	0	0	0	0	0	0	-1	2	OnlyDuringLaterTimePoints
cce_3462	Translation: Aminoacyl tRNA synthetases and tRNA modification	lysyl-tRNA synthetase; lysS	0.0217	0.0836	0.2109	0.6708	0.1538	0.6	0.0553	0	0	0	-1	0	-1	0	2	OnlyDuringLaterTimePoints
cce_3534	Translation: Aminoacyl tRNA synthetases and tRNA modification	tryptophanyl-tRNA synthetase; trpS	-0.0658	0.189	-0.0141	-0.552	0.4147	-0.3217	0.7627	0	0	0	0	0	0	-1	2	OnlyDuringLaterTimePoints
cce_3546	Translation: Aminoacyl tRNA synthetases and tRNA modification	amidase	-0.0345	-0.4472	-0.0087	0.8929	-0.1092	0.1364	0.2406	0	0	0	-1	0	0	0	2	OnlyDuringLaterTimePoints
cce_3976	Translation: Aminoacyl tRNA synthetases and tRNA modification	transfer RNA-Gln reductase; hemA	0.2428	0.3065	-0.0437	-0.2619	0.1753	-0.3586	0.6553	0	0	0	0	0	0	-1	2	OnlyDuringLaterTimePoints
cce_3990	Translation: Aminoacyl tRNA synthetases and tRNA modification	glycyl-tRNA synthetase alpha chain; glyQ	0.1435	0.1652	0.5835	0.6066	0.937	0.8019	0.5303	0	0	0	-1	-1	-1	0	2	OnlyDuringLaterTimePoints
cce_4041	Translation: Aminoacyl tRNA synthetases and tRNA modification	tRNA pseudouridine synthase; truA	0.0627	-0.0973	0.1466	-0.3367	0.4012	0.5552	-0.9418	0	0	0	0	0	0	1	2	OnlyDuringLaterTimePoints
cce_4152	Translation: Aminoacyl tRNA synthetases and tRNA modification	aspartyl-tRNA synthetase; aspS	0.0713	0.3207	0.4918	0.4837	0.2384	-0.2653	0.6968	0	0	0	0	0	0	-1	2	OnlyDuringLaterTimePoints
cce_4460	Translation: Aminoacyl tRNA synthetases and tRNA modification	prolyl-tRNA synthetase; proS	-0.2511	0.2088	0.3199	-0.5027	0.174	-0.1992	1.0977	0	0	0	0	0	0	-1	2	OnlyDuringLaterTimePoints
cce_4545	Translation: Aminoacyl tRNA synthetases and tRNA modification	isoleucyl-tRNA synthetase; ileS	-0.1708	0.1179	0.1569	0.9953	0.7457	0.2921	0.6838	0	0	0	-1	-1	0	-1	2	OnlyDuringLaterTimePoints
cce_0080	Translation: Degradation of proteins, peptides, and glycopeptides	carboxyl-terminal protease; ctpB	-0.1417	-0.3497	-0.308	0.7295	0.0178	0.7331	0.2333	0	0	0	-1	0	-1	0	2	OnlyDuringLaterTimePoints
cce_0370	Translation: Degradation of proteins, peptides, and glycopeptides	protease	0.0075	-0.0366	-0.2344	-0.6435	-0.0004	0.0609	-0.4534	0	0	0	1	0	0	0	2	OnlyDuringLaterTimePoints
cce_0593	Translation: Degradation of proteins, peptides, and glycopeptides	protease	0.0806	0.1477	-0.1308	-1.058	-2.3391	-0.7207	-2.068	0	0	0	1	1	1	1	2	OnlyDuringLaterTimePoints
cce_1001	Translation: Degradation of proteins, peptides, and glycopeptides	ATP-dependent Clp protease, regulatory subunit; clpC2	-0.339	-0.1703	-0.3724	-0.0335	0.591	0.5537	0.1691	0	0	0	0	-1	0	0	2	OnlyDuringLaterTimePoints
cce_1117	Translation: Degradation of proteins, peptides, and glycopeptides	probable proteinase inhibitor I4, serpin	0.0279	0.0362	0.3472	0.7191	0.1652	-0.3167	0.196	0	0	0	-1	0	0	0	2	OnlyDuringLaterTimePoints
cce_1910	Translation: Degradation of proteins, peptides, and glycopeptides	ATP-dependent Clp protease, proteolytic subunit; clpP4	-0.1191	-0.0181	0.1086	1.2008	0.4913	0.5995	0.8866	0	0	0	-1	0	-1	0	2	OnlyDuringLaterTimePoints
cce_1911	Translation: Degradation of proteins, peptides, and glycopeptides	ATP-dependent Clp protease, proteolytic subunit; clpP3	0.1866	0.1943	-0.0775	0.7441	0.5264	0.7076	0.0967	0	0	0	-1	0	-1	0	2	OnlyDuringLaterTimePoints
cce_2291	Translation: Degradation of proteins, peptides, and glycopeptides	processing protease; ymxG	0.1597	0.2403	0.0237	0.4753	0.2115	0.6828	-0.0615	0	0	0	0	0	-1	0	2	OnlyDuringLaterTimePoints
cce_2904	Translation: Degradation of proteins, peptides, and glycopeptides	peptidase, M16B family	-0.2344	-0.3009	-0.3239	-0.8109	-0.414	0.1314	-1.1345	0	0	0	1	0	0	0	2	OnlyDuringLaterTimePoints
cce_2905	Translation: Degradation of proteins, peptides, and glycopeptides	peptidase, M16B family	0.0386	-0.0597	-0.1839	-0.3004	-0.3121	0.326	-0.7415	0	0	0	0	0	0	1	2	OnlyDuringLaterTimePoints
cce_2982	Translation: Degradation of proteins, peptides, and glycopeptides	protease	0.2314	0.0442	-0.128	0.2065	-0.2527	-0.2015	-1.0286	0	0	0	0	0	0	1	2	OnlyDuringLaterTimePoints
cce_3768	Translation: Degradation of proteins, peptides, and glycopeptides	oligopeptidase A	-0.2013	-0.0078	0.3029	0.9869	0.2658	0.3454	-0.3111	0	0	0	-1	0	0	0	2	OnlyDuringLaterTimePoints
cce_4247	Translation: Degradation of proteins, peptides, and glycopeptides	ATP-dependent Clp protease, regulatory subunit; clpC1	0.1329	0.129	-0.3406	0.2655	0.493	0.9463	-0.4533	0	0	0	0	0	-1	0	2	OnlyDuringLaterTimePoints
cce_4438	Translation: Degradation of proteins, peptides, and glycopeptides	ATP-dependent Clp protease, ATPase subunit; clpX	0.1728	0.0956	0.0122	-0.0902	-0.0861	0.1299	-1.1807	0	0	0	0	0	0	1	2	OnlyDuringLaterTimePoints
cce_4586	Translation: Degradation of proteins, peptides, and glycopeptides	DegT/DnrJ/EryC1/StrS aminotransferase family protein	-0.0557	0.2121	-0.0296	-0.2934	0.1791	-0.223	0.619	0	0	0	0	0	0	-1	2	OnlyDuringLaterTimePoints
cce_5280	Translation: Degradation of proteins, peptides, and glycopeptides	hypothetical protein; contains a Na-Ca exchanger/integrin-beta4 domain	0.1356	0.1697	-0.2482	-0.2466	-0.7987	-0.6613	-0.497	0	0	0	0	1	1	0	2	OnlyDuringLaterTimePoints
cce_0102	Translation: Nucleoproteins	RNA-binding protein	0.1708	0.0918	0.25	0.3122	1.4851	0.769	1.4439	0	0	0	0	-1	-1	-1	2	OnlyDuringLaterTimePoints
cce_0146	Translation: Nucleoproteins	RNA-binding protein	0.2223	0.115	0.3544	-0.4134	0.3806	0.8664	0.03	0	0	0	0	0	-1	0	2	OnlyDuringLaterTimePoints
cce_1277	Translation: Nucleoproteins	putative histone-like DNA-binding protein	-0.0267	0.0962	0.2809	-0.5858	-0.3702	-0.4511	0.9236	0	0	0	0	0	0	-1	2	OnlyDuringLaterTimePoints
cce_1942	Translation: Nucleoproteins	RNA-binding protein	0.4435	0.1308	-0.3161	-0.0611	-1.3013	0.123	-1.3362	0	0	0	0	1	0	1	2	OnlyDuringLaterTimePoints
cce_3336	Translation: Nucleoproteins	RNA-binding protein	0.2419	-0.0389	0.0196	-0.4356	0.4136	0.7676	-0.0893	0	0	0	0	0	-1	0	2	OnlyDuringLaterTimePoints
cce_5153	Translation: Nucleoproteins	probable chromosome partitioning protein, ParA family	0.0193	-0.2624	-0.0856	-1.9276	-0.3384	-0.9879	0.4649	0	0	0	1	0	1	0	2	OnlyDuringLaterTimePoints
cce_0505	Translation: Protein modification and translation factors	peptidyl-prolyl cis-trans isomerase	-0.1289	-0.0258	-0.3085	-0.9918	1.4226	0.0595	1.8162	0	0	0	1	-1	0	-1	2	OnlyDuringLaterTimePoints
cce_0704	Translation: Protein modification and translation factors	elongation factor TS; tsf	0.1791	-0.0535	-0.041	-0.5383	0.8694	0.7445	1.0321	0	0	0	0	-1	-1	-1	2	OnlyDuringLaterTimePoints
cce_0708	Translation: Protein modification and translation factors	leucine aminopeptidase	0.097	0.2392	0.0106	-1.2073	0.9326	-0.1554	0.3518	0	0	0	1	-1	0	0	2	OnlyDuringLaterTimePoints
cce_1418	Translation: Protein modification and translation factors	probable AMP-dependent synthetase and ligase	0.0183	0.0393	-0.0734	1.2239	0.1613	0.5243	0.2375	0	0	0	-1	0	0	0	2	OnlyDuringLaterTimePoints
cce_1679	Translation: Protein modification and translation factors	GTP-binding protein TypA	-0.0115	0.1463	0.0337	0.9049	1.14	0.7453	0.497	0	0	0	-1	-1	0	0	2	OnlyDuringLaterTimePoints
cce_1839	Translation: Protein modification and translation factors	translation initiation factor IF-2; infB	0.1273	0.1807	0.0822	1.2568	0.0765	0.1476	-1.5246	0	0	0	-1	0	0	1	2	OnlyDuringLaterTimePoints
cce_2051	Translation: Protein modification and translation factors	elongation factor EF-G; fus2	0.1474	0.2646	0.2064	0.3829	0.6477	0.8282	-0.42	0	0	0	0	0	-1	0	2	OnlyDuringLaterTimePoints
cce_2122	Translation: Protein modification and translation factors	elongation factor P; efp	-0.1044	0.1614	-0.1848	-0.6452	0.7465	-0.0341	0.6898	0	0	0	1	-1	0	-1	2	OnlyDuringLaterTimePoints
cce_2171	Translation: Protein modification and translation factors	peptidyl-prolyl cis-trans isomerase B; ppiB	0.1656	0.2014	0.0278	-0.8216	0.4572	0.4225	0.4834	0	0	0	1	0	0	0	2	OnlyDuringLaterTimePoints
cce_2333	Translation: Protein modification and translation factors	probable translation initiation factor, aIF-2BI	-0.0551	-0.0353	-0.0444	-0.7701	0.0861	-0.1954	-0.0857	0	0	0	1	0	0	0	2	OnlyDuringLaterTimePoints
cce_2430	Translation: Protein modification and translation factors	peptide methionine sulfoxide reductase; msrA2	-0.0151	0.119	0.0508	0.1579	1.3672	-0.2623	0.1517	0	0	0	0	-1	0	0	2	OnlyDuringLaterTimePoints
cce_2646	Translation: Protein modification and translation factors	putative S6 modification enzyme; rimK	0.0248	0.1127	-0.0746	-0.5678	0.8052	0.0491	0.2569	0	0	0	0	-1	0	0	2	OnlyDuringLaterTimePoints
cce_3104	Translation: Protein modification and translation factors	elongation factor EF-G fragment	0.207	0.5439	-0.0467	-1.5872	-2.3933	-1.3764	-1.8167	0	0	0	1	1	1	1	2	OnlyDuringLaterTimePoints
cce_3107	Translation: Protein modification and translation factors	elongation factor EF-G fragment	0.1934	-0.1404	-0.0875	-0.9345	-2.5766	-0.7354	-1.9676	0	0	0	1	1	1	1	2	OnlyDuringLaterTimePoints
cce_3376	Translation: Protein modification and translation factors	ribosomal-protein-alanine acetyltransferase; rimI	-0.0068	-0.1504	-0.022	0.1909	-0.5987	0.1874	-0.0894	0	0	0	0	1	0	0	2	OnlyDuringLaterTimePoints
cce_4035	Translation: Protein modification and translation factors	translation initiation factor IF-1; infA	-0.0898	-0.1415	0.5437	-0.2497	0.5933	0.4212	0.4795	0	0	0	0	-1	0	0	2	OnlyDuringLaterTimePoints
cce_4088	Translation: Protein modification and translation factors	elongation factor EF-Tu; tufA	-0.1037	0.0667	-0.062	-0.2875	1.1317	0.8749	0.7569	0	0	0	0	-1	-1	-1	2	OnlyDuringLaterTimePoints
cce_4089	Translation: Protein modification and translation factors	elongation factor EF-G; fus1	0.0292	0.0508	-0.3158	-0.1274	0.8991	0.5671	0.1177	0	0	0	0	-1	0	0	2	OnlyDuringLaterTimePoints
cce_4674	Translation: Protein modification and translation factors	ribosome-binding factor A; rbfA	0.3018	0.3902	-0.2924	-0.4844	-1.7402	0.2153	-0.5068	0	0	0	0	1	0	0	2	OnlyDuringLaterTimePoints
cce_0081	Translation: Ribosomal proteins	30S ribosomal protein S14; rps14	-0.1397	0.0486	0.1412	-0.0509	0.6002	0.6218	0.5954	0	0	0	0	-1	-1	-1	2	OnlyDuringLaterTimePoints
cce_0136	Translation: Ribosomal proteins	50S ribosomal protein L28; rpl28	0.0068	0.0566	0.0587	-0.2883	0.6569	0.3128	0.9104	0	0	0	0	-1	0	-1	2	OnlyDuringLaterTimePoints
cce_0217	Translation: Ribosomal proteins	30S ribosomal protein S4; rps4	-0.1159	-0.0107	0.1462	-0.7348	0.1467	0.199	-0.3999	0	0	0	1	0	0	0	2	OnlyDuringLaterTimePoints
cce_0219	Translation: Ribosomal proteins	30S ribosomal protein S1; rps1-1	0.1054	0.2751	0.2029	0.2034	1.0518	1.0393	0.2068	0	0	0	0	-1	-1	0	2	OnlyDuringLaterTimePoints
cce_0223	Translation: Ribosomal proteins	50S ribosomal protein L7/L12; rpl7/rpl12	-0.2102	-0.3547	0.3305	-0.7833	1.0417	0.7414	1.0602	0	0	0	1	-1	-1	-1	2	OnlyDuringLaterTimePoints
cce_0224	Translation: Ribosomal proteins	50S ribosomal protein L10; rpl10	-0.4591	-0.3705	0.4505	-0.7134	1.8982	1.3724	2.0474	0	0	0	1	-1	-1	-1	2	OnlyDuringLaterTimePoints
cce_0225	Translation: Ribosomal proteins	50S ribosomal protein L1; rpl1	-0.118	-0.1037	0.5283	-0.4891	1.2096	1.1339	1.5044	0	0	0	0	-1	-1	-1	2	OnlyDuringLaterTimePoints
cce_0226	Translation: Ribosomal proteins	50S ribosomal protein L11; rpl11	0.0251	0.0336	-0.3436	-0.1111	1.5117	0.6104	0.8181	0	0	0	0	-1	-1	-1	2	OnlyDuringLaterTimePoints
cce_0290	Translation: Ribosomal proteins	30S ribosomal protein S21; rps21-2	-0.0624	-0.1169	0.2277	-1.0873	-0.3277	0.6246	-0.5072	0	0	0	1	0	-1	0	2	OnlyDuringLaterTimePoints
cce_0705	Translation: Ribosomal proteins	30S ribosomal protein S2; rps2	0.1181	-0.2615	0.1006	-0.6275	0.8014	0.4338	0.6443	0	0	0	1	-1	0	-1	2	OnlyDuringLaterTimePoints
cce_1392	Translation: Ribosomal proteins	50S ribosomal protein L27; rpl27	-0.0483	-0.0007	0.0508	-0.2981	0.065	0.7146	-0.165	0	0	0	0	0	-1	0	2	OnlyDuringLaterTimePoints
cce_1653	Translation: Ribosomal proteins	30S ribosomal protein S1; rps1-2	-0.027	0.2385	0.193	0.4625	1.3465	0.9177	1.1621	0	0	0	0	-1	-1	-1	2	OnlyDuringLaterTimePoints
cce_2133	Translation: Ribosomal proteins	ribosomal protein L11 methyltransferase; prmA	0.0948	0.1259	0.0133	0.1859	0.8238	0.2457	0.3931	0	0	0	0	-1	0	0	2	OnlyDuringLaterTimePoints
cce_2725	Translation: Ribosomal proteins	30s ribosomal protein S6; rps6	-0.0791	-0.2797	0.239	-1.1064	0.5868	0.2806	1.0099	0	0	0	1	-1	0	-1	2	OnlyDuringLaterTimePoints
cce_3103	Translation: Ribosomal proteins	30S ribosomal protein S21; rps21-1	0.4419	0.4269	0.4328	0.0117	1.1857	0.6322	0.1392	0	0	0	0	-1	-1	0	2	OnlyDuringLaterTimePoints
cce_3150	Translation: Ribosomal proteins	50S ribosomal protein L20; rpl20	-0.287	0.1258	0.5381	-0.1431	0.4595	1.18	0.9662	0	0	0	0	0	-1	-1	2	OnlyDuringLaterTimePoints
cce_3347	Translation: Ribosomal proteins	30S ribosomal protein S18; rps18	-0.3999	0.1654	0.5007	0.0419	1.163	1.0741	1.0881	0	0	0	0	-1	-1	-1	2	OnlyDuringLaterTimePoints
cce_3348	Translation: Ribosomal proteins	50S ribosomal protein L33; rpl33	-0.4425	0.153	0.5024	0.0378	1.1662	1.0761	1.1363	0	0	0	0	-1	-1	-1	2	OnlyDuringLaterTimePoints
cce_3392	Translation: Ribosomal proteins	30S ribosomal protein S16; rps16	-0.1426	0.0007	-0.2968	-0.8962	0.8886	0.2631	-0.0929	0	0	0	1	-1	0	0	2	OnlyDuringLaterTimePoints
cce_4021	Translation: Ribosomal proteins	50S ribosomal protein L16; rpl16	-0.5266	-0.06	0.5683	-0.1939	1.6683	1.2064	0.8589	0	0	0	0	-1	-1	-1	2	OnlyDuringLaterTimePoints
cce_4022	Translation: Ribosomal proteins	50S ribosomal protein L29; rpl29	-0.5116	0.02	0.653	-0.0891	1.5429	1.1187	0.7307	0	0	0	0	-1	-1	-1	2	OnlyDuringLaterTimePoints
cce_4023	Translation: Ribosomal proteins	30S ribosomal protein S17; rps17	-0.4789	0.0633	0.6915	-0.032	1.4883	1.0954	0.6334	0	0	0	0	-1	-1	-1	2	OnlyDuringLaterTimePoints
cce_4024	Translation: Ribosomal proteins	50S ribosomal protein L14; rpl14	-0.3881	0.0608	0.6642	0.2152	1.6718	1.2768	0.5125	0	0	0	0	-1	-1	0	2	OnlyDuringLaterTimePoints
cce_4025	Translation: Ribosomal proteins	50S ribosomal protein L24; rpl24	-0.3076	0.0364	0.7315	0.2707	1.5183	1.2637	0.3936	0	0	0	0	-1	-1	0	2	OnlyDuringLaterTimePoints
cce_4031	Translation: Ribosomal proteins	30S ribosomal protein S5; rps5	-0.1708	-0.0753	0.5815	-0.5547	1.7944	1.0534	0.7113	0	0	0	0	-1	-1	-1	2	OnlyDuringLaterTimePoints
cce_4037	Translation: Ribosomal proteins	30S ribosomal protein S13; rps13	0.073	-0.0578	0.2898	-0.2457	1.1838	0.6589	-0.3045	0	0	0	0	-1	-1	0	2	OnlyDuringLaterTimePoints
cce_4038	Translation: Ribosomal proteins	30S ribosomal protein S11; rps11	0.0728	-0.0835	0.3822	-0.2448	1.1987	0.699	-0.4325	0	0	0	0	-1	-1	0	2	OnlyDuringLaterTimePoints
cce_4040	Translation: Ribosomal proteins	50S ribosomal protein L17; rpl17	0.145	-0.044	0.3348	-0.3377	0.5239	0.6893	-0.9449	0	0	0	0	0	-1	1	2	OnlyDuringLaterTimePoints
cce_4043	Translation: Ribosomal proteins	30S ribosomal protein S9; rps9	0.1298	-0.0139	0.1176	0.1228	0.1259	0.413	-0.7462	0	0	0	0	0	0	1	2	OnlyDuringLaterTimePoints
cce_4044	Translation: Ribosomal proteins	50S ribosomal protein L31; rpl31	0.1612	-0.0594	-0.0547	-0.1269	0.2277	0.4269	-0.8953	0	0	0	0	0	0	1	2	OnlyDuringLaterTimePoints
cce_4087	Translation: Ribosomal proteins	30S ribosomal protein S10; rps10	-0.1714	0.0403	-0.0659	-0.0687	1.6036	0.3278	1.5485	0	0	0	0	-1	0	-1	2	OnlyDuringLaterTimePoints
cce_4091	Translation: Ribosomal proteins	30S ribosomal protein S12; rps12	-0.1189	0.2286	0.1316	0.2452	0.6397	0.6612	0.3122	0	0	0	0	-1	-1	0	2	OnlyDuringLaterTimePoints
cce_4398	Translation: Ribosomal proteins	50S ribosomal protein L9; rpl9	-0.3439	-0.0212	0.1116	-0.3578	0.8183	0.2185	0.8154	0	0	0	0	-1	0	-1	2	OnlyDuringLaterTimePoints
cce_5286	Translation: Ribosomal proteins	50S ribosomal protein L7/L12-like protein	-0.0603	-0.3059	-0.2155	0.2078	0.5589	-0.6138	0.1043	0	0	0	0	0	1	0	2	OnlyDuringLaterTimePoints
cce_4580	Transport and binding proteins: Other	conserved hypothetical protein	-0.0171	0.3339	0.4817	1.1963	-0.296	0.2825	1.1059	0	0	0	-1	0	0	-1	2	OnlyDuringLaterTimePoints
cce_0032	Transport and binding proteins: Transport and binding proteins	ferrous iron transport protein B; feoB1	0.0754	0.0197	0.1835	1.484	0.2771	0.3883	-1.2466	0	0	0	-1	0	0	1	2	OnlyDuringLaterTimePoints
cce_0124	Transport and binding proteins: Transport and binding proteins	putative ABC transporter, oligopeptides	0.0297	0.3575	0.2377	-0.2293	0.4737	0.1207	0.636	0	0	0	0	0	0	-1	2	OnlyDuringLaterTimePoints
cce_0148	Transport and binding proteins: Transport and binding proteins	cation-transporting P-type ATPase, E1-E2 type	-0.0227	-0.1236	0.1843	0.073	-0.724	-0.2624	-0.1645	0	0	0	0	1	0	0	2	OnlyDuringLaterTimePoints
cce_0368	Transport and binding proteins: Transport and binding proteins	ATP-binding protein of ABC transporter	0.1518	0.0772	-0.1729	-0.7748	-0.4232	-0.094	-0.677	0	0	0	1	0	0	1	2	OnlyDuringLaterTimePoints
cce_0544	Transport and binding proteins: Transport and binding proteins	magnesium and cobalt transport protein; corA	0.197	0.0715	-0.0866	-0.0415	0.6108	0.0254	0.2453	0	0	0	0	-1	0	0	2	OnlyDuringLaterTimePoints
cce_0574	Transport and binding proteins: Transport and binding proteins	GTP-binding protein, HSR1-related	0.3475	0.0122	-0.1669	0.3853	2.0123	-0.0702	2.553	0	0	0	0	-1	0	-1	2	OnlyDuringLaterTimePoints
cce_0575	Transport and binding proteins: Transport and binding proteins	ferrous iron transport protein B; feoB2	0.5706	0.1506	-0.1373	0.9284	2.6904	0.054	3.5836	0	0	0	-1	-1	0	-1	2	OnlyDuringLaterTimePoints
cce_0578	Transport and binding proteins: Transport and binding proteins	putative molybdate ABC transporter, permease protein	0.2147	0.0359	0.0463	0.7128	1.564	-0.2871	2.078	0	0	0	-1	-1	0	-1	2	OnlyDuringLaterTimePoints
cce_0825	Transport and binding proteins: Transport and binding proteins	probable sulfate transporter	0.0227	0.0885	0.0666	0.8452	0.487	-0.1623	0.4976	0	0	0	-1	0	0	0	2	OnlyDuringLaterTimePoints
cce_0846	Transport and binding proteins: Transport and binding proteins	cation-transporting ATPase, E1-E2 ATPase	0.1528	0.0355	0.0664	0.6634	-0.307	0.0497	-0.5123	0	0	0	-1	0	0	0	2	OnlyDuringLaterTimePoints
cce_0863	Transport and binding proteins: Transport and binding proteins	Na+/alanine symporter	0.2264	0.0664	0.1544	0.261	0.3362	0.7313	0.6177	0	0	0	0	0	-1	-1	2	OnlyDuringLaterTimePoints
cce_0883	Transport and binding proteins: Transport and binding proteins	phosphate ABC transporter, ATP-binding protein; pstB1	0.1246	0.32	0.3644	0.6834	0.1963	-0.0988	0.1829	0	0	0	-1	0	0	0	2	OnlyDuringLaterTimePoints
cce_0884	Transport and binding proteins: Transport and binding proteins	phosphate ABC transporter, permease protein; pstA1	0.0369	0.2735	0.2826	0.5931	0.0331	-0.3505	0.2086	0	0	0	-1	0	0	0	2	OnlyDuringLaterTimePoints
cce_0885	Transport and binding proteins: Transport and binding proteins	phosphate ABC transporter, permease protein; pstC1	-0.0258	0.1996	0.1636	0.5621	0.0443	-0.6517	0.355	0	0	0	0	0	1	0	2	OnlyDuringLaterTimePoints
cce_0886	Transport and binding proteins: Transport and binding proteins	phosphate ABC transporter, periplasmic phosphate-binding protein; pstS	0.1462	0.187	-0.1162	0.7998	0.8487	-0.2155	1.0268	0	0	0	-1	-1	0	-1	2	OnlyDuringLaterTimePoints
cce_0887	Transport and binding proteins: Transport and binding proteins	phosphate binding protein; ptsS2	0.1046	0.1198	-0.1621	-0.712	0.5499	-0.8472	0.2822	0	0	0	0	0	1	0	2	OnlyDuringLaterTimePoints
cce_1009	Transport and binding proteins: Transport and binding proteins	unknown	-0.3481	-0.4257	0.142	0.5321	-0.6909	-0.0064	-1.278	0	0	0	0	1	0	1	2	OnlyDuringLaterTimePoints
cce_1010	Transport and binding proteins: Transport and binding proteins	cation-transporting ATPase	-0.2228	-0.4172	-0.4492	0.4167	-0.1026	0.2837	-1.3302	0	0	0	0	0	0	1	2	OnlyDuringLaterTimePoints
cce_1115	Transport and binding proteins: Transport and binding proteins	probable biopolymer transport protein; exbD	0.2026	0.3144	-0.1528	0.1985	0.0528	0.6388	0.3821	0	0	0	0	0	-1	0	2	OnlyDuringLaterTimePoints
cce_1116	Transport and binding proteins: Transport and binding proteins	putative biopolymer transport protein; exbB1	0.1546	0.3156	0.0723	0.0204	0.101	0.4238	0.8417	0	0	0	0	0	0	-1	2	OnlyDuringLaterTimePoints
cce_1163	Transport and binding proteins: Transport and binding proteins	phosphate binding protein; ptsS3	0.0991	0.0433	-0.0487	-0.0067	-0.0537	-1.0237	0.4178	0	0	0	0	0	1	0	2	OnlyDuringLaterTimePoints
cce_1230	Transport and binding proteins: Transport and binding proteins	putative anion-transporting ATPase	-0.0902	0.0212	0.3071	-0.9132	0.2203	0.4084	0.5701	0	0	0	1	0	0	0	2	OnlyDuringLaterTimePoints
cce_1233	Transport and binding proteins: Transport and binding proteins	ABC transporter ATP binding subunit	-0.0513	0.0323	0.1692	0.7191	-0.1792	0.4307	0.7904	0	0	0	-1	0	0	-1	2	OnlyDuringLaterTimePoints
cce_1240	Transport and binding proteins: Transport and binding proteins	Mn2+ ABC transporter, permease protein; mntB	-0.0379	0.0371	0.1804	-0.46	-0.4695	-0.9646	-0.0391	0	0	0	0	0	1	0	2	OnlyDuringLaterTimePoints
cce_1403	Transport and binding proteins: Transport and binding proteins	Na+/solute symporter	-0.1918	-0.1931	0.0617	0.6811	-0.5333	0.1532	0.3062	0	0	0	-1	0	0	0	2	OnlyDuringLaterTimePoints
cce_1619	Transport and binding proteins: Transport and binding proteins	ammonium transport protein; cysQ	-0.0369	0.1711	0.1874	-0.2849	1.0345	0.5217	0.8978	0	0	0	0	-1	0	-1	2	OnlyDuringLaterTimePoints
cce_1759	Transport and binding proteins: Transport and binding proteins	putative polysialic acid transport protein; kpsM	0.076	0.3461	-0.1654	0.0233	0.5644	-0.0871	0.6288	0	0	0	0	0	0	-1	2	OnlyDuringLaterTimePoints
cce_1917	Transport and binding proteins: Transport and binding proteins	cation-transporting ATPase	-0.1025	-0.0142	0.0217	0.8573	-0.1412	0.0239	-0.3807	0	0	0	-1	0	0	0	2	OnlyDuringLaterTimePoints
cce_1996	Transport and binding proteins: Transport and binding proteins	Na+/H+ antiporter	-0.0652	0.039	0.5539	0.3899	-0.5871	-0.1586	-0.2204	0	0	0	0	1	0	0	2	OnlyDuringLaterTimePoints
cce_2028	Transport and binding proteins: Transport and binding proteins	ATP-binding protein of ABC transporter	0.0637	-0.3722	-0.5802	1.2153	0.1455	0.4422	0.1939	0	0	0	-1	0	0	0	2	OnlyDuringLaterTimePoints
cce_2200	Transport and binding proteins: Transport and binding proteins	putative YCF41; ycf41	-0.2998	-0.3264	0.3538	-0.345	-0.0013	-0.6934	0.4319	0	0	0	0	0	1	0	2	OnlyDuringLaterTimePoints
cce_2268	Transport and binding proteins: Transport and binding proteins	extracellular solute-binding protein, family 3	-0.0315	0.2303	0.1998	-0.3945	0.1963	0.0109	0.6085	0	0	0	0	0	0	-1	2	OnlyDuringLaterTimePoints
cce_2352	Transport and binding proteins: Transport and binding proteins	putative K+-dependent Na+/Ca+ exchanger protein	0.0457	0.0917	-0.4378	-0.9544	-0.4986	-0.8549	-0.5964	0	0	0	1	0	1	1	2	OnlyDuringLaterTimePoints
cce_2355	Transport and binding proteins: Transport and binding proteins	toxin secretion ABC transporter ATP-binding protein, HlyB family	-0.002	-0.1691	-0.2748	0.1791	0.5955	0.5021	-0.2023	0	0	0	0	-1	0	0	2	OnlyDuringLaterTimePoints
cce_2440	Transport and binding proteins: Transport and binding proteins	hypothetical protein	-0.0567	0.025	0.1789	1.0302	0.2029	-0.0275	0.3478	0	0	0	-1	0	0	0	2	OnlyDuringLaterTimePoints
cce_2606	Transport and binding proteins: Transport and binding proteins	cation-transporting ATPase	0.0574	0.0667	0.045	-0.1811	-0.9797	-0.0319	-0.9544	0	0	0	0	1	0	1	2	OnlyDuringLaterTimePoints
cce_2632	Transport and binding proteins: Transport and binding proteins	iron transport protein	-0.4724	-0.2869	0.4079	1.1879	2.3562	2.033	0.6777	0	0	0	0	0	-1	-1	2	OnlyDuringLaterTimePoints
cce_2881	Transport and binding proteins: Transport and binding proteins	ferric uptake regulation protein; fur3	0.1999	-0.0338	-0.4261	-0.7066	0.3928	-0.0389	0.5119	0	0	0	1	0	0	0	2	OnlyDuringLaterTimePoints
cce_2934	Transport and binding proteins: Transport and binding proteins	ATP-binding protein of ABC transporter	-0.0133	-0.0064	0.2024	0.4806	0.617	0.0942	0.4682	0	0	0	0	-1	0	0	2	OnlyDuringLaterTimePoints
cce_2946	Transport and binding proteins: Transport and binding proteins	branched-chain amino acid ABC transporter permease protein	0.0227	0.3015	0.0593	-0.5988	-0.9178	-0.0981	0.242	0	0	0	1	1	0	0	2	OnlyDuringLaterTimePoints
cce_3153	Transport and binding proteins: Transport and binding proteins	ABC transporter for sugars, solute-binding protein	0.0631	0.2681	-0.4138	-0.8302	0.0129	-0.3177	0.6765	0	0	0	1	0	0	-1	2	OnlyDuringLaterTimePoints
cce_3261	Transport and binding proteins: Transport and binding proteins	ammonium/methylammonium permease; amt1	0.3126	0.2686	0.0302	0.7178	-0.6558	-0.3538	-0.415	0	0	0	-1	1	0	0	2	OnlyDuringLaterTimePoints
cce_3358	Transport and binding proteins: Transport and binding proteins	putative bacterioferritin comigratory protein	-0.0358	-0.037	0.303	-0.897	0.0621	0.3466	0.9612	0	0	0	1	0	0	-1	2	OnlyDuringLaterTimePoints
cce_3400	Transport and binding proteins: Transport and binding proteins	cation efflux system protein	0.2669	0.155	-0.2149	-0.1555	-0.8185	-0.0282	-0.5594	0	0	0	0	1	0	0	2	OnlyDuringLaterTimePoints
cce_3483	Transport and binding proteins: Transport and binding proteins	putative bicarbonate transporter; bicA	0.0675	0.3154	-0.0665	-0.3837	-0.5748	-0.7311	-0.8436	0	0	0	0	0	1	0	2	OnlyDuringLaterTimePoints
cce_3503	Transport and binding proteins: Transport and binding proteins	ATP-binding protein of ABC transporter	-0.2242	0.0601	-0.1061	-1.0197	-0.1148	-0.4919	-0.1527	0	0	0	1	0	0	0	2	OnlyDuringLaterTimePoints
cce_3637	Transport and binding proteins: Transport and binding proteins	probable Na+/H+ antiporter	0.133	0.0971	-0.0037	-0.0971	-0.1887	-0.0444	-0.798	0	0	0	0	0	0	1	2	OnlyDuringLaterTimePoints
cce_3641	Transport and binding proteins: Transport and binding proteins	ATP-binding protein of ABC transporter	-0.1354	0.0414	0.2505	0.33	-1.2433	0.1286	-1.9582	0	0	0	0	0	0	1	2	OnlyDuringLaterTimePoints
cce_3642	Transport and binding proteins: Transport and binding proteins	putative ABC-2 type transport system permease protein	-0.1844	-0.0446	0.0756	0.6512	-0.4237	0.6161	-0.8282	0	0	0	-1	0	-1	1	2	OnlyDuringLaterTimePoints
cce_3765	Transport and binding proteins: Transport and binding proteins	hypothetical protein; contains a CHP730 domain	0.2559	-0.0247	-0.4041	0.0663	-0.3037	-0.1398	-1.7541	0	0	0	0	0	0	1	2	OnlyDuringLaterTimePoints
cce_3775	Transport and binding proteins: Transport and binding proteins	unknown	0.0157	-0.1319	-0.1315	-0.7543	0.4457	0.1064	0.2665	0	0	0	1	0	0	0	2	OnlyDuringLaterTimePoints
cce_3801	Transport and binding proteins: Transport and binding proteins	putative iron(III)-transport ATP-binding protein	-0.3965	-0.5043	0.058	0.9652	0.2305	0.7243	-0.5848	0	0	0	-1	0	-1	0	2	OnlyDuringLaterTimePoints
cce_3916	Transport and binding proteins: Transport and binding proteins	cation-transporting ATPase, E1-E2 type	0.0615	0.1948	0.1181	0.8305	-0.1054	0.1691	-0.4101	0	0	0	-1	0	0	0	2	OnlyDuringLaterTimePoints
cce_3971	Transport and binding proteins: Transport and binding proteins	ATP-binding protein of ABC transporter	-0.226	0.1465	0.5505	0.9434	0.1024	-0.0807	0.041	0	0	0	-1	0	0	0	2	OnlyDuringLaterTimePoints
cce_3982	Transport and binding proteins: Transport and binding proteins	putative periplasmic phosphate-binding protein of phosphate ABC transporter	0.1461	0.0414	-0.0506	-1.2647	0.6985	0.2513	0.0935	0	0	0	1	-1	0	0	2	OnlyDuringLaterTimePoints
cce_3983	Transport and binding proteins: Transport and binding proteins	hypothetical protein; contains a phosphate ABC transporter permease fragment	0.0951	0.0261	0.0011	-0.7691	0.423	0.033	-0.1079	0	0	0	1	0	0	0	2	OnlyDuringLaterTimePoints
cce_3984	Transport and binding proteins: Transport and binding proteins	ABC phosphate transport system ATP-binding protein	0.0755	-0.0103	0.0364	-0.7891	-0.4339	-0.5336	0.2551	0	0	0	1	0	0	0	2	OnlyDuringLaterTimePoints
cce_4115	Transport and binding proteins: Transport and binding proteins	devB-like ABC transporter membrane fusion protein	-0.0204	0.1163	-0.0555	0.6167	0.3396	0.1299	0.2313	0	0	0	-1	0	0	0	2	OnlyDuringLaterTimePoints
cce_4385	Transport and binding proteins: Transport and binding proteins	cation-transporting P-type ATPase	0.1976	0.0796	0.2838	0.766	-0.3604	0.4256	-0.2997	0	0	0	-1	0	0	0	2	OnlyDuringLaterTimePoints
cce_4704	Transport and binding proteins: Transport and binding proteins	Na+/H+ antiporter	0.0538	0.1523	0.3089	0.9965	0.5181	0.1674	0.2118	0	0	0	-1	0	0	0	2	OnlyDuringLaterTimePoints
cce_4914	Transport and binding proteins: Transport and binding proteins	hypothetical protein; contains a CHP730 domain	-0.1402	-0.1963	-0.2344	0.2407	-1.3683	-0.1494	-1.7017	0	0	0	0	1	0	1	2	OnlyDuringLaterTimePoints
cce_5197	Transport and binding proteins: Transport and binding proteins	phosphate binding protein; ptsS4	0.1014	-0.0693	-0.3597	-0.3966	-0.3348	-0.3324	-1.9179	0	0	0	0	0	0	1	2	OnlyDuringLaterTimePoints
cce_5202	Transport and binding proteins: Transport and binding proteins	cation-transporting ATPase, E1-E2 type	0.0433	0.0644	-0.0278	-0.3662	-0.3911	-0.3727	-1.132	0	0	0	0	0	0	1	2	OnlyDuringLaterTimePoints
cce_5204	Transport and binding proteins: Transport and binding proteins	cation-transporting ATPase, E1-E2 type	0.0307	-0.0029	-0.1455	-0.5455	-2.6204	-0.5458	-3.0272	0	0	0	0	1	0	1	2	OnlyDuringLaterTimePoints
cce_0001		hypothetical protein	0.1013	0.007	-0.3766	-0.0779	-0.6587	0.1061	-2.8674	0	0	0	0	1	0	1	2	OnlyDuringLaterTimePoints
cce_0003		hypothetical protein	0.1269	0.216	-0.0541	0.6149	-1.6855	0.0338	-2.9875	0	0	0	-1	1	0	1	2	OnlyDuringLaterTimePoints
cce_0008		hypothetical protein	0.046	-0.0584	0.2792	0.7809	1.072	-0.2221	0.1181	0	0	0	-1	-1	0	0	2	OnlyDuringLaterTimePoints
cce_0009		unknown	-0.2423	-0.0831	0.5189	0.9998	1.4061	-0.3584	0.7034	0	0	0	-1	-1	0	-1	2	OnlyDuringLaterTimePoints
cce_0017		hypothetical protein; contains a peptidase M50 domain	0.1571	0.0494	-0.329	0.192	0.448	0.3188	-0.6405	0	0	0	0	0	0	1	2	OnlyDuringLaterTimePoints
cce_0021		unknown; contains HesB/YadR/YfhF domains	-0.1727	-0.2317	-0.09	-0.0374	-0.3907	-0.1185	-0.6095	0	0	0	0	0	0	1	2	OnlyDuringLaterTimePoints
cce_0022		unknown; contains a TPR-like helical domain	0.0621	-0.1003	-0.312	-0.0127	-0.3057	0.2467	-0.7615	0	0	0	0	0	0	1	2	OnlyDuringLaterTimePoints
cce_0028		unknown; contains DUF820	0.0358	-0.1808	-0.2632	-0.0759	-0.3744	-0.0905	-0.6473	0	0	0	0	0	0	1	2	OnlyDuringLaterTimePoints
cce_0029		rfrA family pentapeptide repeat	0.2274	0.0813	0.2386	-0.4926	-2.5867	-1.2062	-2.1193	0	0	0	0	1	1	1	2	OnlyDuringLaterTimePoints
cce_0033		ferrous iron transport protein A; feoA1	0.0813	0.0454	0.149	1.7026	0.2259	0.5545	-1.1194	0	0	0	-1	0	0	1	2	OnlyDuringLaterTimePoints
cce_0034		unknown; contains a Ferritin/ribonucleotide reductase-like domain	0.1438	-0.2665	-0.4295	-0.6209	-0.1169	-0.8049	-2.298	0	0	0	1	0	1	1	2	OnlyDuringLaterTimePoints
cce_0053		unknown; contains a senescence marker protein-30 (SMP-30) domain	-0.0393	0.1022	0.0608	-0.6528	-0.3822	-0.2024	0.0847	0	0	0	1	0	0	0	2	OnlyDuringLaterTimePoints
cce_0055		putative metal-dependent phosphohydrolase	0.0405	0.2333	-0.4156	1.0697	-0.5475	0.2373	-1.3579	0	0	0	-1	0	0	1	2	OnlyDuringLaterTimePoints
cce_0056		hypothetical protein; contains an S-layer homology (SLH) domain	-0.0384	0.0753	0.1144	0.3671	-0.1798	0.7515	-0.0766	0	0	0	0	0	-1	0	2	OnlyDuringLaterTimePoints
cce_0093		unknown; contains a toll-Interleukin receptor domain	0.1044	0.0635	0.0032	-0.1779	0.0041	-0.5627	-2.1675	0	0	0	0	0	0	1	2	OnlyDuringLaterTimePoints
cce_0094		unknown	0.0521	-0.0532	-0.1679	-0.3637	-0.1695	-0.3592	-1.8281	0	0	0	0	0	0	1	2	OnlyDuringLaterTimePoints
cce_0095		hypothetical protein	0.0654	0.0368	-0.1134	-0.6808	-0.7002	-0.0223	-2.2734	0	0	0	1	1	0	1	2	OnlyDuringLaterTimePoints
cce_0096		putative NUDIX hydrolase	0.0568	-0.0216	-0.1257	-0.4946	-0.6223	0.2672	-1.827	0	0	0	0	1	0	1	2	OnlyDuringLaterTimePoints
cce_0098		conserved hypothetical protein	0.008	0.21	-0.5035	-1.1221	-0.9096	-0.6657	-0.8465	0	0	0	1	1	1	1	2	OnlyDuringLaterTimePoints
cce_0101		hypothetical protein	0.3452	-0.014	0.335	0.7661	1.6587	0.8021	1.4661	0	0	0	-1	-1	-1	-1	2	OnlyDuringLaterTimePoints
cce_0108		conserved hypothetical protein	-0.0212	0.5723	0.2031	0.2715	-1.5723	0.1828	-1.889	0	0	0	0	1	0	1	2	OnlyDuringLaterTimePoints
cce_0110		unknown; contains a transposase, IS605 OrfB domain	-0.4016	-0.4999	0.05	-0.8218	-0.6919	-0.6195	-0.5833	0	0	0	1	0	0	0	2	OnlyDuringLaterTimePoints
cce_0112		unknown	0.0968	0.1746	-0.1675	-0.6927	0.1452	0.0006	0.2968	0	0	0	1	0	0	0	2	OnlyDuringLaterTimePoints
cce_0116		unknown	0.0535	0.2093	-0.1405	-1.1616	-0.5883	-0.1431	-0.2215	0	0	0	1	0	0	0	2	OnlyDuringLaterTimePoints
cce_0118		unknown	-0.0982	-0.1211	0.1383	1.0618	-0.0167	-0.1188	-0.3428	0	0	0	-1	0	0	0	2	OnlyDuringLaterTimePoints
cce_0121		unknown; contains DUF306, Meta and HslJ	-0.1879	-0.0411	0.0031	0.7225	0.0232	0.1735	-0.3278	0	0	0	-1	0	0	0	2	OnlyDuringLaterTimePoints
cce_0129		unknown	0.3095	0.1172	-0.3939	-1.181	0.3925	-0.0121	0.0378	0	0	0	1	0	0	0	2	OnlyDuringLaterTimePoints
cce_0153		putative HAD-superfamily subfamily IA hydrolase, REG-2-like	-0.2412	-0.5374	-0.4245	0.2769	0.8716	0.1429	0.4424	0	0	0	0	-1	0	0	2	OnlyDuringLaterTimePoints
cce_0163		hypothetical protein	0.0235	0.0535	0.0944	0.1373	-0.8467	-0.614	-0.561	0	0	0	0	1	1	0	2	OnlyDuringLaterTimePoints
cce_0173		putative methionine sulfoxide reductase B	0.0281	-0.1352	0.3343	0.5266	-0.6662	0.4589	-0.6596	0	0	0	0	1	0	1	2	OnlyDuringLaterTimePoints
cce_0175		unknown	0.2921	0.1976	-0.3302	-0.7477	-0.5777	-0.1218	-1.3547	0	0	0	1	0	0	1	2	OnlyDuringLaterTimePoints
cce_0177		putative CsbD-like protein	0.025	-0.1165	-0.1996	0.1366	-0.4956	-0.201	-0.6179	0	0	0	0	0	0	1	2	OnlyDuringLaterTimePoints
cce_0192		hypothetical protein	-0.2826	-0.004	0.157	-0.1761	-1.3054	-0.8959	-0.5976	0	0	0	0	0	1	1	2	OnlyDuringLaterTimePoints
cce_0193		unknown; contains DUF1400	-0.1595	0.122	-0.0794	-0.5862	-0.9055	-0.3216	-0.6283	0	0	0	1	1	0	1	2	OnlyDuringLaterTimePoints
cce_0194		hypothetical protein	0.079	-0.0711	-0.1074	-0.5999	0.0446	-0.1	0.0778	0	0	0	1	0	0	0	2	OnlyDuringLaterTimePoints
cce_0203		conserved hypothetical protein	-0.0936	-0.0783	-0.2924	-0.7423	-0.6153	-0.2653	-0.7231	0	0	0	1	1	0	1	2	OnlyDuringLaterTimePoints
cce_0205		hypothetical protein	-0.1848	0.1149	0.4795	0.9334	-0.2063	-0.0828	-0.0968	0	0	0	-1	0	0	0	2	OnlyDuringLaterTimePoints
cce_0216		hypothetical protein	0.0468	0.0194	0.0151	-0.8569	0.1351	-0.2517	-0.3177	0	0	0	1	0	0	0	2	OnlyDuringLaterTimePoints
cce_0218		hypothetical protein	-0.2897	-0.0758	0.1491	-0.588	0.1008	-0.005	-0.5928	0	0	0	1	0	0	1	2	OnlyDuringLaterTimePoints
cce_0221		hypothetical protein; contains a Rhodanese-like domain	0.0922	0.0751	-0.3276	-0.0384	-1.2376	0.0758	-1.2697	0	0	0	0	1	0	1	2	OnlyDuringLaterTimePoints
cce_0231		putative RNA polymerase, omega subunit	-0.3594	0.2511	0.2383	0.4552	0.4913	0.891	0.5261	0	0	0	0	0	-1	0	2	OnlyDuringLaterTimePoints
cce_0233		hypothetical protein	0.2821	0.4001	-0.0937	0.5696	0.849	0.2624	0.8005	0	0	0	0	-1	0	-1	2	OnlyDuringLaterTimePoints
cce_0234		unknown; contains a stage II sporulation E domain	0.353	0.4726	-0.0648	0.8926	0.0097	-0.0179	-0.03	0	0	0	-1	0	0	0	2	OnlyDuringLaterTimePoints
cce_0235		unknown	-0.3563	0.2841	-0.1487	0.3918	-0.7727	-0.9083	-0.9717	0	0	0	0	1	1	1	2	OnlyDuringLaterTimePoints
cce_0241		hypothetical protein; contains a UbiA prenyltransferase domain	-0.0815	0.2729	0.4332	0.1947	0.25	0.7809	0.1117	0	0	0	0	0	-1	0	2	OnlyDuringLaterTimePoints
cce_0250		hypothetical protein	-0.1108	0.3106	0.0525	0.2391	-1.2166	-0.3243	-0.9066	0	0	0	0	1	0	1	2	OnlyDuringLaterTimePoints
cce_0255		unknown	-0.0451	0.0875	0.2469	0.5765	0.3684	0.3504	1.0119	0	0	0	0	0	0	-1	2	OnlyDuringLaterTimePoints
cce_0262		conserved hypothetical protein	0.1725	0.2094	-0.273	0.3233	-1.3618	0.5068	-0.905	0	0	0	0	1	0	1	2	OnlyDuringLaterTimePoints
cce_0264		unknown	0.2299	-0.0196	-0.1666	-0.1938	-0.6436	0.0566	-1.2279	0	0	0	0	1	0	1	2	OnlyDuringLaterTimePoints
cce_0268		putative HAD-superfamily phosphatase subfamily IIIA protein	-0.0829	-0.0175	0.1778	-0.7769	0.0426	-0.6168	-0.1427	0	0	0	1	0	1	0	2	OnlyDuringLaterTimePoints
cce_0269		conserved hypothetical protein	0.2445	-0.1578	-0.5051	1.067	-0.1963	0.0318	-1.3025	0	0	0	-1	0	0	1	2	OnlyDuringLaterTimePoints
cce_0270		unknown	0.1413	-0.0488	-0.3081	0.9529	0.01	-0.0887	-1.1692	0	0	0	-1	0	0	1	2	OnlyDuringLaterTimePoints
cce_0272		hypothetical protein	0.0985	-0.014	-0.1154	-0.1889	-0.3843	0.0921	-2.3266	0	0	0	0	0	0	1	2	OnlyDuringLaterTimePoints
cce_0273		hypothetical protein	0.1612	0.0509	-0.061	-0.3789	-0.6976	0.1866	-2.2713	0	0	0	0	1	0	1	2	OnlyDuringLaterTimePoints
cce_0274		hypothetical protein; contains a N-acylglucosamine 2-epimerase-type domain and a ThiJ/PfpI domain	0.08	0.0349	-0.0836	-0.2657	-0.4044	-0.0537	-1.5543	0	0	0	0	0	0	1	2	OnlyDuringLaterTimePoints
cce_0295		CHP_MG423-containing protein	0.1351	-0.0635	-0.4859	-0.3807	0.1877	0.4128	-1.0717	0	0	0	0	0	0	1	2	OnlyDuringLaterTimePoints
cce_0301		unknown; contains glutathione S-transferase, C-terminal-like and Thioredoxin fold domains	0.2781	0.3629	-0.0722	-0.3327	0.4167	0.5911	0.5241	0	0	0	0	0	-1	0	2	OnlyDuringLaterTimePoints
cce_0308		unknown	-0.1641	0.3387	0.159	-0.8191	-1.193	-0.1104	-1.3608	0	0	0	1	1	0	1	2	OnlyDuringLaterTimePoints
cce_0311		conserved hypothetical protein	-0.1507	0.041	0.3931	-0.2051	-0.1611	-0.5859	0.2111	0	0	0	0	0	1	0	2	OnlyDuringLaterTimePoints
cce_0312		hypothetical protein	-0.2132	0.1556	0.3961	-0.2903	-0.7857	-0.6693	-0.1462	0	0	0	0	1	1	0	2	OnlyDuringLaterTimePoints
cce_0317		unknown; contains an ABC-1 domain	0.2612	-0.0861	-0.4101	0.3037	0.8627	0.5389	0.4919	0	0	0	0	-1	0	0	2	OnlyDuringLaterTimePoints
cce_0318		unknown	0.2711	-0.0873	-0.5789	0.2302	0.9418	0.5708	0.1258	0	0	0	0	-1	0	0	2	OnlyDuringLaterTimePoints
cce_0323		hypothetical protein; contains a bacterial surface antigen (D15) and Polypeptide-transport-associated, ShlB-type domain	0.2042	0.0499	-0.2878	-0.1893	-0.9629	-0.5131	-0.3075	0	0	0	0	1	0	0	2	OnlyDuringLaterTimePoints
cce_0332		hypothetical protein; contains DUF124	-0.0052	-0.1252	0.2017	-0.0271	0.0042	-0.2427	0.5909	0	0	0	0	0	0	-1	2	OnlyDuringLaterTimePoints
cce_0337		unknown	-0.0326	-0.175	-0.4533	-0.7636	-0.2531	-0.0545	-0.265	0	0	0	1	0	0	0	2	OnlyDuringLaterTimePoints
cce_0364		unknown; contains a glutathione-dependent formaldehyde-activating, GFA domain	0.1392	0.1811	0.356	-0.1338	0.5681	0.0867	0.5872	0	0	0	0	0	0	-1	2	OnlyDuringLaterTimePoints
cce_0366		unknown	0.108	0.1855	0.2187	-0.3814	0.5	0.505	0.7472	0	0	0	0	0	0	-1	2	OnlyDuringLaterTimePoints
cce_0375		putative membrane protein	-0.2998	0.0277	0.1807	0.1929	0.0257	0.6221	0.0752	0	0	0	0	0	-1	0	2	OnlyDuringLaterTimePoints
cce_0385		hypothetical protein	0.0563	-0.0775	0.0064	-0.7449	0.1957	-0.6305	0.3748	0	0	0	1	0	1	0	2	OnlyDuringLaterTimePoints
cce_0389		unknown; contains a TrkA-N domain	0.1129	0.1095	0.0495	-0.4354	1.065	0.2636	0.6474	0	0	0	0	-1	0	-1	2	OnlyDuringLaterTimePoints
cce_0391		hypothetical protein; contains a Ribonucleotide reductase regulator NrdR-like domain	0.0353	0.1985	-0.217	-0.1222	-0.5828	-0.0776	-1.4695	0	0	0	0	0	0	1	2	OnlyDuringLaterTimePoints
cce_0397		hypothetical protein; contains a HTTM domain	0.0391	0.0715	0.4519	1.1396	0.2493	0.3054	0.562	0	0	0	-1	0	0	0	2	OnlyDuringLaterTimePoints
cce_0398		hypothetical protein	-0.0123	-0.0868	0.4311	1.1293	0.4563	0.1296	0.6997	0	0	0	-1	0	0	-1	2	OnlyDuringLaterTimePoints
cce_0408		hypothetical protein; contains a HNH endonuclease domain	0.0498	0.0588	-0.5549	0.1657	-0.2465	-0.1913	-0.6249	0	0	0	0	0	0	1	2	OnlyDuringLaterTimePoints
cce_0409		conserved hypothetical protein	-0.2775	0.2314	0.0328	-0.6364	-1.4351	-0.7817	-1.4107	0	0	0	1	1	1	1	2	OnlyDuringLaterTimePoints
cce_0425		unknown	-0.0995	0.0806	0.0071	0.9324	0.6948	0.0408	0.595	0	0	0	-1	-1	0	-1	2	OnlyDuringLaterTimePoints
cce_0428		conserved hypothetical protein	-0.1743	-0.2913	-0.0599	-0.4323	-0.6575	-0.2755	-0.4406	0	0	0	0	1	0	0	2	OnlyDuringLaterTimePoints
cce_0429		putative prokaryotic chromosome segregation and condensation protein ScpB	-0.0602	-0.2107	-0.4284	-0.5177	-0.4083	-0.0188	-0.9762	0	0	0	0	0	0	1	2	OnlyDuringLaterTimePoints
cce_0430		conserved hypothetical protein	0.0642	-0.1079	-0.4111	-0.3387	-0.941	-0.1153	-1.4843	0	0	0	0	1	0	1	2	OnlyDuringLaterTimePoints
cce_0431		hypothetical protein	0.0815	-0.0397	-0.2088	-0.2545	-1.1134	-0.3693	-1.9337	0	0	0	0	1	0	1	2	OnlyDuringLaterTimePoints
cce_0436		UPF0136-containing protein	-0.0257	-0.087	-0.2299	-0.5869	-0.2106	0.0992	-1.4813	0	0	0	1	0	0	1	2	OnlyDuringLaterTimePoints
cce_0437		conserved hypothetical protein	0.3167	-0.105	-0.221	-0.3126	-2.3501	-0.5638	-1.6411	0	0	0	0	1	0	1	2	OnlyDuringLaterTimePoints
cce_0441		photosystem II 22 kD protein; psb29	-0.1221	-0.129	0.1647	-0.6174	1.2119	-0.0905	0.8626	0	0	0	1	-1	0	-1	2	OnlyDuringLaterTimePoints
cce_0443		conserved hypothetical protein	-0.0318	-0.2376	0.1652	0.875	0.0336	0.1501	0.4437	0	0	0	-1	0	0	0	2	OnlyDuringLaterTimePoints
cce_0449		unknown	0.1019	-0.0752	-0.3328	-0.172	-0.1138	-0.1951	-0.6962	0	0	0	0	0	0	1	2	OnlyDuringLaterTimePoints
cce_0454		conserved hypothetical protein	0.3153	0.2243	-0.2936	-0.6008	-0.3308	-0.3168	-0.1478	0	0	0	1	0	0	0	2	OnlyDuringLaterTimePoints
cce_0459		unknown	0.2032	0.1028	0.241	0.1454	0.1296	-0.2085	-0.8953	0	0	0	0	0	0	1	2	OnlyDuringLaterTimePoints
cce_0465		conserved hypothetical protein	0.1419	0.0127	-0.4389	0.1656	-0.4673	0.0669	-1.4676	0	0	0	0	0	0	1	2	OnlyDuringLaterTimePoints
cce_0467		conserved hypothetical protein	-0.2887	-0.242	-0.0146	-0.4606	0.0035	-0.9447	-0.3954	0	0	0	0	0	1	0	2	OnlyDuringLaterTimePoints
cce_0470		hypothetical protein; contains an Anti-sigma factor antagonist domain	0.1154	0.1713	0.1126	1.3145	-0.7591	-0.0188	-0.5657	0	0	0	-1	1	0	0	2	OnlyDuringLaterTimePoints
cce_0471		unknown; contains UPF0004	0.0129	0.2445	0.4342	0.9043	-0.0713	0.1789	-0.1874	0	0	0	-1	0	0	0	2	OnlyDuringLaterTimePoints
cce_0481		unknown; contains TPR_1 tetratricopeptide repeat domains	-0.0006	-0.4152	0.0488	0.2298	-0.3068	-0.1367	-0.5961	0	0	0	0	0	0	1	2	OnlyDuringLaterTimePoints
cce_0482		putative heavy metal transport/detoxification protein	0.0246	-0.2092	0.5352	0.6092	0.2562	-0.1433	0.0975	0	0	0	-1	0	0	0	2	OnlyDuringLaterTimePoints
cce_0485		unknown; contains a GTP-binding protein, HSR1-related domain	0.0874	-0.0791	-0.1261	-0.8575	-0.0753	-0.1745	-0.0568	0	0	0	1	0	0	0	2	OnlyDuringLaterTimePoints
cce_0488		unknown; contains a GUN4-like domain	-0.167	-0.3154	-0.0329	-1.6423	0.8309	-0.5397	0.8105	0	0	0	1	-1	0	-1	2	OnlyDuringLaterTimePoints
cce_0501		hypothetical protein	0.1078	-0.1582	-0.498	-1.1574	-0.6641	-0.6322	-1.0421	0	0	0	1	1	1	1	2	OnlyDuringLaterTimePoints
cce_0504		hypothetical protein	-0.3749	-0.2892	0.1428	0.0724	-0.0949	-0.6177	0.005	0	0	0	0	0	1	0	2	OnlyDuringLaterTimePoints
cce_0508		putative phosphoenolpyruvate carboxykinase (ATP)	-0.1268	0.083	-0.3031	-1.4464	-1.7623	-1.4367	-3.32	0	0	0	1	1	1	1	2	OnlyDuringLaterTimePoints
cce_0513		unknown; contains a macrocin-O-methyltransferase domain	-0.2347	-0.1625	0.2555	0.5079	0.148	0.5963	0.1802	0	0	0	0	0	-1	0	2	OnlyDuringLaterTimePoints
cce_0514		hypothetical protein	-0.1829	-0.0501	0.4489	0.3889	0.0753	0.7914	0.1549	0	0	0	0	0	-1	0	2	OnlyDuringLaterTimePoints
cce_0524		unknown; contains a glycosyl transferase, group 1 domain	-0.1256	0.0504	0.5019	0.1668	0.1166	0.7818	0.1158	0	0	0	0	0	-1	0	2	OnlyDuringLaterTimePoints
cce_0532		hypothetical protein; contains a thioredoxin fold domain	0.0597	-0.081	0.0224	-0.7105	-0.5467	-0.0888	-0.7808	0	0	0	1	0	0	1	2	OnlyDuringLaterTimePoints
cce_0536		unknown	0.0619	0.0183	-0.293	-2.5353	-0.1936	-0.8647	-0.0011	0	0	0	1	0	1	0	2	OnlyDuringLaterTimePoints
cce_0537		unknown	0.5075	0.0619	-0.4444	-2.1509	-2.2256	-0.6263	-0.3793	0	0	0	1	1	1	0	2	OnlyDuringLaterTimePoints
cce_0539		hypothetical protein; contains EAL and PAS fold-3 domains	-0.0887	0.0193	0.0695	0.2821	0.0671	-0.2691	-0.5978	0	0	0	0	0	0	1	2	OnlyDuringLaterTimePoints
cce_0541		unknown	-0.0713	-0.0985	0.1476	0.053	0.8427	-0.6051	0.7568	0	0	0	0	-1	1	-1	2	OnlyDuringLaterTimePoints
cce_0545		putative Nitrogenase-associated protein	-0.1802	0.0098	0.0447	0.5782	2.848	-0.0179	3.1456	0	0	0	0	-1	0	-1	2	OnlyDuringLaterTimePoints
cce_0546		hypothetical protein; contains a thioredoxin fold domain	-0.2206	0.0843	-0.0254	1.7884	3.5324	0.101	3.0638	0	0	0	-1	-1	0	-1	2	OnlyDuringLaterTimePoints
cce_0562		hypothetical protein; contains a Mo-dependent nitrogenase, C-terminal domain	-0.213	-0.209	-0.1402	0.4064	2.5551	-0.051	1.9701	0	0	0	0	-1	0	-1	2	OnlyDuringLaterTimePoints
cce_0566		DUF269-containing protein	0.2383	0.1132	0.0558	0.1332	2.546	0.2508	2.548	0	0	0	0	-1	0	-1	2	OnlyDuringLaterTimePoints
cce_0567		DUF683-containing protein	0.5137	0.331	0.1463	0.6307	3.1987	0.3633	2.7077	0	0	0	0	-1	0	-1	2	OnlyDuringLaterTimePoints
cce_0572		hypothetical protein	-0.2009	-0.0871	0.1484	0.3031	2.1546	-0.0179	2.0576	0	0	0	0	-1	0	-1	2	OnlyDuringLaterTimePoints
cce_0573		conserved hypothetical protein	-0.0973	-0.1819	0.1117	0.66	2.2467	0.0365	2.0974	0	0	0	-1	-1	0	-1	2	OnlyDuringLaterTimePoints
cce_0576		ferrous iron transport protein A; feoA2	0.3305	0.1106	0.0001	1.1	2.3129	-0.0527	3.1952	0	0	0	-1	-1	0	-1	2	OnlyDuringLaterTimePoints
cce_0577		hypothetical protein; contains DUF81	0.2158	-0.0231	0.026	1.2359	2.0547	-0.0181	2.4804	0	0	0	-1	-1	0	-1	2	OnlyDuringLaterTimePoints
cce_0584		conserved hypothetical protein	-0.0356	-0.0683	0.1782	0.1941	0.6017	-0.2684	0.2852	0	0	0	0	-1	0	0	2	OnlyDuringLaterTimePoints
cce_0587		hypothetical protein; contains a phosphoribosyltransferase domain	0.1889	0.0486	0.4879	0.864	0.2809	0.0903	0.5394	0	0	0	-1	0	0	0	2	OnlyDuringLaterTimePoints
cce_0592		hypothetical protein	-0.0276	-0.1752	-0.0393	0.0532	-0.7151	-0.3721	-0.7336	0	0	0	0	1	0	1	2	OnlyDuringLaterTimePoints
cce_0597		hypothetical protein; contains DUF1400	-0.0795	-0.0541	-0.1239	0.6629	0.0759	0.1477	0.3036	0	0	0	-1	0	0	0	2	OnlyDuringLaterTimePoints
cce_0609		unknown	-0.2571	-0.1061	0.135	-1.0872	0.3102	0.2832	1.2733	0	0	0	1	0	0	-1	2	OnlyDuringLaterTimePoints
cce_0610		unknown	0.0225	0.0861	-0.0447	-0.4386	-0.9796	-0.5645	0.0771	0	0	0	0	1	0	0	2	OnlyDuringLaterTimePoints
cce_0616		unknown; contains a methyltransferase type 12 domain	-0.118	-0.0654	-0.0346	-0.5674	0.6377	-0.0961	0.573	0	0	0	0	-1	0	0	2	OnlyDuringLaterTimePoints
cce_0625		unknown; contains DUF820	-0.0512	0.1325	-0.02	0.7373	0.0313	-0.0129	-0.2666	0	0	0	-1	0	0	0	2	OnlyDuringLaterTimePoints
cce_0630		putative peptidase M50	0.1721	0.295	0.2086	0.3213	0.1899	0.8009	0.2244	0	0	0	0	0	-1	0	2	OnlyDuringLaterTimePoints
cce_0632		unknown; contains a methyltransferase type 11 domain	0.1261	-0.2023	-0.1991	-1.5881	2.5844	-0.2318	1.9035	0	0	0	1	-1	0	-1	2	OnlyDuringLaterTimePoints
cce_0642		hypothetical protein; contains DUF21 and CBS domains	0.1463	-0.0045	0.1131	0.9231	-0.4	0.2839	-0.4872	0	0	0	-1	0	0	0	2	OnlyDuringLaterTimePoints
cce_0643		conserved hypothetical protein	0.2418	-0.1912	0.1633	1.1701	-0.6473	0.3172	-0.8129	0	0	0	-1	1	0	1	2	OnlyDuringLaterTimePoints
cce_0649		hypothetical protein	-0.02	0.4112	0.242	1.7188	-0.638	0.9404	0.6788	0	0	0	-1	1	-1	-1	2	OnlyDuringLaterTimePoints
cce_0650		UPF YGGT-containing protein	-0.0494	0.0053	0.0472	-0.6692	-0.3119	-0.5211	-0.4554	0	0	0	1	0	0	0	2	OnlyDuringLaterTimePoints
cce_0658		unknown; contains an Armadillo-like helical domain	0.0041	-0.2447	-0.4617	-0.9807	-1.1351	-0.3667	-1.0682	0	0	0	1	1	0	1	2	OnlyDuringLaterTimePoints
cce_0661		putative GatB/Yqey	0.0253	0.1903	-0.0391	-0.6972	0.5436	-0.0804	0.7297	0	0	0	1	0	0	-1	2	OnlyDuringLaterTimePoints
cce_0662		unknown; contains a CHAD domain	-0.0833	0.2892	0.2032	0.6316	-0.8252	-0.1163	-1.5351	0	0	0	-1	1	0	1	2	OnlyDuringLaterTimePoints
cce_0667		hypothetical protein	0.079	0.1224	0.3852	1.0254	0.1645	-0.0702	0.228	0	0	0	-1	0	0	0	2	OnlyDuringLaterTimePoints
cce_0674		hypothetical protein	-0.0148	0.278	0.141	-0.0349	-1.0753	-0.1181	-0.3196	0	0	0	0	1	0	0	2	OnlyDuringLaterTimePoints
cce_0680		unknown	0.0742	0.0039	0.0504	-0.005	-0.2185	0.071	-0.6419	0	0	0	0	0	0	1	2	OnlyDuringLaterTimePoints
cce_0700		hypothetical protein	0.0779	-0.2464	0.0783	0.0739	-0.5048	-0.4941	-1.1686	0	0	0	0	0	0	1	2	OnlyDuringLaterTimePoints
cce_0703		unknown	-0.0768	-0.0534	0.3324	-0.1299	0.5742	0.3343	0.6219	0	0	0	0	0	0	-1	2	OnlyDuringLaterTimePoints
cce_0709		hypothetical protein	0.3861	0.2321	-0.0939	-0.3269	-0.0005	-1.6021	0.8867	0	0	0	0	0	1	0	2	OnlyDuringLaterTimePoints
cce_0725		hypothetical protein	-0.0525	0.0264	0.1921	-0.2047	-1.0584	-0.6922	-0.1431	0	0	0	0	1	1	0	2	OnlyDuringLaterTimePoints
cce_0733		hypothetical protein	0.1042	0.0177	0.1729	-0.3144	0.7818	0.4687	0.4447	0	0	0	0	-1	0	0	2	OnlyDuringLaterTimePoints
cce_0738		WD40-like beta-propeller protein	0.1805	-0.0495	-0.1935	-0.5018	-0.1537	0.2245	-1.045	0	0	0	0	0	0	1	2	OnlyDuringLaterTimePoints
cce_0741		conserved hypothetical protein	0.0295	0.2636	0.1018	-0.237	-1.5741	-0.7979	-1.0081	0	0	0	0	1	1	1	2	OnlyDuringLaterTimePoints
cce_0750		hypothetical protein	-0.0907	0.1405	0.4878	0.5396	0.4173	-0.0198	0.8188	0	0	0	0	0	0	-1	2	OnlyDuringLaterTimePoints
cce_0751		hypothetical protein; contains a glycosyl transferase, family 2 domain	0.1628	0.1305	0.2606	0.8834	-0.0618	0.6388	0.431	0	0	0	-1	0	-1	0	2	OnlyDuringLaterTimePoints
cce_0752		putative 4Fe-4S cluster binding protein	0.1976	-0.2505	0.0023	0.4829	-0.6058	0.3144	-0.2632	0	0	0	0	1	0	0	2	OnlyDuringLaterTimePoints
cce_0756		hypothetical protein	0.0681	0.2158	0.0595	0.2903	-0.2333	0.2268	-0.589	0	0	0	0	0	0	1	2	OnlyDuringLaterTimePoints
cce_0757		unknown	0.1206	0.1944	-0.2428	0.3359	-0.5667	0.2405	-0.9743	0	0	0	0	0	0	1	2	OnlyDuringLaterTimePoints
cce_0759		unknown	-0.2393	-0.1879	0.1602	0.4302	-0.8694	-0.4457	-0.5285	0	0	0	0	1	0	0	2	OnlyDuringLaterTimePoints
cce_0764		unknown; contains TPR_1 tetratricopeptide repeat domains	0.0467	0.023	0.0943	0.2998	0.326	0.8283	0.142	0	0	0	0	0	-1	0	2	OnlyDuringLaterTimePoints
cce_0773		unknown	-0.1307	-0.0323	-0.045	-0.2045	-0.5676	-0.6829	-0.7405	0	0	0	0	0	1	1	2	OnlyDuringLaterTimePoints
cce_0776		photosystem II protein Q; psbQ	0.2621	-0.059	-0.1493	-1.2101	-0.0282	-0.8468	1.1545	0	0	0	1	0	1	-1	2	OnlyDuringLaterTimePoints
cce_0788		unknown; contains a peptidase S8 and S53 domain	0.267	-0.0308	-0.1551	0.8682	-0.3127	0.5395	-0.2405	0	0	0	-1	0	0	0	2	OnlyDuringLaterTimePoints
cce_0791		hypothetical protein	0.3058	0.1257	-0.0159	-0.2078	-1.0385	-0.1997	-1.7084	0	0	0	0	1	0	1	2	OnlyDuringLaterTimePoints
cce_0793		unknown; contains a cupredoxin domain	0.0882	0.0549	-0.1116	0.4016	-0.6114	0.3167	-0.8207	0	0	0	0	1	0	1	2	OnlyDuringLaterTimePoints
cce_0806		unknown; contains a rieske [2Fe-2S] region domain	-0.0552	0.2742	0.1478	-0.561	0.0966	0.2225	0.6077	0	0	0	0	0	0	-1	2	OnlyDuringLaterTimePoints
cce_0812		hypothetical protein	0.0328	-0.3984	-0.3578	0.1147	-0.8867	0.1332	-0.3687	0	0	0	0	1	0	0	2	OnlyDuringLaterTimePoints
cce_0819		conserved hypothetical protein	0.0832	0.1285	0.3228	-0.1878	0.5929	0.0933	0.4883	0	0	0	0	-1	0	0	2	OnlyDuringLaterTimePoints
cce_0820		unknown	0.1208	0.1299	0.0232	0.0473	0.8728	0.12	0.3764	0	0	0	0	-1	0	0	2	OnlyDuringLaterTimePoints
cce_0828		unknown	0.1454	0.178	0.0389	-0.6023	0.4653	0.1817	-0.0342	0	0	0	1	0	0	0	2	OnlyDuringLaterTimePoints
cce_0834		exopolysaccharide synthesis protein; exoD1	-0.2001	0.4488	0.3426	0.1771	0.3668	0.9844	0.7646	0	0	0	0	0	-1	-1	2	OnlyDuringLaterTimePoints
cce_0840		unknown	0.203	0.0903	-0.3039	0.2901	-0.6195	-0.1955	-0.5839	0	0	0	0	1	0	0	2	OnlyDuringLaterTimePoints
cce_0845		hypothetical protein	-0.3553	-0.313	0.2133	-0.8259	0.4483	-1.1505	1.0718	0	0	0	1	0	1	-1	2	OnlyDuringLaterTimePoints
cce_0848		hypothetical protein	-0.3348	-0.4794	0.2996	1.2393	0.147	0.4963	0.2456	0	0	0	-1	0	0	0	2	OnlyDuringLaterTimePoints
cce_0853		unknown; contains a phosphoribosyltransferase domain	-0.0589	0.2583	0.0306	-0.5538	-1.1958	-0.2361	-2.9323	0	0	0	0	1	0	1	2	OnlyDuringLaterTimePoints
cce_0867		hypothetical protein	0.0938	0.217	0.2949	0.2209	-1.1133	-1.1899	-0.433	0	0	0	0	1	1	0	2	OnlyDuringLaterTimePoints
cce_0869		unknown	0.3753	0.4379	0.1618	-0.219	0.9862	-0.252	-0.3063	0	0	0	0	-1	0	0	2	OnlyDuringLaterTimePoints
cce_0872		putative UCP014873	0.2684	0.1808	0.3411	0.5654	0.6775	-0.3489	0.395	0	0	0	0	-1	0	0	2	OnlyDuringLaterTimePoints
cce_0873		hypothetical protein	0.077	-0.0044	-0.0773	-0.6833	-2.9715	-1.341	0.6224	0	0	0	0	1	1	-1	2	OnlyDuringLaterTimePoints
cce_0876		hypothetical protein; contains an acid phosphatase/vanadium-dependent haloperoxidase domain	0.0459	0.0036	-0.2261	-1.226	0.1974	-0.5311	0.4626	0	0	0	1	0	0	0	2	OnlyDuringLaterTimePoints
cce_0881		unknown; contains DUF29	0.2819	0.1784	-0.1551	-0.0048	-1.1539	-0.2413	-0.4561	0	0	0	0	1	0	0	2	OnlyDuringLaterTimePoints
cce_0889		conserved hypothetical protein	0.0816	0.0365	-0.285	-0.5537	-0.9733	-0.2399	-1.8052	0	0	0	0	1	0	1	2	OnlyDuringLaterTimePoints
cce_0891		unknown; contains an outer membrane efflux protein domain	0.032	-0.0851	0.1015	0.482	-0.1141	0.1795	-0.8035	0	0	0	0	0	0	1	2	OnlyDuringLaterTimePoints
cce_0899		hypothetical protein	-0.0321	-0.0411	-0.016	0.2077	-0.1317	-0.7272	0.0495	0	0	0	0	0	1	0	2	OnlyDuringLaterTimePoints
cce_0901		hypothetical protein; contains DUF1622	-0.226	-0.0115	0.2597	0.128	-0.7298	-0.392	-0.8548	0	0	0	0	1	0	1	2	OnlyDuringLaterTimePoints
cce_0905		rfrA family pentapeptide repeat	-0.1041	0.2568	-0.022	-0.3913	-0.6937	-0.3638	-0.6258	0	0	0	0	1	0	1	2	OnlyDuringLaterTimePoints
cce_0915		unknown	-0.098	-0.0776	-0.0452	-1.2458	0.783	-0.0754	0.77	0	0	0	1	-1	0	-1	2	OnlyDuringLaterTimePoints
cce_0924		unknown; contains a glycosyl transferase, family 9 domain	0.2793	0.3349	0.2398	0.7996	0.5116	0.3519	0.7748	0	0	0	-1	0	0	-1	2	OnlyDuringLaterTimePoints
cce_0925		hypothetical protein	0.2463	0.0851	0.208	-0.6178	0.3876	-0.4876	0.6604	0	0	0	1	0	0	-1	2	OnlyDuringLaterTimePoints
cce_0945		unknown	0.0225	0.0782	-0.1922	-0.3873	-1.311	-0.302	-0.5562	0	0	0	0	1	0	0	2	OnlyDuringLaterTimePoints
cce_0946		DUF152-containing protein	0.0382	0.0574	-0.2637	-0.3397	-1.0466	-0.1259	-0.7072	0	0	0	0	1	0	1	2	OnlyDuringLaterTimePoints
cce_0954		unknown	-0.0691	0.0651	0.1221	-0.5959	-0.2069	-0.2815	0.1211	0	0	0	1	0	0	0	2	OnlyDuringLaterTimePoints
cce_0955		hypothetical protein; contains a phage Gp37Gp68 domain	-0.184	0.2104	-0.036	-0.7147	-0.5917	-0.3159	-0.3616	0	0	0	1	1	0	0	2	OnlyDuringLaterTimePoints
cce_0959		hypothetical protein	-0.0173	-0.2291	-0.0389	-0.6032	-1.8804	-0.4874	-3.7441	0	0	0	1	1	0	1	2	OnlyDuringLaterTimePoints
cce_0960		unknown	-0.0232	0.0075	-0.0735	-0.2548	-0.8109	-0.0273	-2.4911	0	0	0	0	1	0	1	2	OnlyDuringLaterTimePoints
cce_0968		conserved hypothetical protein	0.0849	-0.0416	0.1644	0.5531	0.0564	-0.5952	-0.2284	0	0	0	0	0	1	0	2	OnlyDuringLaterTimePoints
cce_0981		hypothetical protein	0.0263	0.0243	0.1155	-0.3508	-0.22	-0.6358	-0.1087	0	0	0	0	0	1	0	2	OnlyDuringLaterTimePoints
cce_0986		unknown; contains a methyltransferase type 11 domain	-0.1005	0.002	0.1916	-0.5114	1.1096	0.1458	0.689	0	0	0	0	-1	0	-1	2	OnlyDuringLaterTimePoints
cce_0988		probable Haloacid dehalogenase-like hydrolase, type 3	-0.1272	-0.1386	0.0868	-0.9636	0.1532	-0.6219	0.3622	0	0	0	1	0	0	0	2	OnlyDuringLaterTimePoints
cce_0992		conserved hypothetical protein	-0.2749	0.5799	0.5814	-0.8118	-1.3855	-0.7146	-1.0533	0	0	0	1	1	1	1	2	OnlyDuringLaterTimePoints
cce_1006		unknown; contains a FAD linked oxidase, N-terminal domain	0.0389	0.0467	-0.0499	-0.126	0.6668	0.3181	0.2397	0	0	0	0	-1	0	0	2	OnlyDuringLaterTimePoints
cce_1011		hypothetical protein	0.1227	-0.0319	-0.1063	0.1242	-0.0706	0.1845	-0.9456	0	0	0	0	0	0	1	2	OnlyDuringLaterTimePoints
cce_1012		unknown	0.1748	0.1964	0.0615	0.207	-0.5092	0.2631	-1.3712	0	0	0	0	0	0	1	2	OnlyDuringLaterTimePoints
cce_1018		putative 2-phosphosulfolactate phosphatase	0.0751	0.066	-0.2656	-0.6377	0.6516	0.216	0.6212	0	0	0	1	-1	0	-1	2	OnlyDuringLaterTimePoints
cce_1020		hypothetical protein	-0.0513	-0.0748	-0.053	-0.8686	0.1698	-0.0885	0.2517	0	0	0	1	0	0	0	2	OnlyDuringLaterTimePoints
cce_1031		putative PspA/IM30	0.2555	0.305	-0.2977	0.3288	1.0844	0.9489	0.1203	0	0	0	0	-1	-1	0	2	OnlyDuringLaterTimePoints
cce_1034		unknown; contains a Ferritin/ribonucleotide reductase-like domain	0.2931	0.1158	0.4896	0.4545	1.3124	0.6036	0.7017	0	0	0	0	-1	-1	-1	2	OnlyDuringLaterTimePoints
cce_1035		putative Iron permease FTR1	0.0721	-0.1191	0.3131	0.2295	0.9764	0.0009	0.3885	0	0	0	0	-1	0	0	2	OnlyDuringLaterTimePoints
cce_1041		hypothetical protein; contains DUF323	0.0288	-0.1889	0.1782	-1.3391	0.4766	0.1257	0.3675	0	0	0	1	0	0	0	2	OnlyDuringLaterTimePoints
cce_1042		putative UCP018005	0.2996	0.2346	0.3635	-2.0361	0.5679	0.001	0.9336	0	0	0	1	0	0	-1	2	OnlyDuringLaterTimePoints
cce_1044		hypothetical protein	0.018	-0.399	-0.0057	0.1542	-0.2275	-0.2812	-0.7149	0	0	0	0	0	0	1	2	OnlyDuringLaterTimePoints
cce_1045		unknown	0.1481	-0.2341	-0.3224	-1.0157	-1.1838	-0.3132	-0.9562	0	0	0	0	1	0	1	2	OnlyDuringLaterTimePoints
cce_1046		unknown	-0.1883	-0.1006	-0.0951	-0.9857	-1.2207	-0.671	-0.3453	0	0	0	1	1	0	0	2	OnlyDuringLaterTimePoints
cce_1047		hypothetical protein	0.077	-0.1417	-0.2253	0.1078	-1.0821	-0.2338	-0.3691	0	0	0	0	1	0	0	2	OnlyDuringLaterTimePoints
cce_1053		conserved hypothetical protein	-0.0114	-0.4784	0.0225	0.8155	-0.4674	0.4435	-0.401	0	0	0	-1	0	0	0	2	OnlyDuringLaterTimePoints
cce_1054		unknown	0.066	-0.1343	-0.2365	-0.1709	-2.0359	-0.6117	-3.3024	0	0	0	0	1	1	1	2	OnlyDuringLaterTimePoints
cce_1055		hypothetical protein	0.129	0.0478	-0.179	-0.0658	-1.4514	-0.3162	-3.4668	0	0	0	0	1	0	1	2	OnlyDuringLaterTimePoints
cce_1056		hypothetical protein	0.117	-0.0427	-0.0852	-0.0472	-1.3695	-0.1314	-2.9873	0	0	0	0	1	0	1	2	OnlyDuringLaterTimePoints
cce_1057		putative L-asparaginase II	-0.0192	0.2466	0.3012	0.4792	-0.1802	1.1394	0.1936	0	0	0	0	0	-1	0	2	OnlyDuringLaterTimePoints
cce_1058		DUF1230-containing protein	0.0224	0.2093	-0.1715	0.4205	-0.2796	0.803	-0.3841	0	0	0	0	0	-1	0	2	OnlyDuringLaterTimePoints
cce_1059		putative Iojap-related protein	0.0126	0.281	-0.3821	0.904	-0.4037	0.4085	-1.2518	0	0	0	-1	0	0	1	2	OnlyDuringLaterTimePoints
cce_1060		conserved hypothetical protein	0.1013	0.5541	0.3156	1.2885	-0.1735	0.3731	-1.2922	0	0	0	-1	0	0	1	2	OnlyDuringLaterTimePoints
cce_1069		hypothetical protein	-0.0887	-0.0156	0.0292	0.3202	-0.8801	-0.4459	-0.0281	0	0	0	0	1	0	0	2	OnlyDuringLaterTimePoints
cce_1070		hypothetical protein	-0.2476	-0.2845	-0.0461	0.0344	-0.1509	-0.8541	0.2042	0	0	0	0	0	1	0	2	OnlyDuringLaterTimePoints
cce_1076		hypothetical protein; contains a GUN4-like domain and a Peptidase, trypsin-like serine and cysteine domain	0.2916	0.1888	-0.2269	0.0783	-0.7074	-0.1994	-1.1633	0	0	0	0	1	0	1	2	OnlyDuringLaterTimePoints
cce_1077		hypothetical protein	0.35	0.486	-0.2069	1.338	-1.4894	0.4837	-0.7969	0	0	0	-1	1	0	1	2	OnlyDuringLaterTimePoints
cce_1080		unknown; contains a metallophosphoesterase domain	0.0342	0.0088	0.1902	-0.1293	-0.4656	0.3705	-0.6869	0	0	0	0	0	0	1	2	OnlyDuringLaterTimePoints
cce_1081		unknown; contains a TPR-like helical domain	-0.1474	-0.3782	-0.2699	1.2513	0.2312	0.8486	0.425	0	0	0	-1	0	-1	0	2	OnlyDuringLaterTimePoints
cce_1082		hypothetical protein; contains DUF820	-0.3241	-0.4837	0.1746	-0.8129	-0.2126	-0.2811	0.3598	0	0	0	1	0	0	0	2	OnlyDuringLaterTimePoints
cce_1091		DUF360-containing protein	0.3771	0.2476	-0.0626	0.9431	-0.4453	0.3415	-1.4309	0	0	0	-1	0	0	1	2	OnlyDuringLaterTimePoints
cce_1093		hypothetical protein; contains a TROVE domain	-0.0194	0.248	0.1644	0.0377	-0.894	-0.3143	-0.4962	0	0	0	0	1	0	0	2	OnlyDuringLaterTimePoints
cce_1097		hypothetical protein	-0.298	0.0327	-0.0034	-1.5493	-0.6451	-0.7726	-0.4681	0	0	0	1	1	1	0	2	OnlyDuringLaterTimePoints
cce_1100		hypothetical protein	0.0579	-0.057	0.3124	0.2968	0.7143	0.2122	0.3106	0	0	0	0	-1	0	0	2	OnlyDuringLaterTimePoints
cce_1112		unknown; contains a Band 7 domain	0.0625	0.0784	0.2145	-0.0233	0.687	-0.3639	0.2245	0	0	0	0	-1	0	0	2	OnlyDuringLaterTimePoints
cce_1122		hypothetical protein	0.117	0.2471	0.1379	1.1738	-0.0168	0.2734	0.2509	0	0	0	-1	0	0	0	2	OnlyDuringLaterTimePoints
cce_1123		hypothetical protein	0.0992	0.0616	0.1084	0.8247	-0.8066	-0.1897	-0.2311	0	0	0	-1	1	0	0	2	OnlyDuringLaterTimePoints
cce_1127		putative killer suppression protein HigA	0.0306	-0.0849	-0.2015	0.4361	-0.3466	-0.4205	-0.7083	0	0	0	0	0	0	1	2	OnlyDuringLaterTimePoints
cce_1130		hypothetical protein	0.2496	0.1777	0.4658	0.1043	-1.4812	-0.3266	-0.3599	0	0	0	0	1	0	0	2	OnlyDuringLaterTimePoints
cce_1134		unknown	-0.0237	0.2458	-0.2931	1.9063	0.8109	0.2325	0.775	0	0	0	-1	-1	0	0	2	OnlyDuringLaterTimePoints
cce_1141		hypothetical protein	0.1768	-0.1221	0.1937	0.0655	-0.4602	0.0935	-0.7378	0	0	0	0	0	0	1	2	OnlyDuringLaterTimePoints
cce_1142		hypothetical protein	0.1659	0.0031	0.2277	0.6952	-0.2698	0.1821	-0.7965	0	0	0	-1	0	0	1	2	OnlyDuringLaterTimePoints
cce_1155		Peptidase M48, Ste24p	0.0421	0.0092	0.3464	2.4233	-0.0247	-0.2594	0.0169	0	0	0	-1	0	0	0	2	OnlyDuringLaterTimePoints
cce_1167		conserved hypothetical protein	-0.0108	0.1144	0.1079	-0.4891	0.5919	0.2845	0.7368	0	0	0	0	-1	0	-1	2	OnlyDuringLaterTimePoints
cce_1169		unknown; contains a Lipolytic enzyme, G-D-S-L domain	-0.157	0.417	0.2099	0.9973	-0.023	0.3756	0.4501	0	0	0	-1	0	0	0	2	OnlyDuringLaterTimePoints
cce_1170		hypothetical protein; contains a glycosyl transferase, family 2 domain	0.0368	0.0705	-0.0071	-0.0071	0.1991	0.6482	0.5268	0	0	0	0	0	-1	0	2	OnlyDuringLaterTimePoints
cce_1180		unknown; contains a cupredoxin domain	0.042	0.0513	0.2397	0.0813	-0.5926	-0.4215	0.0783	0	0	0	0	1	0	0	2	OnlyDuringLaterTimePoints
cce_1182		hypothetical protein	0.1496	0.3715	0.227	0.5691	-2.3096	-1.425	-1.0193	0	0	0	0	1	1	1	2	OnlyDuringLaterTimePoints
cce_1197		hypothetical protein	0.0883	0.0184	-0.0268	0.1066	-0.8013	-0.248	-0.9334	0	0	0	0	1	0	1	2	OnlyDuringLaterTimePoints
cce_1198		hypothetical protein; contains DUF48 and CRISPR-associated protein Cas4 domains	0.0725	0.0057	-0.0578	-0.0422	-0.3188	-0.6352	-0.3852	0	0	0	0	0	1	0	2	OnlyDuringLaterTimePoints
cce_1199		DUF196-containing protein	0.3263	0.1479	-0.2144	-0.0853	-0.6269	-0.3832	-0.6172	0	0	0	0	1	0	1	2	OnlyDuringLaterTimePoints
cce_1201		hypothetical protein; contains DUF29	0.3493	-0.1007	-0.2278	-0.8706	-0.516	-0.3054	-0.4427	0	0	0	1	0	0	0	2	OnlyDuringLaterTimePoints
cce_1212		hypothetical protein	0.1277	0.0078	0.0551	-0.009	-3.3852	-1.1456	0.0976	0	0	0	0	1	0	0	2	OnlyDuringLaterTimePoints
cce_1215		unknown	0.0691	0.1474	-0.0794	0.6184	-0.1417	0.4696	0.0249	0	0	0	-1	0	0	0	2	OnlyDuringLaterTimePoints
cce_1216		unknown; contains DUF820	0.1358	0.2402	-0.0508	0.7024	0.1827	0.7878	0.1906	0	0	0	-1	0	0	0	2	OnlyDuringLaterTimePoints
cce_1218		hypothetical protein; contains UPF0150	0.1817	0.0168	-0.1392	0.3625	-0.4526	0.0997	-0.6004	0	0	0	0	0	0	1	2	OnlyDuringLaterTimePoints
cce_1219		hypothetical protein; contains aYcfA domain	0.34	0.1087	-0.314	0.3544	-0.8678	0.2729	-1.0101	0	0	0	0	1	0	1	2	OnlyDuringLaterTimePoints
cce_1221		hypothetical protein	0.3071	0.0342	-0.3147	0.333	-0.3827	0.2851	-0.8907	0	0	0	0	0	0	1	2	OnlyDuringLaterTimePoints
cce_1231		unknown	-0.1423	-0.2322	0.3207	-0.6354	-0.4398	0.2554	0.0979	0	0	0	1	0	0	0	2	OnlyDuringLaterTimePoints
cce_1236		unknown; contains DUF820	-0.0048	-0.0703	0.2417	-0.5238	-0.5875	-0.5786	-0.3291	0	0	0	0	1	0	0	2	OnlyDuringLaterTimePoints
cce_1239		hypothetical protein; contains TPR_1 tetratricopeptide repeat domains	0.1128	0.0612	-0.327	-0.6929	0.4523	-0.356	-0.254	0	0	0	1	0	0	0	2	OnlyDuringLaterTimePoints
cce_1246		putative permease YjgP/YjgQ	0.1474	-0.0495	-0.0743	0.4656	0.177	0.5903	0.2083	0	0	0	0	0	-1	0	2	OnlyDuringLaterTimePoints
cce_1251		unknown	0.3251	0.2195	-0.513	-0.768	0.2225	-0.5306	-0.3304	0	0	0	1	0	0	0	2	OnlyDuringLaterTimePoints
cce_1252		unknown; contains DUF1214 and DUF1254	0.286	0.1874	-0.3486	-0.613	0.5848	-0.31	-0.1292	0	0	0	1	0	0	0	2	OnlyDuringLaterTimePoints
cce_1256		unknown	0.0727	0.0721	0.2642	-2.0437	0.5479	-0.6147	0.98	0	0	0	1	0	1	-1	2	OnlyDuringLaterTimePoints
cce_1257		unknown	0.1115	0.1626	0.219	-1.3008	0.2659	-0.854	0.634	0	0	0	1	0	1	-1	2	OnlyDuringLaterTimePoints
cce_1259		unknown	-0.0468	-0.0107	0.0217	0.0802	0.6017	-0.2206	0.1743	0	0	0	0	-1	0	0	2	OnlyDuringLaterTimePoints
cce_1276		hypothetical protein	0.036	-0.0518	0.45	0.9298	-0.1805	0.3107	-0.1499	0	0	0	-1	0	0	0	2	OnlyDuringLaterTimePoints
cce_1282		UPF0004-containing protein	-0.0551	-0.0582	-0.1564	0.6529	-0.5983	0.2005	-0.5237	0	0	0	-1	1	0	0	2	OnlyDuringLaterTimePoints
cce_1283		unknown	0.0956	0.1785	0.076	0.8715	-0.3096	0.6819	0.1032	0	0	0	-1	0	-1	0	2	OnlyDuringLaterTimePoints
cce_1286		unknown; contains a UspA domain	0.1192	-0.0141	0.1994	0.0018	0.7261	0.5299	0.4461	0	0	0	0	-1	0	0	2	OnlyDuringLaterTimePoints
cce_1287		unknown; contains an aldo/keto reductase domain	-0.1401	-0.0686	-0.0998	-0.1775	0.284	0.3274	0.6713	0	0	0	0	0	0	-1	2	OnlyDuringLaterTimePoints
cce_1298		conserved hypothetical protein	-0.4885	-0.0738	0.3432	-0.1533	0.4099	-0.1791	0.9094	0	0	0	0	0	0	-1	2	OnlyDuringLaterTimePoints
cce_1301		unknown; contains TPR_1 tetratricopeptide repeat domains	-0.0635	-0.0291	0.3148	0.052	-0.9404	-0.0209	-0.8309	0	0	0	0	1	0	1	2	OnlyDuringLaterTimePoints
cce_1316		unknown; contains an ankyrin domain	-0.0047	-0.0896	-0.2339	-0.7617	0.2802	-0.0271	0.2985	0	0	0	1	0	0	0	2	OnlyDuringLaterTimePoints
cce_1332		hypothetical protein	-0.2953	0.3194	-0.0018	-0.4196	-1.0525	-0.5804	-0.1766	0	0	0	0	1	0	0	2	OnlyDuringLaterTimePoints
cce_1338		putative 23S rRNA methyltransferase/RumA	-0.0681	-0.0397	0.0151	-0.0067	0.2836	0.3047	-0.6608	0	0	0	0	0	0	1	2	OnlyDuringLaterTimePoints
cce_1339		unknown	-0.016	0.1516	-0.0114	-0.2769	0.1671	0.276	-0.6098	0	0	0	0	0	0	1	2	OnlyDuringLaterTimePoints
cce_1348		hypothetical protein	0.0436	-0.0271	-0.0698	-0.0397	-0.41	0.0463	-0.6053	0	0	0	0	0	0	1	2	OnlyDuringLaterTimePoints
cce_1352		unknown	0.0077	-0.3588	-0.0693	1.1979	0.0233	0.524	0.0539	0	0	0	-1	0	0	0	2	OnlyDuringLaterTimePoints
cce_1364		putative 60 kD inner membrane insertion protein	-0.0215	0.1343	0.0337	-0.1549	0.8146	0.5782	0.975	0	0	0	0	-1	0	-1	2	OnlyDuringLaterTimePoints
cce_1365		unknown	-0.003	0.0768	0.0618	-0.4116	0.4997	0.7986	1.1424	0	0	0	0	0	-1	-1	2	OnlyDuringLaterTimePoints
cce_1369		unknown	0.0065	-0.1019	-0.2877	-0.9875	0.4494	-0.4333	0.4538	0	0	0	1	0	0	0	2	OnlyDuringLaterTimePoints
cce_1380		DUF1001-containing protein	-0.0066	0.0948	0.048	-0.6944	0.6951	-0.0193	0.7045	0	0	0	1	-1	0	-1	2	OnlyDuringLaterTimePoints
cce_1387		tripartite ATP-independent periplasmic transporter, DctQ component	-0.1702	0.3283	0.5816	-0.0314	0.1404	0.1657	0.9028	0	0	0	0	0	0	-1	2	OnlyDuringLaterTimePoints
cce_1389		unknown; contains a Rhodanese-like domain	-0.0855	0.2092	0.0799	0.0699	-0.8461	0.0917	0.1526	0	0	0	0	1	0	0	2	OnlyDuringLaterTimePoints
cce_1407		unknown; contains a cupin, RmlC-type domain	-0.2511	-0.0971	0.1238	-0.3346	0.2711	-0.322	0.9084	0	0	0	0	0	0	-1	2	OnlyDuringLaterTimePoints
cce_1414		unknown	0.1622	0.3429	0.2741	-0.622	0.1733	0.1704	0.9274	0	0	0	1	0	0	-1	2	OnlyDuringLaterTimePoints
cce_1417		hypothetical protein	-0.0468	0.353	0.3052	-0.6551	-1.4395	-1.0307	-0.9768	0	0	0	1	1	1	1	2	OnlyDuringLaterTimePoints
cce_1419		unknown; contains DUF1400	0.0455	-0.3513	-0.4322	1.7259	0.5387	0.4566	0.3548	0	0	0	-1	0	0	0	2	OnlyDuringLaterTimePoints
cce_1430		unknown; contains a short-chain dehydrogenase/reductase SDR domain	0.1724	0.096	-0.4642	-0.2124	1.0916	-0.0053	0.7706	0	0	0	0	-1	0	-1	2	OnlyDuringLaterTimePoints
cce_1432		hypothetical protein	0.0387	0.0345	0.1678	1.2593	0.9314	-0.2713	0.0074	0	0	0	-1	-1	0	0	2	OnlyDuringLaterTimePoints
cce_1435		hypothetical protein; contains an EAL signaling domain	0.0131	-0.0525	-0.1437	0.4138	-0.0692	0.1381	-0.6468	0	0	0	0	0	0	1	2	OnlyDuringLaterTimePoints
cce_1436		hypothetical protein	0.0684	0.0791	-0.0224	0.6575	-0.2329	0.1861	-0.5785	0	0	0	-1	0	0	0	2	OnlyDuringLaterTimePoints
cce_1442		unknown	0.1772	0.0229	-0.119	-0.0741	-1.3847	-0.4019	-1.1985	0	0	0	0	1	0	1	2	OnlyDuringLaterTimePoints
cce_1446		hypothetical protein	-0.0935	-0.0048	0.3638	-0.3614	-0.2831	-0.7133	0.2642	0	0	0	0	0	1	0	2	OnlyDuringLaterTimePoints
cce_1452		unknown	0.0781	0.0238	-0.0629	-0.127	-0.681	-0.1383	-0.5954	0	0	0	0	1	0	0	2	OnlyDuringLaterTimePoints
cce_1453		hypothetical protein	0.2089	0.1758	0.2062	0.0647	-0.9055	-0.4576	-0.5847	0	0	0	0	1	0	0	2	OnlyDuringLaterTimePoints
cce_1454		unknown	0.1864	0.4032	0.3268	0.4563	0.3992	1.1287	1.3744	0	0	0	0	0	-1	-1	2	OnlyDuringLaterTimePoints
cce_1462		unknown	0.432	0.3653	0.5473	1.2549	1.2823	0.5799	0.8187	0	0	0	-1	-1	0	-1	2	OnlyDuringLaterTimePoints
cce_1463		unknown	0.369	0.1957	0.4326	1.1086	1.2216	0.5903	0.6938	0	0	0	-1	-1	-1	-1	2	OnlyDuringLaterTimePoints
cce_1465		hypothetical protein	-0.049	0.3622	-0.0221	-0.6166	-5.3795	-2.3825	-2.246	0	0	0	1	1	1	1	2	OnlyDuringLaterTimePoints
cce_1471		putative ABC-2 type transporter	0.2248	0.2035	0.0251	0.8172	-0.3288	0.6518	-0.796	0	0	0	-1	0	-1	1	2	OnlyDuringLaterTimePoints
cce_1476		hypothetical protein; contains DUF6, transmembrane	-0.147	0.314	0.0742	-0.8782	0.6937	0.2296	0.6815	0	0	0	1	-1	0	-1	2	OnlyDuringLaterTimePoints
cce_1477		unknown	0.1715	0.3223	-0.3952	-2.0932	0.009	-0.0997	0.0912	0	0	0	1	0	0	0	2	OnlyDuringLaterTimePoints
cce_1480		putative holliday junction resolvase, YqgF family	0.0101	-0.2534	-0.1359	0.6172	0.0662	-0.3195	0.1476	0	0	0	-1	0	0	0	2	OnlyDuringLaterTimePoints
cce_1482		conserved hypothetical protein	0.1182	-0.381	0.2745	1.2791	-0.2232	-0.2455	0.3427	0	0	0	-1	0	0	0	2	OnlyDuringLaterTimePoints
cce_1497		hypothetical protein	0.1271	0.0713	-0.1584	0.1392	-0.5877	0.1318	-0.6101	0	0	0	0	1	0	1	2	OnlyDuringLaterTimePoints
cce_1510		putative F0F1-ATPase subunit	0.1637	0.0996	0.4237	-0.0885	0.2671	-0.3476	-0.6114	0	0	0	0	0	0	1	2	OnlyDuringLaterTimePoints
cce_1516		hypothetical protein	0.1158	-0.0263	0.2414	0.6478	0.0679	-0.2968	0.3588	0	0	0	-1	0	0	0	2	OnlyDuringLaterTimePoints
cce_1523		unknown; contains a glyoxalase/bleomycin resistance protein/dioxygenase domain	0.0487	0.0831	0.3515	0.7665	-0.013	0.2173	-0.1246	0	0	0	-1	0	0	0	2	OnlyDuringLaterTimePoints
cce_1524		CHP02652-containing protein	0.1083	0.1742	0.4758	1.2259	0.1116	0.4718	0.1624	0	0	0	-1	0	0	0	2	OnlyDuringLaterTimePoints
cce_1539		hypothetical protein; contains an acid phosphatase/vanadium-dependent haloperoxidase domain	-0.4958	-0.0712	-0.0323	0.565	-0.0552	0.9032	0.5366	0	0	0	0	0	-1	0	2	OnlyDuringLaterTimePoints
cce_1540		hypothetical protein	-0.5377	-0.0084	0.1754	0.7635	-1.1219	0.41	0.923	0	0	0	-1	1	0	-1	2	OnlyDuringLaterTimePoints
cce_1544		hypothetical protein	0.3275	0.1093	-0.0885	-0.003	-0.7871	-0.3503	-0.1483	0	0	0	0	1	0	0	2	OnlyDuringLaterTimePoints
cce_1577		conserved hypothetical protein	-0.1986	-0.1783	0.3125	-0.2231	-0.9045	-0.7882	-0.4784	0	0	0	0	1	1	0	2	OnlyDuringLaterTimePoints
cce_1579		unknown; contains a fimbrial assembly domain	0.1098	0.2549	-0.0773	0.6683	-0.4046	-0.0973	-0.7467	0	0	0	-1	0	0	1	2	OnlyDuringLaterTimePoints
cce_1580		unknown	0.1195	0.2514	-0.3538	0.7095	-0.5978	-0.2543	-0.9733	0	0	0	-1	1	0	1	2	OnlyDuringLaterTimePoints
cce_1589		unknown; contains a transglutaminase-like domain	0.0427	0.0046	-0.1157	0.293	0.6441	0.0542	0.2496	0	0	0	0	-1	0	0	2	OnlyDuringLaterTimePoints
cce_1590		hypothetical protein	-0.4006	-0.1933	0.3555	1.0271	0.7942	-0.3054	0.4095	0	0	0	-1	-1	0	0	2	OnlyDuringLaterTimePoints
cce_1596		hypothetical protein; contains UPF0150	0.1676	0.1013	-0.089	-0.6695	-0.3004	-0.0648	-0.5627	0	0	0	1	0	0	0	2	OnlyDuringLaterTimePoints
cce_1597		hypothetical protein	-0.2199	-0.2172	0.1676	-0.2709	0.5184	0.0221	0.7804	0	0	0	0	0	0	-1	2	OnlyDuringLaterTimePoints
cce_1609		unknown; contains DUF608	-0.2831	0.1073	-0.0566	-0.4619	0.8828	0.1568	0.9135	0	0	0	0	-1	0	-1	2	OnlyDuringLaterTimePoints
cce_1616		hypothetical protein; contains a glycosyl transferase, family 39 domain	0.0507	0.1364	0.1781	0.6106	0.0806	0.381	0.1588	0	0	0	-1	0	0	0	2	OnlyDuringLaterTimePoints
cce_1622		conserved hypothetical protein	-0.0841	0.0771	0.0959	-0.0488	-0.6037	-0.031	-0.3651	0	0	0	0	1	0	0	2	OnlyDuringLaterTimePoints
cce_1634		conserved hypothetical protein	0.0117	-0.0796	-0.1128	0.0894	-0.2588	-0.2045	-0.6293	0	0	0	0	0	0	1	2	OnlyDuringLaterTimePoints
cce_1637		hypothetical protein	0.0994	0.1655	-0.1943	0.0298	-0.3879	-0.3069	-2.5318	0	0	0	0	0	0	1	2	OnlyDuringLaterTimePoints
cce_1675		unknown	0.4676	0.3527	-0.2783	0.2216	-2.3599	-0.2219	-4.3652	0	0	0	0	1	0	1	2	OnlyDuringLaterTimePoints
cce_1676		hypothetical protein	-0.112	-0.1244	0.0514	0.7655	0.2751	-0.1828	-0.1323	0	0	0	-1	0	0	0	2	OnlyDuringLaterTimePoints
cce_1677		conserved hypothetical protein	-0.0028	0.0322	-0.097	0.9836	0.7573	0.0576	0.0422	0	0	0	-1	-1	0	0	2	OnlyDuringLaterTimePoints
cce_1680		hypothetical protein; contains an Na+/H+ antiporter MnhB subunit-related protein domain	-0.206	0.0059	-0.1444	-0.265	-0.4313	-0.6304	-0.0731	0	0	0	0	0	1	0	2	OnlyDuringLaterTimePoints
cce_1683		conserved hypothetical protein	-0.1541	0.119	-0.0939	0.1507	0.1216	-1.5252	-0.1004	0	0	0	0	0	1	0	2	OnlyDuringLaterTimePoints
cce_1684		conserved hypothetical protein	-0.3705	0.3147	-0.4988	-0.1843	0.1766	-1.453	0.32	0	0	0	0	0	1	0	2	OnlyDuringLaterTimePoints
cce_1686		DUF67-containing protein	-0.0981	0.0894	-0.2992	-0.1131	-0.0338	-0.7303	0.0124	0	0	0	0	0	1	0	2	OnlyDuringLaterTimePoints
cce_1687		conserved hypothetical protein	-0.0712	0.1099	-0.2723	-0.1549	0.0069	-0.6199	0.0743	0	0	0	0	0	1	0	2	OnlyDuringLaterTimePoints
cce_1691		hypothetical protein	0.1621	0.2976	-0.5241	-0.3714	-0.8244	-0.0001	0.233	0	0	0	0	1	0	0	2	OnlyDuringLaterTimePoints
cce_1706		putative addiction module toxin, Txe/YoeB	0.2407	0.0641	0.0473	-0.054	0.0467	-0.137	-0.6536	0	0	0	0	0	0	1	2	OnlyDuringLaterTimePoints
cce_1709		hypothetical protein; contains an alpha/beta hydrolase fold-1 domain	-0.0044	-0.0726	-0.5798	0.1554	0.3171	0.5377	0.6805	0	0	0	0	0	0	-1	2	OnlyDuringLaterTimePoints
cce_1723		unknown	-0.2	0.0469	-0.0325	-0.2446	-1.8803	-0.7151	-2.1317	0	0	0	0	1	1	1	2	OnlyDuringLaterTimePoints
cce_1724		unknown	0.0408	0.1535	-0.0579	0.0546	0.4295	0.9762	0.7655	0	0	0	0	0	-1	-1	2	OnlyDuringLaterTimePoints
cce_1732		DUF1092-containing protein	-0.0455	-0.2008	-0.1577	-1.5407	0.3893	-0.5692	0.702	0	0	0	1	0	0	-1	2	OnlyDuringLaterTimePoints
cce_1733		DUF111-containing protein	-0.0209	0.0144	0.235	-1.2013	0.486	0.0623	0.7048	0	0	0	1	0	0	-1	2	OnlyDuringLaterTimePoints
cce_1736		unknown	0.2468	0.5304	-0.3562	0.4519	0.4018	0.7946	-0.6623	0	0	0	0	0	-1	1	2	OnlyDuringLaterTimePoints
cce_1738		unknown	-0.3248	-0.5411	-0.0027	0.4896	0.0695	0.7525	0.3191	0	0	0	0	0	-1	0	2	OnlyDuringLaterTimePoints
cce_1746		unknown	0.305	-0.0713	-0.3103	-0.2462	-0.7955	-0.105	-1.2232	0	0	0	0	1	0	1	2	OnlyDuringLaterTimePoints
cce_1749		hypothetical protein; contains a conserved TM helix domain	0.1128	0.4788	0.492	0.4308	-0.9717	0.3295	-1.3241	0	0	0	0	1	0	1	2	OnlyDuringLaterTimePoints
cce_1750		hypothetical protein	0.143	0.0337	-0.0869	-1.5644	0.8858	0.0477	0.102	0	0	0	1	-1	0	0	2	OnlyDuringLaterTimePoints
cce_1752		putative glycoside hydrolase, family 57	0.1891	0.0108	-0.3883	-1.1441	0.0418	-0.0599	-0.3133	0	0	0	1	0	0	0	2	OnlyDuringLaterTimePoints
cce_1756		hypothetical protein; contains TPR_1 tetratricopeptide repeat domains	-0.0016	0.0863	0.4686	2.3804	0.2221	0.0601	0.596	0	0	0	-1	0	0	-1	2	OnlyDuringLaterTimePoints
cce_1778		unknown	-0.2877	-0.4695	-0.2195	0.883	0.4613	0.2807	0.3765	0	0	0	-1	0	0	0	2	OnlyDuringLaterTimePoints
cce_1786		conserved hypothetical protein	-0.0443	-0.0341	0.0878	1.5437	1.883	0.0108	0.2085	0	0	0	-1	-1	0	0	2	OnlyDuringLaterTimePoints
cce_1791		unknown	0.0457	0.029	0.0066	0.3141	-1.4137	0.5169	-0.9677	0	0	0	0	1	0	1	2	OnlyDuringLaterTimePoints
cce_1800		putative Ribonuclease III	0.1439	0.0815	-0.2083	0.1918	-0.7605	0.1654	-1.2541	0	0	0	0	1	0	1	2	OnlyDuringLaterTimePoints
cce_1803		hypothetical protein; contains a polysaccharide export protein domain	-0.0629	-0.2465	0.3773	0.7069	-0.2655	0.3679	0.6858	0	0	0	-1	0	0	0	2	OnlyDuringLaterTimePoints
cce_1804		unknown	0.0451	0.013	-0.0471	0.2748	0.099	0.587	-0.0655	0	0	0	0	0	-1	0	2	OnlyDuringLaterTimePoints
cce_1805		hypothetical protein; contains DUF888	0.2325	0.305	0.1445	-0.5714	-1.0648	-0.7364	0.827	0	0	0	0	1	1	0	2	OnlyDuringLaterTimePoints
cce_1809		conserved hypothetical protein	0.1466	0.2777	0.1795	-0.3193	-1.4298	-0.1817	-1.1631	0	0	0	0	1	0	1	2	OnlyDuringLaterTimePoints
cce_1811		putative BolA-like protein	-0.0634	0.0869	-0.3201	-0.2549	0.6605	0.955	0.9703	0	0	0	0	-1	-1	-1	2	OnlyDuringLaterTimePoints
cce_1813		conserved hypothetical protein	0.0807	0.1065	0.0664	0.1249	0.3016	0.152	0.856	0	0	0	0	0	0	-1	2	OnlyDuringLaterTimePoints
cce_1821		putative HAD-superfamily hydrolase, subfamily IA	-0.3387	-0.8425	-0.4291	1.1962	0.0511	0.8164	0.9141	0	0	0	-1	0	-1	-1	2	OnlyDuringLaterTimePoints
cce_1827		hypothetical protein; contains an O-antigen polymerase domain	-0.328	0.0103	-0.0461	0.6984	0.3359	1.1597	0.7991	0	0	0	-1	0	-1	-1	2	OnlyDuringLaterTimePoints
cce_1838		hypothetical protein	0.2379	0.1034	-0.4083	-0.8461	-1.7689	-0.8301	-0.7841	0	0	0	1	1	1	1	2	OnlyDuringLaterTimePoints
cce_1842		DUF150-containing protein	-0.0039	0.2155	0.2172	0.1984	1.1228	0.6658	0.7237	0	0	0	0	-1	-1	-1	2	OnlyDuringLaterTimePoints
cce_1843		putative terpenoid synthase	0.374	-0.1473	-0.0777	0.8426	-0.4041	0.0639	0.5212	0	0	0	-1	0	0	0	2	OnlyDuringLaterTimePoints
cce_1845		hypothetical protein	-0.0591	0.0625	0.0801	1.0847	0.2778	0.4084	0.0806	0	0	0	-1	0	0	0	2	OnlyDuringLaterTimePoints
cce_1846		hypothetical protein	-0.1186	0.1018	0.4861	1.8929	0.5109	0.6006	0.8688	0	0	0	-1	0	-1	-1	2	OnlyDuringLaterTimePoints
cce_1849		NADH dehydrogenase subunit M; ndhM	0.0708	0.1166	-0.2372	-0.4286	-0.1987	0.4167	-0.9516	0	0	0	0	0	0	1	2	OnlyDuringLaterTimePoints
cce_1863		hypothetical protein	0.0729	0.2325	0.308	0.0001	0.2526	0.201	0.6465	0	0	0	0	0	0	-1	2	OnlyDuringLaterTimePoints
cce_1866		conserved hypothetical protein	0.3583	0.4576	0.5493	1.3996	1.2059	0.3156	1.3578	0	0	0	-1	-1	0	-1	2	OnlyDuringLaterTimePoints
cce_1867		hypothetical protein; contains a Phospholipid/glycerol acyltransferase domain	0.154	-0.6562	-1.0264	0.9377	0.4357	0.129	0.756	0	0	0	-1	0	0	-1	2	OnlyDuringLaterTimePoints
cce_1869		hypothetical protein	-0.0079	-0.2045	-0.6093	0.1709	0.1321	-0.6896	0.4226	0	0	0	0	0	1	0	2	OnlyDuringLaterTimePoints
cce_1880		unknown	0.3449	0.2308	-0.0325	0.7582	0.8149	0.3159	0.03	0	0	0	-1	-1	0	0	2	OnlyDuringLaterTimePoints
cce_1891		unknown	0.2695	0.5197	-0.2517	2.0715	-0.6211	-0.3272	-0.3865	0	0	0	-1	1	0	0	2	OnlyDuringLaterTimePoints
cce_1892		hypothetical protein	0.1906	0.1094	-0.3085	0.2833	-0.9144	-0.3689	-1.0236	0	0	0	0	1	0	1	2	OnlyDuringLaterTimePoints
cce_1913		hypothetical protein	0.1109	-0.1598	-0.124	-0.0877	0.4359	-0.2705	-0.718	0	0	0	0	0	0	1	2	OnlyDuringLaterTimePoints
cce_1918		hypothetical protein	-0.119	-0.0959	0.3688	0.1493	-0.1516	-0.5857	0.0892	0	0	0	0	0	1	0	2	OnlyDuringLaterTimePoints
cce_1922		unknown	-0.1526	-0.0702	0.4552	0.0939	0.3002	0.5916	0.2957	0	0	0	0	0	-1	0	2	OnlyDuringLaterTimePoints
cce_1931		hypothetical protein	0.0575	0.0375	-0.1391	-0.4147	-0.7925	-0.265	-2.5929	0	0	0	0	1	0	1	2	OnlyDuringLaterTimePoints
cce_1932		unknown	-0.0293	-0.0872	-0.147	-0.8808	-0.5781	-0.4703	-0.375	0	0	0	1	0	0	0	2	OnlyDuringLaterTimePoints
cce_1943		unknown	0.0798	0.3142	-0.1132	-0.7928	-0.1973	0.2475	0.9151	0	0	0	1	0	0	-1	2	OnlyDuringLaterTimePoints
cce_1947		unknown; contains DUF88	0.3912	0.5848	0.3885	1.3272	0.8953	0.6214	-0.2142	0	0	0	-1	-1	-1	0	2	OnlyDuringLaterTimePoints
cce_1948		unknown	0.2092	0.3495	0.4491	1.1793	0.5268	0.2601	-0.2355	0	0	0	-1	0	0	0	2	OnlyDuringLaterTimePoints
cce_1958		hypothetical protein; contains a YcfA domain	0.0493	-0.222	0.1328	0.0163	-0.1199	-0.6856	-0.1392	0	0	0	0	0	1	0	2	OnlyDuringLaterTimePoints
cce_1959		hypothetical protein; contains a plasmid stabilization system domain	0.2194	0.0322	0.0688	0.4783	0.7737	-0.4298	-0.4676	0	0	0	0	-1	0	0	2	OnlyDuringLaterTimePoints
cce_1960		unknown	0.2218	0.0927	0.3161	0.6874	0.8788	-0.5164	-0.2458	0	0	0	-1	-1	0	0	2	OnlyDuringLaterTimePoints
cce_1971		unknown	0.0432	0.0396	-0.0689	-0.6331	0.5095	0.1742	0.0507	0	0	0	1	0	0	0	2	OnlyDuringLaterTimePoints
cce_1972		protein involved in disulfide bond formation	-0.1104	0.0428	0.01	-0.6125	-0.1238	0.4485	0.2138	0	0	0	1	0	0	0	2	OnlyDuringLaterTimePoints
cce_1978		unknown	0.0589	-0.0612	0.4053	1.1287	0.4293	0.0718	0.3051	0	0	0	-1	0	0	0	2	OnlyDuringLaterTimePoints
cce_1980		hypothetical protein; contains a Rhodanese-like domain	-0.0478	0.0602	0.1867	0.0311	-0.1032	0.2224	-1.0629	0	0	0	0	0	0	1	2	OnlyDuringLaterTimePoints
cce_1988		conserved hypothetical protein	-0.265	0.0338	0.495	-0.2056	0.1933	0.5949	0.4945	0	0	0	0	0	-1	0	2	OnlyDuringLaterTimePoints
cce_1990		hypothetical protein	0.1092	0.0572	0.2652	0.7713	-1.7024	0.6632	-1.0149	0	0	0	-1	1	-1	1	2	OnlyDuringLaterTimePoints
cce_1991		hypothetical protein	0.3649	0.2509	0.016	-0.1551	-1.1053	-0.1102	-0.8654	0	0	0	0	1	0	1	2	OnlyDuringLaterTimePoints
cce_1993		hypothetical protein	0.1133	-0.0056	-0.1495	-0.2478	-1.3435	-0.2	-1.3384	0	0	0	0	1	0	1	2	OnlyDuringLaterTimePoints
cce_2002		hypothetical protein	0.0002	0.1756	0.2178	0.332	-0.0188	0.7641	0.309	0	0	0	0	0	-1	0	2	OnlyDuringLaterTimePoints
cce_2005		hypothetical protein	0.1904	-0.0584	0.0292	-0.1734	-0.4469	-0.1558	-1.6516	0	0	0	0	0	0	1	2	OnlyDuringLaterTimePoints
cce_2008		hypothetical protein	0.1129	0.0703	-0.0428	-0.1965	-1.5023	-0.3408	-1.1656	0	0	0	0	1	0	1	2	OnlyDuringLaterTimePoints
cce_2009		unknown; contains a beta-lactamase-like domain	-0.0677	-0.2004	-0.286	-0.6427	0.2566	-0.2959	-0.4096	0	0	0	1	0	0	0	2	OnlyDuringLaterTimePoints
cce_2011		hypothetical protein; contains a Cupin, RmlC-type domain	0.0863	-0.0679	-0.3839	0.2943	-0.9899	0.2065	-0.6564	0	0	0	0	1	0	1	2	OnlyDuringLaterTimePoints
cce_2022		hypothetical protein	0.0228	0.0126	0.118	-0.4002	-0.5657	-0.3285	-0.6377	0	0	0	0	0	0	1	2	OnlyDuringLaterTimePoints
cce_2027		putative permease YjgP/YjgQ	0.0759	-0.0773	-0.2841	0.9976	-0.1082	0.6752	0.0658	0	0	0	-1	0	-1	0	2	OnlyDuringLaterTimePoints
cce_2029		unknown; contains an OstA-like protein domain	-0.0061	-0.3391	-0.3811	1.1631	-0.2973	-0.1581	0.3251	0	0	0	-1	0	0	0	2	OnlyDuringLaterTimePoints
cce_2039		putative six-hairpin glycosidase familly protein	-0.0794	-0.0182	-0.0334	-0.1754	0.7775	-0.0269	0.7675	0	0	0	0	-1	0	-1	2	OnlyDuringLaterTimePoints
cce_2041		hypothetical protein; contains DUF81	-0.097	-0.2367	0.0649	-0.0849	0.467	0.1995	0.6058	0	0	0	0	0	0	-1	2	OnlyDuringLaterTimePoints
cce_2052		DUF1517-containing protein	0.2044	0.1641	-0.116	0.6407	-0.427	0.3534	-1.0855	0	0	0	-1	0	0	1	2	OnlyDuringLaterTimePoints
cce_2057		unknown	0.1426	0.0034	-0.0264	0.7323	-0.5938	0.0481	-0.4884	0	0	0	0	1	0	0	2	OnlyDuringLaterTimePoints
cce_2060		unknown	0.0158	0.0936	0.193	-0.326	-0.8608	-0.2174	-0.949	0	0	0	0	1	0	1	2	OnlyDuringLaterTimePoints
cce_2063		putative phosphatidate cytidylyltransferase	0.1711	0.2466	0.0773	0.6027	-0.4569	0.4309	-0.1409	0	0	0	-1	0	0	0	2	OnlyDuringLaterTimePoints
cce_2070		unknown	0.2953	0.2323	0.116	-2.8336	-3.9599	-0.6652	-5.1028	0	0	0	1	1	1	1	2	OnlyDuringLaterTimePoints
cce_2071		hypothetical protein	0.1449	-0.0173	-0.254	-2.1129	-5.9254	-0.153	-6.113	0	0	0	1	1	0	1	2	OnlyDuringLaterTimePoints
cce_2072		unknown	0.4209	0.0128	-0.3194	-1.7397	-5.2156	-0.3847	-5.8211	0	0	0	1	1	0	1	2	OnlyDuringLaterTimePoints
cce_2073		unknown	0.2465	-0.0363	0.0093	-0.9681	-3.2239	-0.4056	-4.0476	0	0	0	1	1	0	1	2	OnlyDuringLaterTimePoints
cce_2074		hypothetical protein	0.0316	-0.0784	0.0861	-0.5828	-2.2746	-0.3478	-2.4829	0	0	0	0	1	0	1	2	OnlyDuringLaterTimePoints
cce_2075		putative 5-oxoprolinase (ATP-hydrolyzing)	0.0142	0.0774	0.2997	-0.4908	-1.9107	0.0777	-1.7237	0	0	0	0	1	0	1	2	OnlyDuringLaterTimePoints
cce_2080		unknown	0.1719	0.0214	-0.1765	-0.6706	-0.1506	-0.2116	-0.5739	0	0	0	1	0	0	0	2	OnlyDuringLaterTimePoints
cce_2081		hypothetical protein	0.3202	0.052	-0.4659	-1.0003	-0.671	-0.2527	-1.1855	0	0	0	1	1	0	1	2	OnlyDuringLaterTimePoints
cce_2085		unknown; contains an FMN-binding split barrel-related domain	-0.2884	0.2466	0.7058	1.2003	0.9489	0.2867	0.0972	0	0	0	-1	-1	0	0	2	OnlyDuringLaterTimePoints
cce_2086		hypothetical protein	-0.2696	0.176	0.5915	0.5799	0.3534	0.2457	0.8823	0	0	0	0	0	0	-1	2	OnlyDuringLaterTimePoints
cce_2089		hypothetical protein; contains a serralysin-like metalloprotease, C-terminal and PKD domains	0.0402	-0.1747	-0.074	-0.1279	-1.1764	-0.6938	-0.8666	0	0	0	0	1	1	1	2	OnlyDuringLaterTimePoints
cce_2094		hypothetical protein; contains a Methyltransferase type 11 domain	0.0747	-0.0725	0.3671	-0.4744	0.8668	0.1351	0.2224	0	0	0	0	-1	0	0	2	OnlyDuringLaterTimePoints
cce_2098		unknown	-0.1879	-0.2155	0.2456	-0.6868	-0.3599	-0.4998	-0.1616	0	0	0	1	0	0	0	2	OnlyDuringLaterTimePoints
cce_2103		rfrA family pentapeptide repeat	0.0038	-0.2136	0.0501	-1.3705	0.672	-0.0805	0.9576	0	0	0	1	-1	0	-1	2	OnlyDuringLaterTimePoints
cce_2114		hypothetical protein; contains DUF1622	0.104	0.0723	-0.0246	0.2444	-0.4604	0.2088	-0.9207	0	0	0	0	0	0	1	2	OnlyDuringLaterTimePoints
cce_2123		hypothetical protein; contains a Methyltransferase type 11 domain	0.1766	-0.0134	-0.1306	-0.7876	1.3296	0.5114	0.9248	0	0	0	1	-1	0	-1	2	OnlyDuringLaterTimePoints
cce_2125		conserved hypothetical protein	-0.0519	0.1763	0.1583	-0.6232	-0.0695	-0.1076	0.7521	0	0	0	0	0	0	-1	2	OnlyDuringLaterTimePoints
cce_2136		hypothetical protein; contains DUF955	-0.2605	-0.1763	0.2647	-0.2988	-0.4394	-0.5886	0.288	0	0	0	0	0	1	0	2	OnlyDuringLaterTimePoints
cce_2138		unknown; contains a proto-chlorophyllide reductase 57 kD subunit	-0.0922	-0.277	-0.2483	-1.0665	0.1005	-0.3281	-0.0442	0	0	0	1	0	0	0	2	OnlyDuringLaterTimePoints
cce_2149		unknown; contains DUF820	-0.0373	-0.1247	0.0611	0.0203	0.614	0.0949	0.234	0	0	0	0	-1	0	0	2	OnlyDuringLaterTimePoints
cce_2159		hypothetical protein	0.0543	0.005	0.023	0.603	0.2585	0.1911	0.2017	0	0	0	-1	0	0	0	2	OnlyDuringLaterTimePoints
cce_2160		hypothetical protein	0.2115	-0.0455	-0.1314	-0.7467	-0.8341	-0.3701	-0.5295	0	0	0	0	1	0	0	2	OnlyDuringLaterTimePoints
cce_2178		hypothetical protein; contains a YcfA domain	0.0874	-0.1216	0.0112	-0.1779	-0.2488	0.0536	-0.9188	0	0	0	0	0	0	1	2	OnlyDuringLaterTimePoints
cce_2179		hypothetical protein; contains UPF0150	0.0115	-0.0705	0.0115	-0.075	-0.4596	-0.083	-0.7176	0	0	0	0	0	0	1	2	OnlyDuringLaterTimePoints
cce_2181		hypothetical protein	-0.0799	-0.0686	0.1812	-0.0053	-0.8412	-0.3689	-0.4318	0	0	0	0	1	0	0	2	OnlyDuringLaterTimePoints
cce_2182		hypothetical protein	-0.1623	-0.0192	0.2327	-0.1791	-1.2668	-0.452	-0.6249	0	0	0	0	1	0	1	2	OnlyDuringLaterTimePoints
cce_2197		hypothetical protein	0.2806	0.0182	-0.361	0.0198	-0.7831	-0.0264	-1.4542	0	0	0	0	1	0	1	2	OnlyDuringLaterTimePoints
cce_2199		conserved hypothetical protein	-0.0535	-0.0438	-0.1071	-0.2262	-0.054	0.2996	0.7761	0	0	0	0	0	0	-1	2	OnlyDuringLaterTimePoints
cce_2203		rfrA family pentapeptide repeat	0.1124	-0.4483	0.2417	0.0406	-0.956	0.3433	-0.9383	0	0	0	0	1	0	1	2	OnlyDuringLaterTimePoints
cce_2208		hypothetical protein; contains an FMN-binding split barrel-related domain	0.0414	-0.0099	-0.4574	-0.3723	-0.5817	-0.2807	-1.452	0	0	0	0	0	0	1	2	OnlyDuringLaterTimePoints
cce_2209		hypothetical protein; contains a peptidase M20 domain	0.0253	-0.1591	-0.3878	-0.702	-0.9977	-0.4007	-2.0739	0	0	0	1	1	0	1	2	OnlyDuringLaterTimePoints
cce_2210		unknown	0.1172	-0.0924	-0.3912	-0.7963	-1.8606	-0.1489	-2.8705	0	0	0	1	1	0	1	2	OnlyDuringLaterTimePoints
cce_2238		putative ATP-dependent Clp protease, adaptor protein; clpS1	0.1933	0.3795	-0.3472	0.6278	-1.2108	0.2935	0.0918	0	0	0	-1	1	0	0	2	OnlyDuringLaterTimePoints
cce_2239		hypothetical protein; contains an abortive infection protein domain	0.0865	0.0958	-0.0859	0.2652	-0.6612	0.2744	0.1194	0	0	0	0	1	0	0	2	OnlyDuringLaterTimePoints
cce_2250		unknown	0.0716	0.1027	0.0145	-0.7066	0.1515	-0.309	0.4538	0	0	0	1	0	0	0	2	OnlyDuringLaterTimePoints
cce_2288		unknown; contains TPR_1 tetratricopeptide repeat domains	-0.0894	0.0855	-0.2838	-1.5963	-0.189	-0.2221	0.0155	0	0	0	1	0	0	0	2	OnlyDuringLaterTimePoints
cce_2299		conserved hypothetical protein	0.1705	0.0047	-0.2879	0.3741	0.2581	0.7228	-0.2288	0	0	0	0	0	-1	0	2	OnlyDuringLaterTimePoints
cce_2303		hypothetical protein	-0.0818	-0.1331	0.25	-0.0129	-0.1034	-1.1857	-0.1131	0	0	0	0	0	1	0	2	OnlyDuringLaterTimePoints
cce_2306		unknown	-0.4487	-0.4297	0.3666	-0.3145	0.1687	0.1674	1.4144	0	0	0	0	0	0	-1	2	OnlyDuringLaterTimePoints
cce_2307		unknown; contains a plasmid stabilization system domain	-0.0653	0.0242	0.3637	-1.2863	-0.0205	-0.2632	0.5967	0	0	0	1	0	0	-1	2	OnlyDuringLaterTimePoints
cce_2309		unknown	0.0549	0.1468	0.2513	-0.6658	0.6275	0.4545	0.4805	0	0	0	1	-1	0	0	2	OnlyDuringLaterTimePoints
cce_2312		4-hydroxy-3-methylbut-2-en-1-yl diphosphate synthase; ispG	0.0347	0.2891	-0.0968	-0.8	0.8246	0.6569	0.7212	0	0	0	1	-1	-1	0	2	OnlyDuringLaterTimePoints
cce_2313		hypothetical protein	-0.0002	-0.0404	-0.0151	0.7847	1.6719	-0.067	-0.3278	0	0	0	-1	-1	0	0	2	OnlyDuringLaterTimePoints
cce_2341		DUF151-containing protein	0.2586	0.0269	-0.4298	-0.9057	0.1997	-0.1268	-0.7751	0	0	0	1	0	0	1	2	OnlyDuringLaterTimePoints
cce_2343		hypothetical protein	0.454	0.1555	-0.3506	-0.6367	-0.1899	-0.6375	-1.7141	0	0	0	1	0	1	1	2	OnlyDuringLaterTimePoints
cce_2344		hypothetical protein	0.0692	-0.4459	-0.2069	-0.4574	1.1277	0.5176	0.1134	0	0	0	0	-1	0	0	2	OnlyDuringLaterTimePoints
cce_2345		unknown; contains a Cupin, RmlC-type domain	-0.3245	0.1455	0.0226	-0.4116	-0.7039	-0.475	-0.599	0	0	0	0	1	0	1	2	OnlyDuringLaterTimePoints
cce_2346		unknown	-0.263	-0.1847	0.1501	-1.0574	0.0221	-0.8517	0.5051	0	0	0	1	0	1	0	2	OnlyDuringLaterTimePoints
cce_2348		hypothetical protein	-0.1076	0.1364	0.0921	0.7042	0.7508	0.2392	0.5603	0	0	0	-1	-1	0	0	2	OnlyDuringLaterTimePoints
cce_2349		unknown; contains a single-stranded nucleic acid binding R3H and AAA ATPase domain	0.4173	0.4304	0.0186	0.5083	-0.6243	0.5229	-0.9241	0	0	0	0	1	0	1	2	OnlyDuringLaterTimePoints
cce_2350		putative alpha-helical ferredoxin	0.4996	0.1958	-0.3644	0.5088	-0.9069	0.5758	-1.55	0	0	0	0	1	0	1	2	OnlyDuringLaterTimePoints
cce_2351		hypothetical protein	-0.0568	0.0456	0.0248	-0.0114	-0.8087	-0.327	-0.2556	0	0	0	0	1	0	0	2	OnlyDuringLaterTimePoints
cce_2353		unknown	0.1466	0.2642	-0.2535	-0.2379	0.0126	-0.6264	-0.3115	0	0	0	0	0	1	0	2	OnlyDuringLaterTimePoints
cce_2360		hypothetical protein; contains a Peptidase M23B and Peptidoglycan-binding domain	0.0757	0.0501	0.3153	-0.2605	0.5206	0.7713	0.551	0	0	0	0	0	-1	0	2	OnlyDuringLaterTimePoints
cce_2367		hypothetical protein	-0.2855	-0.1078	0.4631	-0.6369	0.8278	0.1594	0.7966	0	0	0	1	0	0	-1	2	OnlyDuringLaterTimePoints
cce_2377		glyceraldehyde-3-phosphate dehydrogenase; nonfunctional due to frameshift	-0.1075	0.3873	-0.1191	-1.9377	-0.1641	-0.059	0.906	0	0	0	1	0	0	-1	2	OnlyDuringLaterTimePoints
cce_2388		unknown	-0.0164	0.3866	0.2054	-0.6154	-2.6472	-0.269	-2.5911	0	0	0	1	1	0	1	2	OnlyDuringLaterTimePoints
cce_2392		conserved hypothetical protein	0.1312	0.1558	0.0675	0.0323	-0.6873	0.0425	-0.3681	0	0	0	0	1	0	0	2	OnlyDuringLaterTimePoints
cce_2397		conserved hypothetical protein	0.1685	0.0036	0.3273	-0.5081	-0.3648	0.6992	-0.8976	0	0	0	0	0	-1	1	2	OnlyDuringLaterTimePoints
cce_2400		hypothetical protein	0.6879	0.6807	1.9459	1.4619	1.7553	2.5218	1.7342	0	0	0	0	-1	-1	0	2	OnlyDuringLaterTimePoints
cce_2408		unknown	-0.184	-0.0497	0.4261	0.2349	-0.3877	0.6337	-0.0956	0	0	0	0	0	-1	0	2	OnlyDuringLaterTimePoints
cce_2411		unknown; contains a UspA domain	-0.0576	-0.1481	-0.151	-0.6115	0.2243	-0.2616	0.2582	0	0	0	1	0	0	0	2	OnlyDuringLaterTimePoints
cce_2423		hypothetical protein	0.2229	0.4966	0.6408	1.7501	-0.4253	-0.3504	-0.9349	0	0	0	-1	0	0	1	2	OnlyDuringLaterTimePoints
cce_2426		unknown; contains ErfK/YbiS/YcfS/YnhG domains	0.2942	0.1157	0.0002	1.5195	1.2881	-0.3174	-0.0701	0	0	0	-1	-1	0	0	2	OnlyDuringLaterTimePoints
cce_2427		hypothetical protein; contains a Mo-dependent nitrogenase, C-terminal domain	0.0247	-0.2382	-0.2108	0.6596	-0.2632	0.3718	-0.9774	0	0	0	-1	0	0	1	2	OnlyDuringLaterTimePoints
cce_2432		hypothetical protein	-0.12	-0.1487	0.4706	0.6723	-0.1675	0.2931	-0.0213	0	0	0	-1	0	0	0	2	OnlyDuringLaterTimePoints
cce_2435		unknown; contains DUF323	0.3574	0.4153	-0.1099	-0.1116	0.0679	0.2134	0.8998	0	0	0	0	0	0	-1	2	OnlyDuringLaterTimePoints
cce_2443		hypothetical protein	-0.2248	0.0765	0.371	0.7784	0.0331	-0.1641	0.2947	0	0	0	-1	0	0	0	2	OnlyDuringLaterTimePoints
cce_2444		ThiamineS-like protein	-0.0125	0.2085	0.4495	-0.1448	1.9554	1.2373	2.4745	0	0	0	0	-1	-1	-1	2	OnlyDuringLaterTimePoints
cce_2449		unknown; contains a glycoside hydrolase, family 57 domain	0.1883	0.2877	-0.2009	-1.1156	1.5349	0.3557	1.4806	0	0	0	1	-1	0	-1	2	OnlyDuringLaterTimePoints
cce_2458		conserved hypothetical protein	-0.1369	0.1116	0.0337	-0.5988	0.1808	-0.0475	0.0338	0	0	0	1	0	0	0	2	OnlyDuringLaterTimePoints
cce_2471		putative adenine specific DNA methyltransferase	-0.0527	-0.1415	0.1222	-1.2711	0.6805	-0.2408	0.3887	0	0	0	1	-1	0	0	2	OnlyDuringLaterTimePoints
cce_2472		unknown; contains a beta-Ig-H3/fasciclin domain	0.0585	0.4179	-0.0859	-0.1709	-0.5838	0.0169	-1.6367	0	0	0	0	0	0	1	2	OnlyDuringLaterTimePoints
cce_2479		hypothetical protein; contains a NADPH-dependent FMN reductase domain	-0.0151	0.2245	0.1888	-0.0243	0.8399	0.4482	0.8559	0	0	0	0	-1	0	-1	2	OnlyDuringLaterTimePoints
cce_2490		conserved hypothetical protein	-0.0835	0.0246	-0.114	-0.4433	0.6829	0.0795	0.3633	0	0	0	0	-1	0	0	2	OnlyDuringLaterTimePoints
cce_2500		hypothetical protein; contains a radical SAM domain	0.229	-0.5175	-0.2227	1.4407	-0.5163	-0.3898	0.6976	0	0	0	-1	0	0	0	2	OnlyDuringLaterTimePoints
cce_2510		hypothetical protein	0.0542	0.0525	-0.1048	0.0809	-0.6092	-0.351	-0.28	0	0	0	0	1	0	0	2	OnlyDuringLaterTimePoints
cce_2511		hypothetical protein	0.1389	0.0242	-0.134	-0.1162	-1.2122	-0.0793	-1.5409	0	0	0	0	1	0	1	2	OnlyDuringLaterTimePoints
cce_2512		unknown; contains an aldo/keto reductase domain	0.0076	0.2178	0.032	-0.7825	-0.625	-0.5925	-0.4588	0	0	0	1	1	1	0	2	OnlyDuringLaterTimePoints
cce_2514		hypothetical protein	-0.0603	-0.1576	-0.0009	1.2422	0.5259	-0.2093	1.5672	0	0	0	-1	0	0	-1	2	OnlyDuringLaterTimePoints
cce_2524		unknown; contains a methyltransferase type 11 domain	0.256	0.0883	-0.0796	-0.9157	-0.1627	0.3394	-0.1539	0	0	0	1	0	0	0	2	OnlyDuringLaterTimePoints
cce_2528		unknown	-0.5062	-0.1161	0.337	-0.9288	-0.108	-0.6117	0.9207	0	0	0	1	0	1	-1	2	OnlyDuringLaterTimePoints
cce_2533		unknown; contains a phosphoglycerate mutase domain	-0.1035	-0.023	0.3107	0.0388	0.4097	-0.263	0.6515	0	0	0	0	0	0	-1	2	OnlyDuringLaterTimePoints
cce_2552		unknown; contains amidinotransferase and CHP300 domains	-0.1206	0.0415	0.3893	-0.5147	1.1757	0.1327	1.484	0	0	0	0	-1	0	-1	2	OnlyDuringLaterTimePoints
cce_2553		hypothetical protein	-0.1707	-0.0844	0.3501	-0.9945	0.8784	0.1584	0.8767	0	0	0	1	-1	0	-1	2	OnlyDuringLaterTimePoints
cce_2575		hypothetical protein	-0.3005	0.0709	-0.0771	0.2019	-2.3357	-1.1883	-3.48	0	0	0	0	1	1	1	2	OnlyDuringLaterTimePoints
cce_2576		hypothetical protein; contains DUF820	0.0461	0.1732	-0.0281	-0.1256	-1.1916	-0.4646	-1.7837	0	0	0	0	1	0	0	2	OnlyDuringLaterTimePoints
cce_2579		hypothetical protein	0.0223	0.1459	0.1819	-0.8036	-0.2262	-0.0809	0.3668	0	0	0	1	0	0	0	2	OnlyDuringLaterTimePoints
cce_2597		hypothetical protein	0.0124	0.2871	0.1193	-0.7461	0.3949	-0.2111	1.0619	0	0	0	1	0	0	-1	2	OnlyDuringLaterTimePoints
cce_2602		hypothetical protein	0.1601	0.1112	0.0168	0.3714	-1.259	-0.2587	-0.0818	0	0	0	0	1	0	0	2	OnlyDuringLaterTimePoints
cce_2604		hypothetical protein	0.1289	-0.538	-0.3005	-0.9935	-1.4286	-0.2745	-1.7917	0	0	0	1	1	0	1	2	OnlyDuringLaterTimePoints
cce_2611		hypothetical protein; contains PAS, GGDEF, Response regulator receiver, and GAF domains	-0.1525	0.2043	-0.1353	-0.3722	-1.6706	-0.811	-1.4196	0	0	0	0	1	1	1	2	OnlyDuringLaterTimePoints
cce_2617		unknown; contains DUF900, hydrolase-like	0.0406	0.0867	-0.2242	-1.2805	-0.5871	-0.2437	-0.7656	0	0	0	1	0	0	1	2	OnlyDuringLaterTimePoints
cce_2620		hypothetical protein	-0.3203	-0.087	0.4293	0.5393	-0.624	-0.5472	0.0435	0	0	0	0	1	0	0	2	OnlyDuringLaterTimePoints
cce_2637		putative nitrogen fixation related protein	-0.0728	-0.107	-0.0136	-0.7832	0.0514	-0.3085	-0.3675	0	0	0	1	0	0	0	2	OnlyDuringLaterTimePoints
cce_2639		unknown; contains a Rhodanese-like domain	-0.2379	0.3931	0.1138	0.7054	0.816	2.0566	1.0205	0	0	0	-1	0	-1	0	2	OnlyDuringLaterTimePoints
cce_2640		unknown	-0.0801	-0.0155	0.298	-0.6347	0.2146	-0.014	0.4216	0	0	0	1	0	0	0	2	OnlyDuringLaterTimePoints
cce_2641		hypothetical protein	-0.1751	-0.0923	0.1177	-0.1262	-0.2336	-0.611	0.3627	0	0	0	0	0	1	0	2	OnlyDuringLaterTimePoints
cce_2644		hypothetical protein	-0.0396	0.2311	0.2713	0.616	-0.6797	-0.2827	-1.7199	0	0	0	-1	1	0	1	2	OnlyDuringLaterTimePoints
cce_2663		hypothetical protein; contains a peptidase M23B domain	0.4396	-0.198	0.0382	0.4195	-0.5935	-0.3864	0.1599	0	0	0	0	1	0	0	2	OnlyDuringLaterTimePoints
cce_2666		putative biopterin transport-related protein BT1	0.1195	-0.4708	-0.1634	0.8744	-0.2236	0.3263	0.3304	0	0	0	-1	0	0	0	2	OnlyDuringLaterTimePoints
cce_2669		unknown; contains a mammalian cell entry related domain	0.0991	-0.1714	0.2867	1.5193	-0.0327	1.1623	0.4504	0	0	0	-1	0	-1	0	2	OnlyDuringLaterTimePoints
cce_2672		conserved hypothetical protein	-0.0414	-0.1917	-0.0355	-0.6237	0.2007	0.0518	0.2303	0	0	0	1	0	0	0	2	OnlyDuringLaterTimePoints
cce_2673		hypothetical protein	0.1692	0.175	0.0985	0.0128	-1.0024	-0.4606	-0.1581	0	0	0	0	1	0	0	2	OnlyDuringLaterTimePoints
cce_2676		hypothetical protein	0.0576	0.0482	0.1952	0.2771	-0.6508	-0.3728	-0.0161	0	0	0	0	1	0	0	2	OnlyDuringLaterTimePoints
cce_2684		putative PfkB	0.2218	-0.0929	-0.2528	-0.6351	-0.3153	-0.1612	-0.7525	0	0	0	1	0	0	1	2	OnlyDuringLaterTimePoints
cce_2689		unknown; contains a bacterial regulatory protein, MerR domain	-0.1146	0.0037	-0.5257	0.128	0.5518	-1.0011	0.522	0	0	0	0	0	1	0	2	OnlyDuringLaterTimePoints
cce_2692		unknown; contains a UspA domain	0.1834	-0.0424	-0.0974	-0.5382	-0.005	0.4359	-0.6411	0	0	0	0	0	0	1	2	OnlyDuringLaterTimePoints
cce_2694		unknown; contains a nucleic acid-binding, OB-fold domain	0.0411	0.091	-0.3544	-0.2177	-0.5943	0.0012	-1.1344	0	0	0	0	1	0	1	2	OnlyDuringLaterTimePoints
cce_2695		conserved hypothetical protein	-0.0291	0.0611	-0.183	-0.3513	-0.8287	-0.2336	-0.9606	0	0	0	0	1	0	1	2	OnlyDuringLaterTimePoints
cce_2699		unknown	-0.1984	-0.1221	-0.0012	-2.4962	0.055	-0.1134	-0.3128	0	0	0	1	0	0	0	2	OnlyDuringLaterTimePoints
cce_2701		unknown; contains a Lambda repressor-like, DNA-binding domain	0.0194	0.2335	0.0259	-1.3591	0.7648	0.1374	0.6158	0	0	0	1	-1	0	-1	2	OnlyDuringLaterTimePoints
cce_2702		unknown	0.0078	0.4025	-0.1437	0.35	1.3745	0.2957	0.4119	0	0	0	0	-1	0	0	2	OnlyDuringLaterTimePoints
cce_2709		hypothetical protein	0.2516	0.4412	0.1486	0.6018	-1.3014	0.2323	-2.006	0	0	0	-1	1	0	1	2	OnlyDuringLaterTimePoints
cce_2710		unknown	0.3325	0.4819	0.0564	0.5334	-0.9985	0.0502	-2.0724	0	0	0	0	1	0	1	2	OnlyDuringLaterTimePoints
cce_2711		unknown	0.5186	0.6804	-0.039	0.7939	-1.1184	-0.02	-2.2662	0	0	0	0	0	0	1	2	OnlyDuringLaterTimePoints
cce_2718		putative DoxX	-0.0064	-0.1538	-0.1912	0.3463	-0.8497	0.436	-0.0887	0	0	0	0	1	0	0	2	OnlyDuringLaterTimePoints
cce_2719		flavin oxidoreductase/NADH oxidase	0.0632	0.1663	0.0153	-0.1987	0.6438	0.5346	0.8576	0	0	0	0	0	0	-1	2	OnlyDuringLaterTimePoints
cce_2720		hypothetical protein	-0.0582	0.1162	0.1636	-0.2204	0.6544	0.2074	0.635	0	0	0	0	-1	0	-1	2	OnlyDuringLaterTimePoints
cce_2723		conserved hypothetical protein	0.0219	0.0958	0.0727	0.8608	0.7075	0.6943	0.6043	0	0	0	-1	-1	-1	-1	2	OnlyDuringLaterTimePoints
cce_2729		unknown	0.3607	0.3477	0.0619	1.2546	-0.625	0.811	-0.146	0	0	0	-1	1	-1	0	2	OnlyDuringLaterTimePoints
cce_2736		hypothetical protein	0.1003	-0.1192	-0.2926	0.2703	1.1592	0.334	0.9565	0	0	0	0	-1	0	-1	2	OnlyDuringLaterTimePoints
cce_2739		DUF427-containing protein	-0.1555	-0.1129	0.3487	-0.852	-0.1297	-0.2973	0.6329	0	0	0	1	0	0	0	2	OnlyDuringLaterTimePoints
cce_2741		unknown	0.177	0.1924	-0.1081	-0.3193	-2.1211	-0.3035	-1.9308	0	0	0	0	1	0	1	2	OnlyDuringLaterTimePoints
cce_2742		unknown; contains TPR_1 tetratricopeptide repeat domains	-0.189	-0.1652	0.3468	0.6226	-0.6409	0.3974	0.0863	0	0	0	-1	1	0	0	2	OnlyDuringLaterTimePoints
cce_2753		hypothetical protein; contains DUF820	-0.3501	-0.3403	0.0974	-0.2766	-0.7893	-0.603	-0.5155	0	0	0	0	1	1	0	2	OnlyDuringLaterTimePoints
cce_2757		putative NUDIX hydrolase	-0.025	0.0019	-0.037	-0.0184	-0.647	0.0927	-0.409	0	0	0	0	1	0	0	2	OnlyDuringLaterTimePoints
cce_2759		putative nicotinate phosphoribosyltransferase	-0.1715	-0.1864	-0.1693	0.0107	-1.0495	-0.3852	-0.8206	0	0	0	0	1	0	1	2	OnlyDuringLaterTimePoints
cce_2760		unknown; contains a von Willebrand factor, type A domain	-0.216	0.194	0.1363	0.0765	-0.9137	-0.4651	-0.7784	0	0	0	0	1	0	1	2	OnlyDuringLaterTimePoints
cce_2767		unknown; contains a phytoene dehydrogenase-related protein domain	-0.0498	-0.0248	-0.17	-0.2091	-1.9717	-0.4494	-2.4622	0	0	0	0	1	0	1	2	OnlyDuringLaterTimePoints
cce_2769		Pirin-like protein	0.1249	0.147	0.1678	0.2769	0.901	0.3753	0.5107	0	0	0	0	-1	0	0	2	OnlyDuringLaterTimePoints
cce_2776		hypothetical protein	-0.145	0.367	-0.2506	-1.7112	-0.9359	-1.0063	0.7381	0	0	0	1	1	1	-1	2	OnlyDuringLaterTimePoints
cce_2780		hypothetical protein	-0.1844	-0.2473	0.0876	-0.4651	0.5124	-0.7302	0.5722	0	0	0	0	0	1	0	2	OnlyDuringLaterTimePoints
cce_2793		hypothetical protein; contains UPF0016	-0.198	-0.1656	0.4117	-0.8068	0.1844	-1.0066	0.1316	0	0	0	1	0	1	0	2	OnlyDuringLaterTimePoints
cce_2798		conserved hypothetical protein	-0.1231	-0.4142	-0.5075	0.9626	0.5775	0.4958	1.0083	0	0	0	-1	0	0	-1	2	OnlyDuringLaterTimePoints
cce_2805		hypothetical protein	-0.4291	-0.3836	0.2135	0.0562	-0.1326	-0.7421	0.0147	0	0	0	0	0	1	0	2	OnlyDuringLaterTimePoints
cce_2809		hypothetical protein; contains a cyclic nucleotide-binding domain and a winged helix repressor DNA-binding domain	0.0444	-0.0911	-0.2744	-0.5885	0.1938	-0.2	0.5255	0	0	0	1	0	0	0	2	OnlyDuringLaterTimePoints
cce_2810		tRNA-i(6)A37 modification enzyme MiaB; miaB	-0.2359	-0.0451	0.4176	0.3017	-0.2076	0.6894	-0.3057	0	0	0	0	0	-1	0	2	OnlyDuringLaterTimePoints
cce_2814		conserved hypothetical protein	-0.1055	0.0175	-0.1874	0.581	-0.2878	0.4271	-0.6448	0	0	0	0	0	0	1	2	OnlyDuringLaterTimePoints
cce_2816		unknown	0.1376	0.02	-0.111	-0.3188	-0.3225	-0.1687	-0.7474	0	0	0	0	0	0	1	2	OnlyDuringLaterTimePoints
cce_2817		hypothetical protein; contains an alpha/beta hydrolase fold-1	-0.0797	-0.4242	-0.1788	0.5081	0.635	0.8927	0.4573	0	0	0	0	-1	-1	0	2	OnlyDuringLaterTimePoints
cce_2820		hypothetical protein; contains a metallophosphoesterase domain	0.1336	0.0623	0.0511	0.6071	0.3796	-0.1588	-0.207	0	0	0	-1	0	0	0	2	OnlyDuringLaterTimePoints
cce_2825		unknown	0.0518	0.1626	0.2522	-0.6695	-0.0463	-0.4598	0.6108	0	0	0	1	0	0	-1	2	OnlyDuringLaterTimePoints
cce_2830		hypothetical protein	0.2048	-0.081	-0.3733	0.2317	-0.5337	-0.1901	-0.9696	0	0	0	0	0	0	1	2	OnlyDuringLaterTimePoints
cce_2831		hypothetical protein; contains DUF497	0.1507	-0.157	-0.4139	0.1585	-0.1391	-0.2152	-0.7352	0	0	0	0	0	0	1	2	OnlyDuringLaterTimePoints
cce_2832		DUF559-containing protein	0.0899	0.016	-0.3597	-0.157	-0.6234	-0.2794	-0.6585	0	0	0	0	1	0	1	2	OnlyDuringLaterTimePoints
cce_2837		hypothetical protein	0.0897	-0.1509	-0.4246	-0.2351	-0.4296	-0.3864	-0.7225	0	0	0	0	0	0	1	2	OnlyDuringLaterTimePoints
cce_2843		hypothetical protein	-0.09	-0.1054	0.3107	-0.4448	0.1451	-0.7209	-0.2017	0	0	0	0	0	1	0	2	OnlyDuringLaterTimePoints
cce_2849		hypothetical protein	0.0542	-0.1982	-0.2861	-0.3411	-1.1803	-0.4755	-2.2039	0	0	0	0	1	0	1	2	OnlyDuringLaterTimePoints
cce_2850		hypothetical protein	0.1227	-0.3055	-0.2886	-0.6727	-1.6248	-0.9234	-2.5149	0	0	0	1	1	1	1	2	OnlyDuringLaterTimePoints
cce_2851		hypothetical protein; contains a Ribbon-helix-helix domain	0.0676	-0.0946	-0.0677	-0.4307	-1.3409	-0.7736	-1.947	0	0	0	0	1	1	1	2	OnlyDuringLaterTimePoints
cce_2856		hypothetical protein	-0.1394	-0.3072	0.0716	-0.1241	0.1523	-0.6513	-0.0782	0	0	0	0	0	1	0	2	OnlyDuringLaterTimePoints
cce_2857		hypothetical protein	-0.0858	-0.2991	0.1663	-0.0189	0.3094	-0.603	-0.1796	0	0	0	0	0	1	0	2	OnlyDuringLaterTimePoints
cce_2867		unknown	-0.0044	-0.0174	-0.0186	0.6049	-0.1225	-0.2027	0.0055	0	0	0	-1	0	0	0	2	OnlyDuringLaterTimePoints
cce_2885		hypothetical protein; contains a Mechanosensitive ion channel, MscS domain	-0.2351	-0.1569	0.2023	0.5279	0.1212	0.8839	0.4002	0	0	0	0	0	-1	0	2	OnlyDuringLaterTimePoints
cce_2886		unknown	-0.2989	-0.2422	0.3119	0.8613	-0.0804	1.0066	0.8586	0	0	0	0	0	-1	0	2	OnlyDuringLaterTimePoints
cce_2890		conserved hypothetical protein	0.2749	0.3325	-0.112	0.5612	0.1952	0.8201	0.1126	0	0	0	0	0	-1	0	2	OnlyDuringLaterTimePoints
cce_2897		unknown; contains a soluble quinoprotein glucose dehydrogenase domain	0.1521	0.1469	0.0788	0.6378	0.2193	-0.0419	0.0274	0	0	0	-1	0	0	0	2	OnlyDuringLaterTimePoints
cce_2915		unknown; contains DUF552	-0.4305	-0.212	0.1426	1.0789	0.7061	-0.7822	0.3195	0	0	0	-1	-1	1	0	2	OnlyDuringLaterTimePoints
cce_2931		conserved hypothetical protein	0.1453	0.0944	0.395	0.2199	-0.9228	-0.2755	-0.7066	0	0	0	0	1	0	1	2	OnlyDuringLaterTimePoints
cce_2932		putative galactose-1-phosphate uridyl transferase, class I	-0.2071	-0.1024	-0.0782	0.6079	0.1599	-0.2605	0.2195	0	0	0	-1	0	0	0	2	OnlyDuringLaterTimePoints
cce_2933		conserved hypothetical protein	-0.1409	0.0808	0.2263	0.8484	0.0933	-0.1257	0.1633	0	0	0	-1	0	0	0	2	OnlyDuringLaterTimePoints
cce_2941		hypothetical protein; contains DUF1499	-0.0549	-0.1289	0.1828	-0.0617	1.0032	1.5072	0.9886	0	0	0	0	-1	-1	-1	2	OnlyDuringLaterTimePoints
cce_2942		unknown	0.3476	0.3837	0.2909	0.8406	-1.0743	0.6241	-0.3687	0	0	0	0	1	0	0	2	OnlyDuringLaterTimePoints
cce_2947		unknown; contains a GCN5-related N-acetyltransferase domain	0.1527	-0.127	-0.219	-1.2356	0.0032	-0.371	0.7954	0	0	0	1	0	0	-1	2	OnlyDuringLaterTimePoints
cce_2948		conserved hypothetical protein	-0.15	-0.231	0.0619	-0.5052	-0.0807	-1.1086	0.6621	0	0	0	0	0	1	-1	2	OnlyDuringLaterTimePoints
cce_2950		conserved hypothetical protein	0.1172	0.3756	0.1101	0.1242	-0.79	-0.1195	-0.831	0	0	0	0	1	0	1	2	OnlyDuringLaterTimePoints
cce_2954		putative peptidase, S54 (Rhomboid) family	0.0787	0.2819	0.4537	-0.5897	0.3673	0.4694	0.7836	0	0	0	1	0	0	-1	2	OnlyDuringLaterTimePoints
cce_2960		hypothetical protein	0.1654	0.0483	-0.1597	-0.7465	0.5635	0.2558	0.7989	0	0	0	1	0	0	-1	2	OnlyDuringLaterTimePoints
cce_2971		putative polyphosphate kinase 2	0.0163	0.0704	0.4652	0.7273	0.5586	0.2516	0.7149	0	0	0	-1	0	0	-1	2	OnlyDuringLaterTimePoints
cce_2974		hypothetical protein	0.0988	-0.0984	-0.3358	0.2016	-0.2097	-0.3047	-1.0947	0	0	0	0	0	0	1	2	OnlyDuringLaterTimePoints
cce_2989		hypothetical protein; contains DUF214	-0.1731	-0.0658	0.574	0.3828	0.0147	0.9846	0.4463	0	0	0	0	0	-1	0	2	OnlyDuringLaterTimePoints
cce_2996		unknown	-0.1106	0.3418	0.0867	0.8174	0.2966	0.321	-0.1395	0	0	0	-1	0	0	0	2	OnlyDuringLaterTimePoints
cce_2997		conserved hypothetical protein	-0.1675	0.3347	0.1635	0.6234	-0.2117	0.6496	-0.578	0	0	0	0	0	-1	0	2	OnlyDuringLaterTimePoints
cce_3007		hypothetical protein	0.2128	0.3497	-0.3104	0.8549	0.088	0.098	0.0742	0	0	0	-1	0	0	0	2	OnlyDuringLaterTimePoints
cce_3029		unknown	0.3714	0.2465	-0.0132	-0.3683	-0.1205	0.5263	0.5862	0	0	0	0	0	0	-1	2	OnlyDuringLaterTimePoints
cce_3032		hypothetical protein	-0.3023	-0.1656	-0.0333	-0.3991	-0.7754	-1.2618	0.2658	0	0	0	0	1	1	0	2	OnlyDuringLaterTimePoints
cce_3035		hypothetical protein; contains a VCBS repeat	-0.126	-0.2503	0.0381	0.0983	-1.2582	-1.202	-0.5932	0	0	0	0	1	1	1	2	OnlyDuringLaterTimePoints
cce_3047		putative MbtH-like protein	0.02	0.0535	-0.2619	-0.6318	-0.2832	-0.7856	-0.2769	0	0	0	1	0	1	0	2	OnlyDuringLaterTimePoints
cce_3052		hypothetical protein; contains a TonB, C-terminal domain	0.0622	0.0554	-0.0157	0.1985	0.5995	-0.0917	-0.3758	0	0	0	0	-1	0	0	2	OnlyDuringLaterTimePoints
cce_3069		unknown	0.1646	0.0608	-0.3045	-0.7372	-0.5465	-0.8056	-0.3213	0	0	0	1	0	1	0	2	OnlyDuringLaterTimePoints
cce_3085		unknown; contains a glyoxalase/bleomycin resistance protein/dioxygenase domain	-0.206	-0.6876	-0.4198	0.615	-0.5869	0.3162	0.1518	0	0	0	-1	1	0	0	2	OnlyDuringLaterTimePoints
cce_3087		hypothetical protein	0.3531	0.1413	-0.2268	-0.425	-5.2535	-2.4971	0.4055	0	0	0	0	1	1	0	2	OnlyDuringLaterTimePoints
cce_3088		hypothetical protein	0.2194	0.0799	-0.3504	-0.4199	-5.1576	-2.3987	0.0276	0	0	0	0	1	1	0	2	OnlyDuringLaterTimePoints
cce_3089		unknown	0.1155	0.3606	-0.0113	-0.9325	-0.207	0.821	0.5213	0	0	0	1	0	-1	0	2	OnlyDuringLaterTimePoints
cce_3095		conserved hypothetical protein	0.1418	0.2533	0.427	0.7129	0.517	0.4587	-0.1404	0	0	0	-1	0	0	0	2	OnlyDuringLaterTimePoints
cce_3097		hypothetical protein	0.0174	0.0769	0.3731	0.2587	0.6786	0.0715	0.3212	0	0	0	0	-1	0	0	2	OnlyDuringLaterTimePoints
cce_3098		DUF938-containing protein	0.0406	0.1493	0.537	0.3341	1.1861	0.351	0.5692	0	0	0	0	-1	0	0	2	OnlyDuringLaterTimePoints
cce_3102		rfrA family pentapeptide repeat	0.4144	0.3851	0.3198	0.1522	1.0396	0.4803	-0.0964	0	0	0	0	-1	0	0	2	OnlyDuringLaterTimePoints
cce_3108		unknown	0.1808	-0.0407	-0.0396	-0.1983	-1.4738	-0.5346	-1.4468	0	0	0	0	0	0	1	2	OnlyDuringLaterTimePoints
cce_3109		unknown	0.1519	-0.0645	0.1147	0.5521	-0.9764	-0.3732	-0.9517	0	0	0	0	1	0	1	2	OnlyDuringLaterTimePoints
cce_3110		hypothetical protein; contains DUF683	-0.0421	-0.1426	0.1231	0.4019	-0.7705	0.0344	-0.3285	0	0	0	0	1	0	0	2	OnlyDuringLaterTimePoints
cce_3129		conserved hypothetical protein	0.4415	0.5654	0	0.436	-0.6259	-0.2775	0.4858	0	0	0	0	1	0	0	2	OnlyDuringLaterTimePoints
cce_3138		hypothetical protein	0.0337	0.0188	0.2493	-0.8428	-0.3071	-0.3452	0.2834	0	0	0	1	0	0	0	2	OnlyDuringLaterTimePoints
cce_3139		unknown; contains a glycosyl transferase, family 2 and Tetratricopeptide TPR_1 domains	-0.0262	-0.5423	-0.1005	0.9033	0.1982	0.365	0.3641	0	0	0	-1	0	0	0	2	OnlyDuringLaterTimePoints
cce_3141		unknown	0.1535	0.3983	0.5607	1.3794	-0.1968	0.3481	0.3644	0	0	0	-1	0	0	0	2	OnlyDuringLaterTimePoints
cce_3149		unknown	-0.0817	-0.1293	-0.0143	-1.5011	0.2875	-0.2204	0.5466	0	0	0	1	0	0	0	2	OnlyDuringLaterTimePoints
cce_3161		hypothetical protein	-0.1365	0.1577	0.1219	-0.2732	-0.9799	-0.7856	-0.5219	0	0	0	0	1	1	0	2	OnlyDuringLaterTimePoints
cce_3162		hypothetical protein; contains a bacterial regulatory protein, MerR domain	-0.2185	-0.2438	0.1387	-0.0588	-0.7949	-1.3308	-0.5399	0	0	0	0	1	1	0	2	OnlyDuringLaterTimePoints
cce_3175		hypothetical protein	0.333	-0.0265	-0.5961	-0.3862	-1.1397	-0.9151	-0.5333	0	0	0	0	1	1	0	2	OnlyDuringLaterTimePoints
cce_3182		hypothetical protein	0.0006	0.0845	0.0049	-0.1748	0.6876	0.1622	0.7474	0	0	0	0	-1	0	-1	2	OnlyDuringLaterTimePoints
cce_3183		unknown	-0.0336	0.0273	-0.1422	0.0699	0.7285	0.1656	0.3579	0	0	0	0	-1	0	0	2	OnlyDuringLaterTimePoints
cce_3185		unknown; contains glutathione S-transferase, C-terminal-like and Thioredoxin-like fold domains	-0.206	-0.1857	0.2058	-0.36	0.373	0.0837	0.7246	0	0	0	0	0	0	-1	2	OnlyDuringLaterTimePoints
cce_3206		hypothetical protein; contains a CpcD phycobilisome linker-like domain	0.0566	0.3543	-0.0199	-0.7098	-0.3133	-0.3798	0.066	0	0	0	1	0	0	0	2	OnlyDuringLaterTimePoints
cce_3225		conserved hypothetical protein	0.5403	0.3506	0.4552	0.399	-0.1097	1.1324	-0.3673	0	0	0	0	0	-1	0	2	OnlyDuringLaterTimePoints
cce_3226		conserved hypothetical protein	0.4431	0.2054	-0.1435	-0.0949	-0.5456	0.7137	-0.961	0	0	0	0	0	-1	1	2	OnlyDuringLaterTimePoints
cce_3227		unknown; contains a cobalamin (vitamin B12) biosynthesis domain, cobW domain	0.2186	0.1338	-0.0325	0.1522	-0.0064	0.5202	-0.735	0	0	0	0	0	0	1	2	OnlyDuringLaterTimePoints
cce_3238		hypothetical protein	0.0289	0.0934	0.2588	-0.2297	-0.0503	0.6583	0.4318	0	0	0	0	0	-1	0	2	OnlyDuringLaterTimePoints
cce_3240		hypothetical protein; contains an abortive infection protein domain	0.0637	-0.1024	-0.1404	-0.4342	-0.6611	-0.5771	-0.2212	0	0	0	0	1	0	0	2	OnlyDuringLaterTimePoints
cce_3241		hypothetical protein	-0.0056	-0.0129	0.1384	-0.9222	-0.0236	-0.4964	-0.2228	0	0	0	1	0	0	0	2	OnlyDuringLaterTimePoints
cce_3242		unknown; contains a transcriptional regulator AbrB domain	0.1734	-0.0314	0.2895	-0.6121	0.0082	-0.0436	0.2835	0	0	0	1	0	0	0	2	OnlyDuringLaterTimePoints
cce_3252		putative dihydroorotate oxidase	-0.0667	0.2475	0.4806	0.4418	-0.6412	-0.2877	-0.5651	0	0	0	0	1	0	0	2	OnlyDuringLaterTimePoints
cce_3262		hypothetical protein	0.1822	0.2926	-0.0178	0.7215	0.1343	-0.0347	0.0236	0	0	0	-1	0	0	0	2	OnlyDuringLaterTimePoints
cce_3263		unknown	0.0161	0.0484	-0.1992	-0.1842	0.8414	-0.1496	-0.1783	0	0	0	0	-1	0	0	2	OnlyDuringLaterTimePoints
cce_3270		hypothetical protein	-0.14	-0.1916	0.3905	-0.0497	-0.6506	-0.8514	-0.673	0	0	0	0	1	1	1	2	OnlyDuringLaterTimePoints
cce_3271		unknown	0.0352	0.0645	0.4826	0.7759	0.2979	-0.3899	-0.1281	0	0	0	-1	0	0	0	2	OnlyDuringLaterTimePoints
cce_3273		hypothetical protein	0.1032	0.5316	-0.2346	-0.1879	-2.9172	-1.4578	-3.3296	0	0	0	0	1	1	1	2	OnlyDuringLaterTimePoints
cce_3274		hypothetical protein	0.1283	0.298	-0.1311	-0.2451	-3.097	-1.3165	-3.5165	0	0	0	0	1	1	1	2	OnlyDuringLaterTimePoints
cce_3276		unknown	0.1185	0.1337	0.0465	-0.0794	0.5534	0.9997	-0.3272	0	0	0	0	0	-1	0	2	OnlyDuringLaterTimePoints
cce_3281		hypothetical protein	-0.066	0.0691	0.3408	1.0158	0.6238	0.0868	0.5037	0	0	0	-1	0	0	0	2	OnlyDuringLaterTimePoints
cce_3289		hypothetical protein	0.1224	0.0757	0.5113	0.7674	0.013	-0.0217	0.1848	0	0	0	-1	0	0	0	2	OnlyDuringLaterTimePoints
cce_3299		unknown	-0.0308	-0.0606	0.0611	-1.2314	1.6119	0.1549	0.6734	0	0	0	1	-1	0	-1	2	OnlyDuringLaterTimePoints
cce_3314		CHP02587-containing protein	0.2706	0.0145	-0.1705	-0.1407	-0.6619	-0.048	-0.1751	0	0	0	0	1	0	0	2	OnlyDuringLaterTimePoints
cce_3317		unknown; contains DUF88	-0.0543	-0.0974	0.118	-0.4357	0.662	0.0908	0.2715	0	0	0	0	-1	0	0	2	OnlyDuringLaterTimePoints
cce_3326		putative GTP cyclohydrolase I	-0.0881	0.0181	0.2993	-0.1981	1.0135	0.5415	1.409	0	0	0	0	-1	0	-1	2	OnlyDuringLaterTimePoints
cce_3331		conserved hypothetical protein	0.3708	-0.0636	-0.2406	-0.8964	0.5423	-0.5064	0.9854	0	0	0	1	0	0	-1	2	OnlyDuringLaterTimePoints
cce_3339		hypothetical protein	-0.1655	0.0651	0.3308	-0.3813	-0.8154	-0.7408	-0.6396	0	0	0	0	0	1	1	2	OnlyDuringLaterTimePoints
cce_3344		putative CAB/ELIP/HLIP family protein	-0.2244	0.2565	0.4046	0.976	0.5196	1.6755	0.5206	0	0	0	-1	0	-1	0	2	OnlyDuringLaterTimePoints
cce_3357		conserved hypothetical protein	0.0049	-0.0862	-0.0398	1.3243	-0.5929	0.7831	0.5724	0	0	0	-1	1	-1	0	2	OnlyDuringLaterTimePoints
cce_3360		hypothetical protein; contains a 2Fe-2S Ferredoxin-like domain	0.0933	-0.0802	-0.1863	-0.2234	-0.4251	-0.2148	-0.7403	0	0	0	0	0	0	1	2	OnlyDuringLaterTimePoints
cce_3363		conserved hypothetical protein	-0.3672	-0.3528	-0.1374	0.8404	-0.0245	0.7786	0.7843	0	0	0	-1	0	-1	-1	2	OnlyDuringLaterTimePoints
cce_3365		unknown	-0.5012	-0.4955	0.435	0.3024	0.1828	0.7645	0.7238	0	0	0	0	0	-1	-1	2	OnlyDuringLaterTimePoints
cce_3377		hypothetical protein	0.2762	-0.4021	-0.549	0.9065	-0.267	-0.3636	0.1161	0	0	0	-1	0	0	0	2	OnlyDuringLaterTimePoints
cce_3383		unknown	0.2196	0.067	0.1444	0.8136	-1.2138	0.1999	-1.1901	0	0	0	-1	1	0	1	2	OnlyDuringLaterTimePoints
cce_3384		hypothetical protein	-0.1457	-0.2262	0.0882	-0.5035	-1.8915	-0.4124	-1.3058	0	0	0	0	1	0	1	2	OnlyDuringLaterTimePoints
cce_3385		hypothetical protein; contains a Cyclic nucleotide-binding domain	0.005	-0.0286	-0.2092	-0.863	-1.6823	0.0681	-1.4146	0	0	0	1	1	0	1	2	OnlyDuringLaterTimePoints
cce_3390		conserved hypothetical protein	-0.0895	-0.0115	0.0207	-0.68	0.5806	0.5651	0.2058	0	0	0	1	0	0	0	2	OnlyDuringLaterTimePoints
cce_3391		unknown; contains a KH, prokaryotic type domain	-0.2079	-0.0255	-0.2333	-0.949	0.6617	0.401	-0.1955	0	0	0	1	-1	0	0	2	OnlyDuringLaterTimePoints
cce_3397		unknown; contains DUF309	-0.0541	0.222	-0.1863	0.126	0.3309	0.0943	0.9058	0	0	0	0	0	0	-1	2	OnlyDuringLaterTimePoints
cce_3412		hypothetical protein; contains a Ferritin/ribonucleotide reductase-like domain	0.177	-0.1183	-0.3131	-1.6074	0.2902	-0.6961	0.6269	0	0	0	1	0	1	0	2	OnlyDuringLaterTimePoints
cce_3416		unknown; contains an ABC-1 domain	0.16	-0.1539	-0.3876	0.308	0.6632	0.5153	0.2991	0	0	0	0	-1	0	0	2	OnlyDuringLaterTimePoints
cce_3419		unknown	-0.0851	-0.0636	0.1365	-0.227	0.6863	-0.0255	0.4656	0	0	0	0	-1	0	0	2	OnlyDuringLaterTimePoints
cce_3421		hypothetical protein	0.1601	-0.0224	0.0196	-0.1285	-0.6883	-0.2304	-0.4434	0	0	0	0	1	0	0	2	OnlyDuringLaterTimePoints
cce_3430		unknown	0.1739	0.0294	-0.48	-0.1561	0.1021	0.4213	-0.6042	0	0	0	0	0	0	1	2	OnlyDuringLaterTimePoints
cce_3431		hypothetical protein	0.0827	0.1254	-0.0585	-0.3801	-0.8936	-0.3361	-0.4051	0	0	0	0	1	0	0	2	OnlyDuringLaterTimePoints
cce_3436		unknown	-0.5505	-0.3317	-0.022	0.9544	-0.4731	0.8164	0.8224	0	0	0	-1	0	-1	-1	2	OnlyDuringLaterTimePoints
cce_3440		ThiJ/PfpI peptidase C56 family	0.0442	0.0817	-0.0825	0.0929	-0.6125	-0.0814	-0.7603	0	0	0	0	1	0	1	2	OnlyDuringLaterTimePoints
cce_3445		conserved hypothetical protein	-0.4446	-0.4884	-0.5535	1.4578	0.7039	1.3947	0.4065	0	0	0	-1	-1	-1	0	2	OnlyDuringLaterTimePoints
cce_3446		unknown	0.323	0.4797	-0.156	-1.4373	2.295	0.8941	-0.121	0	0	0	1	-1	-1	0	2	OnlyDuringLaterTimePoints
cce_3459		unknown; contains a Six-hairpin glycosidase domain	0.1307	0.0548	-0.1953	-0.3211	-0.7891	0.1121	-1.7383	0	0	0	0	1	0	1	2	OnlyDuringLaterTimePoints
cce_3470		hypothetical protein; contains a Rhodanese-like domain	0.177	-0.0099	-0.2819	-0.9673	0.3793	-0.263	-0.1263	0	0	0	1	0	0	0	2	OnlyDuringLaterTimePoints
cce_3471		hypothetical protein; contains DUF81	0.0802	-0.0594	-0.2814	-0.6418	0.2029	-0.2644	-0.2678	0	0	0	1	0	0	0	2	OnlyDuringLaterTimePoints
cce_3478		hypothetical protein; contains a PEP motif putative anchor, C-terminal domain	0.0935	-0.3299	-0.1491	0.2899	-0.7522	-0.1006	-0.0855	0	0	0	0	1	0	0	2	OnlyDuringLaterTimePoints
cce_3481		hypothetical protein	-0.1541	0.0306	-0.0579	-0.9243	-0.5182	-1.1982	-0.2944	0	0	0	1	0	1	0	2	OnlyDuringLaterTimePoints
cce_3502		unknown	0.2344	0.3763	-0.2056	-0.1954	-0.3204	0.6332	-0.3045	0	0	0	0	0	-1	0	2	OnlyDuringLaterTimePoints
cce_3505		unknown; contains a TolB, C-terminal domain	-0.368	-0.094	0.0983	1.1521	0.1128	1.273	0.3911	0	0	0	-1	0	-1	0	2	OnlyDuringLaterTimePoints
cce_3506		unknown	-0.1553	-0.0213	-0.1169	1.295	0.0154	0.9638	0.0159	0	0	0	-1	0	-1	0	2	OnlyDuringLaterTimePoints
cce_3507		hypothetical protein; contains DUF318, transmembrane	-0.1227	-0.077	-0.3333	1.3622	0.3372	0.9275	0.7334	0	0	0	-1	0	-1	-1	2	OnlyDuringLaterTimePoints
cce_3509		unknown; contains Molybdopterin dehydrogenase, FAD-binding and CO dehydrogenase flavoprotein, C-terminal domains	-0.0461	-0.1407	-0.1795	-0.2577	0.6318	0.3392	-0.077	0	0	0	0	-1	0	0	2	OnlyDuringLaterTimePoints
cce_3515		unknown; contains aNmrA-like domain	-0.0828	-0.1393	0.0309	-1.0846	-0.5317	-0.9671	-0.0431	0	0	0	1	0	1	0	2	OnlyDuringLaterTimePoints
cce_3524		hypothetical protein	0.1246	-0.0244	-0.0921	0.6644	-0.6837	0.3507	-0.8378	0	0	0	-1	1	0	1	2	OnlyDuringLaterTimePoints
cce_3527		conserved hypothetical protein	-0.1177	0.1771	0.4553	0.4396	-1.4663	0.0674	-0.5923	0	0	0	0	1	0	0	2	OnlyDuringLaterTimePoints
cce_3528		hypothetical protein; contains an alpha/beta hydrolase fold-1 domain	0.1308	-0.156	0.0592	0.3286	-0.5749	0.5199	-0.6921	0	0	0	0	0	0	1	2	OnlyDuringLaterTimePoints
cce_3533		putative Methylenetetrahydrofolate reductase	-0.0935	0.1226	-0.1436	-0.7046	0.1391	0.4172	0.1209	0	0	0	1	0	0	0	2	OnlyDuringLaterTimePoints
cce_3545		unknown	0.028	-0.307	-0.0436	0.6977	0.1502	0.2507	0.1665	0	0	0	-1	0	0	0	2	OnlyDuringLaterTimePoints
cce_3549		hypothetical protein	0.0708	-0.1341	-0.1672	-0.4604	-0.6371	-0.3641	-0.2154	0	0	0	0	1	0	0	2	OnlyDuringLaterTimePoints
cce_3563		putative ATP-dependent Clp protease, adaptor protein; clpS2	-0.2305	-0.1509	0.0399	-0.6434	-0.3049	-1.2511	0.3832	0	0	0	1	0	1	0	2	OnlyDuringLaterTimePoints
cce_3564		unknown	0.0435	0.1032	0.0419	-0.7107	-0.0578	0.1738	0.3567	0	0	0	1	0	0	0	2	OnlyDuringLaterTimePoints
cce_3568		putative twin-arginine translocation protein TatA/E	-0.0236	-0.171	0.3463	-0.0299	-0.3375	0.0224	0.9383	0	0	0	0	0	0	-1	2	OnlyDuringLaterTimePoints
cce_3569		putative ferredoxin-dependent bilin reductase	-0.1932	0.2341	-0.0056	-0.6558	0.3518	0.0426	0.8668	0	0	0	1	0	0	-1	2	OnlyDuringLaterTimePoints
cce_3572		conserved hypothetical protein	0.1984	-0.0334	0.4782	0.6194	-0.7162	-0.0441	-0.7351	0	0	0	0	1	0	1	2	OnlyDuringLaterTimePoints
cce_3575		CHP701-containing protein	0.1057	0.1127	0.2777	-0.6341	0.513	0.5028	1.2181	0	0	0	0	0	0	-1	2	OnlyDuringLaterTimePoints
cce_3582		conserved hypothetical protein	0.1816	0.0089	-0.0668	0.9607	0.7008	0.2798	-0.3918	0	0	0	-1	-1	0	0	2	OnlyDuringLaterTimePoints
cce_3584		putative membrane protein	-0.1848	0.271	0.0027	0.998	-0.0144	1.1197	0.1932	0	0	0	-1	0	-1	0	2	OnlyDuringLaterTimePoints
cce_3589		hypothetical protein	0.195	0.2103	0.2564	0.9057	0.32	0.7297	0.1609	0	0	0	-1	0	0	0	2	OnlyDuringLaterTimePoints
cce_3606		putative Band 7 protein	0.0564	0.3942	0.4067	1.3256	0.0722	0.2433	-1.1378	0	0	0	-1	0	0	1	2	OnlyDuringLaterTimePoints
cce_3607		putative D-xylulose 5-phosphate/D-fructose 6-phosphate phosphoketolase	0.1024	0.1949	-0.4847	0.427	-0.4087	-0.9657	-0.7776	0	0	0	0	0	1	1	2	OnlyDuringLaterTimePoints
cce_3608		unknown	0.1857	0.2119	-0.3365	0.6241	-0.2099	-0.8163	-0.7079	0	0	0	-1	0	0	0	2	OnlyDuringLaterTimePoints
cce_3615		unknown	-0.0103	0.0117	-0.1876	-1.2142	0.1793	-0.0534	0.1394	0	0	0	1	0	0	0	2	OnlyDuringLaterTimePoints
cce_3616		hypothetical protein	0.0408	0.0816	0.424	0.8719	-0.6549	0.2164	-0.0683	0	0	0	-1	1	0	0	2	OnlyDuringLaterTimePoints
cce_3628		unknown	-0.0003	0.2238	0.4735	-0.4728	0.2079	-0.0615	0.7582	0	0	0	0	0	0	-1	2	OnlyDuringLaterTimePoints
cce_3631		unknown; contains a Thioredoxin-like fold domain	-0.1549	0.1333	0.0375	-0.645	-0.0355	0.504	-0.1781	0	0	0	1	0	0	0	2	OnlyDuringLaterTimePoints
cce_3639		hypothetical protein	0.0696	-0.263	-0.0229	0.6104	-0.4662	-0.7023	-0.7031	0	0	0	0	0	1	0	2	OnlyDuringLaterTimePoints
cce_3640		hypothetical protein	-0.2489	0.2308	0.2227	-0.5412	-2.9671	-0.7181	-4.1435	0	0	0	0	1	1	1	2	OnlyDuringLaterTimePoints
cce_3643		unknown	-0.2055	0.0098	0.3086	0.4608	0.0562	0.7117	0.1644	0	0	0	0	0	-1	0	2	OnlyDuringLaterTimePoints
cce_3644		conserved hypothetical protein	-0.1865	0.0053	0.3609	0.4318	-0.0441	0.7659	-0.0381	0	0	0	0	0	-1	0	2	OnlyDuringLaterTimePoints
cce_3652		conserved hypothetical protein	0.4042	0.3957	-0.2578	0.6148	0.7572	0.4884	0.7379	0	0	0	-1	-1	0	-1	2	OnlyDuringLaterTimePoints
cce_3653		DUF1257-containing protein	0.4155	0.3824	-0.2272	0.6984	0.8309	0.627	0.8115	0	0	0	-1	-1	-1	-1	2	OnlyDuringLaterTimePoints
cce_3656		DUF205-containing protein	-0.053	-0.0238	0.0601	-0.7485	-0.9172	-0.5733	-1.7524	0	0	0	1	1	0	1	2	OnlyDuringLaterTimePoints
cce_3657		unknown	0.1982	0.0778	-0.2515	-0.605	-0.4459	-0.3222	-1.6905	0	0	0	1	0	0	1	2	OnlyDuringLaterTimePoints
cce_3658		conserved hypothetical protein	0.2294	0.2539	-0.1064	-0.0795	0.3168	0.2662	-0.9161	0	0	0	0	0	0	1	2	OnlyDuringLaterTimePoints
cce_3669		hypothetical protein	-0.326	-0.1025	0.4636	0.8973	-0.3768	0.178	0.087	0	0	0	-1	0	0	0	2	OnlyDuringLaterTimePoints
cce_3671		hypothetical protein; contains a polynucleotidyl transferase, Ribonuclease H fold domain	0.1388	0.1165	-0.0934	0.3112	-0.7342	-0.0429	-1.2855	0	0	0	0	0	0	1	2	OnlyDuringLaterTimePoints
cce_3673		putative Tic22-like protein	0.0578	-0.0065	0.1755	1.0873	-0.4123	0.0415	-0.5981	0	0	0	-1	0	0	1	2	OnlyDuringLaterTimePoints
cce_3676		unknown; contains a Mechanosensitive ion channel, MscS domain	-0.0422	-0.01	0.3981	0.8712	0.5811	-0.1831	0.2406	0	0	0	-1	0	0	0	2	OnlyDuringLaterTimePoints
cce_3680		conserved hypothetical protein	-0.0223	0.0328	0.4591	0.6408	0.7242	0.2107	0.7041	0	0	0	-1	-1	0	-1	2	OnlyDuringLaterTimePoints
cce_3694		conserved hypothetical protein	0.0822	-0.144	-0.3472	0.9096	0.4926	0.3513	0.0139	0	0	0	-1	0	0	0	2	OnlyDuringLaterTimePoints
cce_3704		unknown; contains a PRC-barrel domain	-0.1691	-0.1627	0.1565	0.3492	-1.018	0.0888	-0.8656	0	0	0	0	1	0	1	2	OnlyDuringLaterTimePoints
cce_3705		unknown; contains a UspA domain	0.1203	0.2111	-0.179	-0.3279	-2.1584	-0.715	-3.642	0	0	0	0	1	1	1	2	OnlyDuringLaterTimePoints
cce_3720		DUF218-containing protein	-0.0205	-0.0748	-0.2496	0.3139	-0.745	-0.0349	-0.3453	0	0	0	0	1	0	0	2	OnlyDuringLaterTimePoints
cce_3721		hypothetical protein; contains a Rho termination factor, N-terminal domain	0.0885	-0.07	-0.3843	-1.3645	1.1367	-0.6827	-0.2471	0	0	0	1	-1	1	0	2	OnlyDuringLaterTimePoints
cce_3732		unknown	0.1149	0.2756	0.0686	0.3926	-0.8186	-0.3309	0.2503	0	0	0	0	1	0	0	2	OnlyDuringLaterTimePoints
cce_3735		unknown	-0.0453	-0.1168	0.0182	-0.6362	0.5338	-0.0433	0.4897	0	0	0	1	0	0	0	2	OnlyDuringLaterTimePoints
cce_3736		conserved hypothetical protein	0.1702	-0.1134	0.4076	0.0141	0.8462	1.0811	0.5977	0	0	0	0	-1	-1	-1	2	OnlyDuringLaterTimePoints
cce_3743		unknown	-0.064	0.0154	-0.2788	-0.4058	0.7101	-0.083	0.2195	0	0	0	0	-1	0	0	2	OnlyDuringLaterTimePoints
cce_3747		unknown; contains a BRCT domain	-0.2897	0.2902	0.0323	-1.3686	0.582	-0.7239	0.1075	0	0	0	1	0	1	0	2	OnlyDuringLaterTimePoints
cce_3748		unknown	0.1574	0.188	-0.2408	-1.2133	0.3803	-0.054	0.0954	0	0	0	1	0	0	0	2	OnlyDuringLaterTimePoints
cce_3749		unknown	0.295	0.0794	-0.2021	-1.2748	0.7947	0.3851	0.0415	0	0	0	1	-1	0	0	2	OnlyDuringLaterTimePoints
cce_3752		conserved hypothetical protein	0.1445	-0.1933	-0.1514	-0.5075	-0.6541	0.2121	-0.5614	0	0	0	0	1	0	0	2	OnlyDuringLaterTimePoints
cce_3756		unknown	-0.4463	-0.0132	0.0329	-0.7083	0.0089	0.2769	0.6605	0	0	0	1	0	0	-1	2	OnlyDuringLaterTimePoints
cce_3769		unknown	-0.0988	-0.1134	0.1903	0.8167	-0.4802	-0.3878	-0.3176	0	0	0	-1	0	0	0	2	OnlyDuringLaterTimePoints
cce_3770		hypothetical protein	0.0935	-0.129	-0.1842	0.5474	-0.025	-0.4157	-0.6906	0	0	0	0	0	0	1	2	OnlyDuringLaterTimePoints
cce_3774		unknown; contains an Armadillo-like helical domain	0.0704	-0.1202	-0.2956	0.2427	-0.5913	0.11	-0.9447	0	0	0	0	0	0	1	2	OnlyDuringLaterTimePoints
cce_3777		unknown	-0.2953	-0.1735	0.2435	-0.3713	-0.2252	-0.2371	-0.9134	0	0	0	0	0	0	1	2	OnlyDuringLaterTimePoints
cce_3778		unknown	0.012	0.0708	0.1154	-0.8451	-0.4883	-0.0344	-1.6049	0	0	0	1	0	0	1	2	OnlyDuringLaterTimePoints
cce_3792		hypothetical protein	-0.0365	0.0658	-0.2846	-0.1	-0.1304	-0.669	-0.1636	0	0	0	0	0	1	0	2	OnlyDuringLaterTimePoints
cce_3794		putative globin-like protein	0.039	0.0758	-0.1402	0.2298	-0.0863	0.0268	-1.2003	0	0	0	0	0	0	1	2	OnlyDuringLaterTimePoints
cce_3795		hypothetical protein; contains a methyltransferase type 11 domain	-0.0164	0.086	-0.1088	0.44	-1.0963	-0.0784	-1.3937	0	0	0	0	1	0	1	2	OnlyDuringLaterTimePoints
cce_3797		hypothetical protein	-0.008	0.0757	-0.0883	-0.2491	-3.5399	-1.177	-0.4814	0	0	0	0	1	1	0	2	OnlyDuringLaterTimePoints
cce_3798		hypothetical protein; contains a cyclic nucleotide-binding domain and a winged helix repressor DNA-binding domain	-0.0164	-0.1211	0.0585	-0.3785	-3.2421	-1.0301	-0.5029	0	0	0	0	1	1	0	2	OnlyDuringLaterTimePoints
cce_3811		hypothetical protein	0.142	0.1296	0.13	-0.2149	-0.9262	-0.5619	-0.4172	0	0	0	0	1	0	0	2	OnlyDuringLaterTimePoints
cce_3812		unknown	0.0747	0.1567	0.384	0.3041	0.6465	0.3018	-0.0188	0	0	0	0	-1	0	0	2	OnlyDuringLaterTimePoints
cce_3818		hypothetical protein	0.0826	-0.0255	-0.1452	-0.1089	0.0569	-0.2374	-0.6165	0	0	0	0	0	0	1	2	OnlyDuringLaterTimePoints
cce_3820		conserved hypothetical protein	0.1663	-0.0171	-0.1481	-0.3878	-0.6729	0.0429	-0.9251	0	0	0	0	1	0	1	2	OnlyDuringLaterTimePoints
cce_3823		hypothetical protein; contains UPF0118	0.1365	0.2319	0.2298	0.6175	0.0045	0.3196	0.1459	0	0	0	-1	0	0	0	2	OnlyDuringLaterTimePoints
cce_3839		hypothetical protein	-0.1111	0.2204	0.1266	0.248	0.0903	-0.6832	0.4414	0	0	0	0	0	1	0	2	OnlyDuringLaterTimePoints
cce_3856		hypothetical protein	0.2434	0.1016	-0.1918	0.0375	-1.7565	-0.6689	-1.3876	0	0	0	0	1	1	1	2	OnlyDuringLaterTimePoints
cce_3857		hypothetical protein	0.2377	-0.0112	-0.2588	-0.0378	-1.645	-0.5674	-1.3055	0	0	0	0	1	0	1	2	OnlyDuringLaterTimePoints
cce_3867		putative carbohydrate-selective OprB family porin fragment; nonfunctional due to frameshift	0.0801	0.0131	0.1125	0.1031	-1.1123	-0.2884	-0.2865	0	0	0	0	1	0	0	2	OnlyDuringLaterTimePoints
cce_3875		unknown	0.0325	0.0685	-0.2267	-0.4905	0.9115	-0.1622	0.8793	0	0	0	0	-1	0	0	2	OnlyDuringLaterTimePoints
cce_3897		unknown	0.395	-0.0494	0.0372	0.799	-2.006	0.6912	-1.6357	0	0	0	-1	1	-1	1	2	OnlyDuringLaterTimePoints
cce_3898		unknown	0.2112	0.0747	-0.2366	0.6941	-0.7973	0.3841	-1.2011	0	0	0	-1	1	0	1	2	OnlyDuringLaterTimePoints
cce_3902		hypothetical protein	-0.0439	-0.0178	0.0941	0.1224	-0.6863	-0.4069	-0.2968	0	0	0	0	1	0	0	2	OnlyDuringLaterTimePoints
cce_3909		conserved hypothetical protein	-0.2697	-0.0491	-0.4215	0.12	-0.0465	-0.854	0.3657	0	0	0	0	0	1	0	2	OnlyDuringLaterTimePoints
cce_3910		conserved hypothetical protein	-0.2152	-0.1173	-0.3025	0.2261	-0.0143	-0.3798	0.5857	0	0	0	0	0	0	-1	2	OnlyDuringLaterTimePoints
cce_3911		hypothetical protein; contains DUF497	-0.2466	-0.1676	0.27	0.6404	-0.1344	-0.209	0.2693	0	0	0	-1	0	0	0	2	OnlyDuringLaterTimePoints
cce_3915		hypothetical protein	-0.1443	-0.2349	-0.0386	0.6408	0.0519	-0.4803	0.1887	0	0	0	-1	0	0	0	2	OnlyDuringLaterTimePoints
cce_3919		putative endoribonuclease L-PSP	-0.2106	-0.2281	0.156	0.1179	-0.2723	-0.7945	0.2013	0	0	0	0	0	1	0	2	OnlyDuringLaterTimePoints
cce_3926		unknown	0.0631	0.0628	-0.0886	0.0241	-1.1047	-0.007	-0.7368	0	0	0	0	1	0	1	2	OnlyDuringLaterTimePoints
cce_3927		unknown	0.0186	0.5317	0.2611	1.5524	-2.0314	0.4903	0.1755	0	0	0	-1	1	0	0	2	OnlyDuringLaterTimePoints
cce_3930		hypothetical protein	0.0689	0.082	-0.3937	-0.49	-1.6314	-1.0615	-1.0718	0	0	0	0	1	1	1	2	OnlyDuringLaterTimePoints
cce_3936		unknown	-0.0657	0.0288	0.578	0.585	0.2677	0.9567	0.8593	0	0	0	-1	0	-1	-1	2	OnlyDuringLaterTimePoints
cce_3939		unknown	0.1665	0.043	-0.0047	0.3044	-1.0766	0.1692	-1.2655	0	0	0	0	1	0	1	2	OnlyDuringLaterTimePoints
cce_3949		hypothetical protein	-0.019	-0.1728	0.05	0.3778	-1.0609	-0.5698	-0.9971	0	0	0	0	1	0	1	2	OnlyDuringLaterTimePoints
cce_3954		unknown	0.0398	0.0177	0.0391	0.1051	-0.7987	-0.5044	-0.461	0	0	0	0	1	0	0	2	OnlyDuringLaterTimePoints
cce_3956		hypothetical protein	0.1947	0.1927	-0.1468	1.0092	-0.375	0.3292	-1.1729	0	0	0	-1	0	0	1	2	OnlyDuringLaterTimePoints
cce_3966		hypothetical protein	0.3841	0.3099	0.471	0.3964	-1.1448	0.077	-0.5332	0	0	0	0	1	0	0	2	OnlyDuringLaterTimePoints
cce_3978		hypothetical protein; contains DUF1400	0.0723	0.0636	0.3119	1.0418	0.1827	0.1319	0.6607	0	0	0	-1	0	0	-1	2	OnlyDuringLaterTimePoints
cce_3986		putative 4-hydroxybenzoyl-CoA thioesterase	-0.0785	-0.1006	-0.3881	-0.6874	0.054	0.1271	-0.2909	0	0	0	1	0	0	0	2	OnlyDuringLaterTimePoints
cce_3998		unknown	-0.067	-0.0214	-0.2775	0.01	-0.074	0.0801	-0.6241	0	0	0	0	0	0	1	2	OnlyDuringLaterTimePoints
cce_4010		putative Fructosamine kinase	-0.0253	-0.0022	0.1093	-0.259	0.7055	0.2686	0.3204	0	0	0	0	-1	0	0	2	OnlyDuringLaterTimePoints
cce_4012		hypothetical protein	0.0564	0.0986	0.0778	0.1408	-0.7852	0.2906	-0.7671	0	0	0	0	1	0	1	2	OnlyDuringLaterTimePoints
cce_4046		hypothetical protein; contains a glyoxalase/extradiol ring-cleavage dioxygenase domain	0.003	-0.0271	0.303	-0.4294	-0.304	0.103	-0.5937	0	0	0	0	0	0	1	2	OnlyDuringLaterTimePoints
cce_4056		unknown; contains TrkA-N and TrkA-C domains	0.0412	-0.0897	-0.19	-0.662	0.1162	0.0367	-0.2001	0	0	0	1	0	0	0	2	OnlyDuringLaterTimePoints
cce_4058		hypothetical protein	0.0102	0.01	0.492	0.2091	-0.6319	-0.0882	0.3118	0	0	0	0	1	0	0	2	OnlyDuringLaterTimePoints
cce_4065		putative Ribonuclease Z	0.1055	0.026	-0.1409	0.6291	-0.0065	0.1332	-0.9265	0	0	0	-1	0	0	1	2	OnlyDuringLaterTimePoints
cce_4067		unknown; contains DUF172	0.0214	-0.1165	-0.2191	-0.5002	-0.3109	-0.1638	-0.7803	0	0	0	0	0	0	1	2	OnlyDuringLaterTimePoints
cce_4075		putative ATP-NAD/AcoX kinase	0.0886	0.1596	-0.1296	-1.3155	-0.2662	-0.6044	-0.0274	0	0	0	1	0	1	0	2	OnlyDuringLaterTimePoints
cce_4078		conserved hypothetical protein	-0.2198	0.2483	-0.0484	-0.0463	-3.2479	-0.4632	-2.8035	0	0	0	0	1	0	1	2	OnlyDuringLaterTimePoints
cce_4085		hypothetical protein	0.1556	0.1398	-0.2162	-0.1947	0.6244	0.4565	-0.0677	0	0	0	0	-1	0	0	2	OnlyDuringLaterTimePoints
cce_4094		unknown	-0.0237	0.2025	0.26	0.1799	0.6351	0.3677	0.3606	0	0	0	0	-1	0	0	2	OnlyDuringLaterTimePoints
cce_4096		unknown	-0.0962	-0.1043	0.137	1.4979	-0.342	-0.3702	0.2785	0	0	0	-1	0	0	0	2	OnlyDuringLaterTimePoints
cce_4100		unknown	-0.0197	-0.0385	0.5316	-0.073	0.6302	-0.0387	0.9125	0	0	0	0	-1	0	-1	2	OnlyDuringLaterTimePoints
cce_4104		hypothetical protein	-0.066	-0.0487	0.1326	0.9214	0.0839	-0.3159	-0.1933	0	0	0	-1	0	0	0	2	OnlyDuringLaterTimePoints
cce_4108		conserved hypothetical protein	0.056	0.2262	0.2763	2.0829	0.8634	-0.037	0.8708	0	0	0	-1	-1	0	-1	2	OnlyDuringLaterTimePoints
cce_4112		hypothetical protein; contains a glucose-methanol-choline oxidoreductase domain	0.0345	0.0848	0.1539	1.1412	0.092	0.0308	0.0867	0	0	0	-1	0	0	0	2	OnlyDuringLaterTimePoints
cce_4116		hypothetical protein; contains DUF477	0.0544	0.1474	0.0094	-0.8302	-0.2815	-0.2133	0.4497	0	0	0	1	0	0	0	2	OnlyDuringLaterTimePoints
cce_4121		unknown	0.0306	0.1404	-0.3395	-0.8836	0.22	-0.172	0.1722	0	0	0	1	0	0	0	2	OnlyDuringLaterTimePoints
cce_4136		hypothetical protein; contains a glycosyl transferase, family 39 and a TPR-like helical domain	-0.29	-0.2051	0.1521	0.774	-0.0846	0.8053	0.4223	0	0	0	-1	0	-1	0	2	OnlyDuringLaterTimePoints
cce_4139		hypothetical protein; contains peptidoglycan-binding domain 1	-0.0569	0.1758	-0.4789	-0.7116	-4.4474	-0.4309	-3.7333	0	0	0	1	1	0	1	2	OnlyDuringLaterTimePoints
cce_4141		conserved hypothetical protein	-0.3489	-0.0174	-0.2433	1.2486	-0.6427	0.8708	0.6419	0	0	0	-1	1	-1	-1	2	OnlyDuringLaterTimePoints
cce_4143		unknown	0.0111	-0.0591	-0.249	-0.6264	0.0755	0.0634	-0.3775	0	0	0	1	0	0	0	2	OnlyDuringLaterTimePoints
cce_4144		unknown; contains a Like-Sm ribonucleoprotein-related protein core domain	-0.2159	-0.0964	-0.4049	-1.3784	-1.2425	-0.3961	-0.9678	0	0	0	1	1	0	1	2	OnlyDuringLaterTimePoints
cce_4148		unknown	-0.2087	-0.2508	0.6679	0.5299	0.4965	-0.9029	1.0862	0	0	0	0	0	0	-1	2	OnlyDuringLaterTimePoints
cce_4149		hypothetical protein; contains a methyltransferase type 11 domain	0.0313	0.0685	0.2031	0.6224	0.4327	0.3001	0.2186	0	0	0	-1	0	0	0	2	OnlyDuringLaterTimePoints
cce_4154		unknown	0.0001	0.0788	0.5475	1.2643	0.5602	-0.7253	0.258	0	0	0	-1	0	1	0	2	OnlyDuringLaterTimePoints
cce_4161		unknown; contains a Cyclic nucleotide-binding domain	-0.0064	-0.0525	0.3204	-0.4856	0.5858	-0.256	0.2448	0	0	0	0	-1	0	0	2	OnlyDuringLaterTimePoints
cce_4162		unknown; contains a Cyclic nucleotide-binding domain	0.0181	-0.0056	0.0745	-0.775	0.2217	-0.0942	0.1216	0	0	0	1	0	0	0	2	OnlyDuringLaterTimePoints
cce_4166		unknown; contains a CBS domain	-0.0047	-0.0452	-0.271	-0.8074	1.2624	0.0078	-0.0455	0	0	0	1	-1	0	0	2	OnlyDuringLaterTimePoints
cce_4174		hypothetical protein	0.5302	0.2141	-0.3858	-0.433	-1.6172	-0.6242	-0.8589	0	0	0	0	1	1	1	2	OnlyDuringLaterTimePoints
cce_4177		hypothetical protein; contains a GGDEF domain, Forkhead-associated domain, EAL domain, SMAD/FHA domain, and a PAS fold domain	-0.0378	-0.1768	-0.0182	-0.0864	-0.5312	-0.0682	-0.688	0	0	0	0	0	0	1	2	OnlyDuringLaterTimePoints
cce_4180		hypothetical protein	-0.1453	0.0902	0.2653	0.2031	0.8388	0.1577	-0.0781	0	0	0	0	-1	0	0	2	OnlyDuringLaterTimePoints
cce_4181		hypothetical protein	0.0057	0.1989	0.4461	0.3196	0.8564	0.0955	-0.2195	0	0	0	0	-1	0	0	2	OnlyDuringLaterTimePoints
cce_4182		hypothetical protein	-0.3486	-0.3507	0.3203	-1.029	0.1775	-0.5298	-0.0212	0	0	0	1	0	0	0	2	OnlyDuringLaterTimePoints
cce_4185		putative adenosine/AMP deaminase	0.0461	0.4105	0.2127	0.5071	1.3029	0.8127	0.913	0	0	0	0	-1	-1	-1	2	OnlyDuringLaterTimePoints
cce_4192		hypothetical protein	0.149	-0.0652	0.1141	0.358	-0.6875	-0.1376	-0.1382	0	0	0	0	1	0	0	2	OnlyDuringLaterTimePoints
cce_4202		putative Hybrid cluster protein	0.0515	-0.1458	-0.1245	-0.2	0.6417	0.0416	-0.3596	0	0	0	0	-1	0	0	2	OnlyDuringLaterTimePoints
cce_4205		hypothetical protein; contains a GCN5-related N-acetyltransferase domain	0.2703	-0.1611	0.0447	-1.65	0.8926	0.4002	-0.2648	0	0	0	1	-1	0	0	2	OnlyDuringLaterTimePoints
cce_4215		hypothetical protein	-0.1855	-0.0869	0.2308	0.0374	-0.086	-0.6036	-0.0475	0	0	0	0	0	1	0	2	OnlyDuringLaterTimePoints
cce_4220		unknown; contains a UspA domain	-0.0449	-0.2292	0.08	-0.3064	-0.6196	-0.4125	-0.9683	0	0	0	0	1	0	1	2	OnlyDuringLaterTimePoints
cce_4223		hypothetical protein; contains a neurotransmitter-gated ion-channel domain	0.0473	0.1574	0.5817	0.8743	1.0299	0.6806	0.9165	0	0	0	-1	-1	-1	-1	2	OnlyDuringLaterTimePoints
cce_4243		CHP1784-containing protein	0.2674	-0.1509	0.1681	0.7482	0.9641	0.3253	-0.2841	0	0	0	0	-1	0	0	2	OnlyDuringLaterTimePoints
cce_4248		hypothetical protein	0.0539	0.0665	-0.1378	0.4705	0.0625	0.7765	-0.4222	0	0	0	0	0	-1	0	2	OnlyDuringLaterTimePoints
cce_4272		unknown; contains a UspA domain	0.0272	0.3769	-0.0911	-0.9961	-0.193	-0.353	0.4208	0	0	0	1	0	0	0	2	OnlyDuringLaterTimePoints
cce_4275		hypothetical protein	0.0918	0.0438	-0.0518	-0.1162	-1.1714	-0.2243	-0.2227	0	0	0	0	1	0	0	2	OnlyDuringLaterTimePoints
cce_4276		CHP1784-containing protein	-0.4241	-0.3721	0.3263	0.0735	-0.1043	-0.6576	-0.0374	0	0	0	0	0	1	0	2	OnlyDuringLaterTimePoints
cce_4285		hypothetical protein	0.0131	-0.0595	-0.1894	-0.7977	-0.488	-0.6752	0.0995	0	0	0	1	0	1	0	2	OnlyDuringLaterTimePoints
cce_4294		unknown; contains a GUN4-like domain	-0.2027	-0.1543	0.0039	-0.8441	0.1517	0.0534	0.2522	0	0	0	1	0	0	0	2	OnlyDuringLaterTimePoints
cce_4300		hypothetical protein; contains DUF512 and PDZ/DHR/GLGF domains	-0.1744	-0.106	0.2387	-0.143	0.3479	0.1535	0.6174	0	0	0	0	0	0	-1	2	OnlyDuringLaterTimePoints
cce_4303		conserved hypothetical protein	0.2143	0.1306	-0.3084	-0.2777	0.0381	0.4147	-0.7114	0	0	0	0	0	0	1	2	OnlyDuringLaterTimePoints
cce_4306		unknown; contains a FAD linked oxidase, N-terminal domain	-0.3123	0.2724	0.123	0.2836	-2.2072	-1.0309	-1.1485	0	0	0	0	1	1	1	2	OnlyDuringLaterTimePoints
cce_4307		putative haem peroxidase	0.2083	0.2014	-0.128	0.3272	-0.9447	-0.1088	-1.57	0	0	0	0	1	0	1	2	OnlyDuringLaterTimePoints
cce_4308		hypothetical protein; contains a cobalamin (vitamin B12) biosynthesis CbiX domain	0.2792	0.3626	0.5465	0.8252	0.024	0.7826	0.5856	0	0	0	-1	0	-1	0	2	OnlyDuringLaterTimePoints
cce_4313		hypothetical protein	-0.3136	-0.2833	-0.4284	0.4571	-0.6009	0.7454	0.1093	0	0	0	0	1	0	0	2	OnlyDuringLaterTimePoints
cce_4315		hypothetical protein	0.0911	0.1605	0.3198	0.2485	1.0913	0.1317	0.8449	0	0	0	0	-1	0	-1	2	OnlyDuringLaterTimePoints
cce_4326		conserved hypothetical protein	0.0718	-0.0251	-0.1574	0.5208	-0.108	0.6921	-0.9917	0	0	0	0	0	-1	1	2	OnlyDuringLaterTimePoints
cce_4330		NADH dehydrogenase subunit O; ndhO	-0.1837	-0.3832	0.4819	-0.4439	0.5531	-0.2763	1.0894	0	0	0	0	0	0	-1	2	OnlyDuringLaterTimePoints
cce_4331		hypothetical protein	-0.1841	-0.0523	0.1296	-0.3119	-0.6385	-0.7472	-0.259	0	0	0	0	1	1	0	2	OnlyDuringLaterTimePoints
cce_4359		hypothetical protein; contains a HNH nuclease domain	0.0615	0.2032	0.1925	-0.6429	0.2379	-0.3047	0.3502	0	0	0	1	0	0	0	2	OnlyDuringLaterTimePoints
cce_4361		unknown	-0.1274	-0.2014	-0.0086	-0.5277	0.6518	-0.6425	0.5706	0	0	0	0	-1	1	0	2	OnlyDuringLaterTimePoints
cce_4372		hypothetical protein; contains DUF433	0.2026	0.3051	0.3391	0.2754	0.4689	0.796	-0.1343	0	0	0	0	0	-1	0	2	OnlyDuringLaterTimePoints
cce_4375		hypothetical protein	0.1246	-0.326	0.0681	1.4739	-0.3955	-0.3115	-0.2097	0	0	0	-1	0	0	0	2	OnlyDuringLaterTimePoints
cce_4377		DUF1092-containing protein	-0.0847	0.0377	0.0857	-0.6373	0.1658	0.0007	0.3853	0	0	0	1	0	0	0	2	OnlyDuringLaterTimePoints
cce_4379		CHP103-containing protein	0.0497	0.2762	0.3916	-0.591	0.6184	0.6681	1.2887	0	0	0	1	-1	-1	-1	2	OnlyDuringLaterTimePoints
cce_4387		hypothetical protein	0.0083	-0.0887	0.0154	-0.036	-0.1932	-0.6174	-0.1799	0	0	0	0	0	1	0	2	OnlyDuringLaterTimePoints
cce_4389		unknown	-0.1474	-0.1903	0.1654	-0.338	-0.8627	-0.1945	-0.7465	0	0	0	0	1	0	1	2	OnlyDuringLaterTimePoints
cce_4392		hypothetical protein	0.2542	-0.0163	0.2584	0.5242	-1.3831	-0.4799	-1.1957	0	0	0	0	1	0	1	2	OnlyDuringLaterTimePoints
cce_4402		putative TspO/MBR-like protein	0.2847	0.122	0.1238	-0.3302	-0.9139	0.3888	-0.5093	0	0	0	0	1	0	0	2	OnlyDuringLaterTimePoints
cce_4411		hypothetical protein; contains DUF820	-0.0463	-0.1028	-0.0901	-0.6075	0.211	-0.3277	-0.026	0	0	0	1	0	0	0	2	OnlyDuringLaterTimePoints
cce_4412		magnesium-protoporphyrin IX monomethyl ester aerobic oxidative cyclase	-0.3709	-0.5819	-0.3978	-1.7408	1.8251	-0.739	1.9781	0	0	0	1	-1	1	-1	2	OnlyDuringLaterTimePoints
cce_4422		unknown	-0.1205	0.2959	0.0227	0.2717	-0.6969	-0.1882	-0.8831	0	0	0	0	1	0	1	2	OnlyDuringLaterTimePoints
cce_4427		unknown	0.0327	0.1446	0.1371	-0.1328	0.2469	-0.1369	0.647	0	0	0	0	0	0	-1	2	OnlyDuringLaterTimePoints
cce_4430		putative sialidase	-0.1376	0.0925	0.265	0.0162	0.5661	0.3953	0.73	0	0	0	0	0	0	-1	2	OnlyDuringLaterTimePoints
cce_4431		conserved hypothetical protein	-0.0599	0.0094	0.2586	-0.2223	0.4022	-0.1957	0.6346	0	0	0	0	0	0	-1	2	OnlyDuringLaterTimePoints
cce_4435		hypothetical protein	0.0061	-0.0926	0.0192	1.1714	1.0644	-0.3775	0.2628	0	0	0	-1	-1	0	0	2	OnlyDuringLaterTimePoints
cce_4437		putative 1125	0.1787	-0.2095	-0.1332	0.2389	0.8589	0.4517	-0.3635	0	0	0	0	-1	0	0	2	OnlyDuringLaterTimePoints
cce_4467		hypothetical protein	0.1889	0.0588	0.2582	0.7832	0.5	0.0808	-0.0967	0	0	0	-1	0	0	0	2	OnlyDuringLaterTimePoints
cce_4490		unknown	-0.1037	-0.1615	-0.5184	-0.7476	-3.2198	-0.7379	-0.846	0	0	0	1	1	1	1	2	OnlyDuringLaterTimePoints
cce_4500		hypothetical protein; contains a GCN5-related N-acetyltransferase domain	0.0154	-0.1454	-0.1459	-0.7336	-0.0173	-0.2157	-0.1123	0	0	0	1	0	0	0	2	OnlyDuringLaterTimePoints
cce_4502		unknown; contains an Armadillo-like helical domain	-0.2221	-0.4036	-0.4517	0.3504	0.1835	0.7259	0.8586	0	0	0	0	0	-1	-1	2	OnlyDuringLaterTimePoints
cce_4504		unknown; contains an alpha/beta hydrolase fold-1 domain	0.2493	-0.0316	-0.4693	0.0341	-0.9917	-0.0568	-1.5934	0	0	0	0	0	0	1	2	OnlyDuringLaterTimePoints
cce_4505		hypothetical protein; contains a MFS 1 domain	0.1598	0.0951	-0.2292	-0.1365	-0.2104	0.1367	-0.9272	0	0	0	0	0	0	1	2	OnlyDuringLaterTimePoints
cce_4517		WD40-like beta-propeller protein	-0.0716	0.1535	0.091	-0.6958	0.2379	0.2947	0.5901	0	0	0	0	0	0	-1	2	OnlyDuringLaterTimePoints
cce_4529		rfrA family pentapeptide repeat	0.0775	0.0537	-0.0325	-0.0692	-0.8623	-0.173	-1.0071	0	0	0	0	0	0	1	2	OnlyDuringLaterTimePoints
cce_4533		conserved hypothetical protein	0.0416	-0.0044	0.0649	-0.4546	-0.3878	-0.8838	0.1353	0	0	0	0	0	1	0	2	OnlyDuringLaterTimePoints
cce_4535		hypothetical protein	-0.2491	-0.038	0.3041	-0.7807	-0.262	-0.4504	1.1513	0	0	0	0	0	0	-1	2	OnlyDuringLaterTimePoints
cce_4548		DUF751-containing protein	0.1967	0.0662	0.2137	0.6237	-0.5794	0.3718	-0.1525	0	0	0	-1	0	0	0	2	OnlyDuringLaterTimePoints
cce_4555		putative polysaccharide pyruvyl transferase	-0.0697	0.3421	0.1362	-0.4358	0.6717	0.2067	0.9313	0	0	0	0	-1	0	-1	2	OnlyDuringLaterTimePoints
cce_4556		unknown; contains a heparan sulphate 6-sulfotransferase domain	-0.1796	0.1645	0.2658	-0.279	0.469	0.0143	0.6578	0	0	0	0	0	0	-1	2	OnlyDuringLaterTimePoints
cce_4574		unknown; contains a Mechanosensitive ion channel, MscS domain	-0.0976	0.1484	0.1674	-0.6773	0.6967	0.0697	0.7919	0	0	0	1	-1	0	-1	2	OnlyDuringLaterTimePoints
cce_4590		DUF370-containing protein	-0.217	0.2714	-0.2424	0.8823	-0.0212	0.3963	-0.3895	0	0	0	-1	0	0	0	2	OnlyDuringLaterTimePoints
cce_4604		putative Nucleotidyltransferase/Poly(A) polymerase	-0.0994	0.0011	-0.0856	0.7905	0.134	-0.3846	0.038	0	0	0	-1	0	0	0	2	OnlyDuringLaterTimePoints
cce_4609		conserved hypothetical protein	-0.0711	-0.1922	0.1825	-0.1523	-0.1222	0.5231	-0.8545	0	0	0	0	0	0	1	2	OnlyDuringLaterTimePoints
cce_4611		unknown	0.1182	0.0371	0.2876	1.0834	-0.0603	0.4649	-0.3859	0	0	0	-1	0	0	0	2	OnlyDuringLaterTimePoints
cce_4617		unknown	0.072	0.1365	0.2087	0.0366	1.1873	0.1475	0.7076	0	0	0	0	-1	0	-1	2	OnlyDuringLaterTimePoints
cce_4625		hypothetical protein; contains Endonuclease/exonuclease/phosphatase and Serralysin-like metalloprotease, C-terminal domains	0.3161	0.052	-0.2221	-0.317	-1.1146	-0.3819	-0.7606	0	0	0	0	1	0	0	2	OnlyDuringLaterTimePoints
cce_4631		hypothetical protein	0.1345	0.1504	0.1086	-0.3935	-0.9816	-0.3402	-0.3942	0	0	0	0	1	0	0	2	OnlyDuringLaterTimePoints
cce_4632		hypothetical protein	0.0627	0.1843	0.1016	-0.3209	-0.7604	-0.4372	-0.1834	0	0	0	0	1	0	0	2	OnlyDuringLaterTimePoints
cce_4635		unknown	0.0283	0.0778	-0.1224	-0.2653	0.8357	-0.1799	0.303	0	0	0	0	-1	0	0	2	OnlyDuringLaterTimePoints
cce_4636		rfrA family pentapeptide repeat	-0.1306	-0.2477	-0.2628	-1.131	0.4842	-0.5933	0.2847	0	0	0	1	0	0	0	2	OnlyDuringLaterTimePoints
cce_4648		hypothetical protein; contains photosynthetic reaction center H-chain cytoplasmic and CHP2271 C-terminal domains	-0.6161	-0.6828	0.4914	0.226	-0.0688	-1.1927	-0.0111	0	0	0	0	0	1	0	2	OnlyDuringLaterTimePoints
cce_4656		unknown	0.1174	0.0821	-0.2083	-0.1248	0.0282	0.1928	-0.6533	0	0	0	0	0	0	1	2	OnlyDuringLaterTimePoints
cce_4657		putative peptidase C14, caspase catalytic	0.0359	0.0156	0.092	-0.573	0.345	0.193	0.6311	0	0	0	0	0	0	-1	2	OnlyDuringLaterTimePoints
cce_4661		hypothetical protein; contains DUF820	0.0217	-0.0819	-0.0047	-0.2001	-0.7707	0.0112	-0.8857	0	0	0	0	1	0	1	2	OnlyDuringLaterTimePoints
cce_4662		unknown; contains a coenzyme F420 hydrogenase/dehydrogenase beta subunit domain	-0.1703	0.3962	0.0979	-1.2725	0.1363	-0.3932	0.6059	0	0	0	1	0	0	-1	2	OnlyDuringLaterTimePoints
cce_4667		hypothetical protein	0.1174	0.1358	0.0312	0.3768	-0.1416	-0.2741	-0.8357	0	0	0	0	0	0	1	2	OnlyDuringLaterTimePoints
cce_4670		unknown	0.0054	-0.0076	-0.077	0.2132	-0.0862	0.2027	-0.6096	0	0	0	0	0	0	1	2	OnlyDuringLaterTimePoints
cce_4672		hypothetical protein	-0.0227	-0.0352	0.2923	-0.6833	-2.1255	-0.3691	-2.7493	0	0	0	1	1	0	1	2	OnlyDuringLaterTimePoints
cce_4677		hypothetical protein; contains DUF156	0.2786	0.2166	0.2944	0.1031	-0.1656	0.6691	-0.0532	0	0	0	0	0	-1	0	2	OnlyDuringLaterTimePoints
[truncated: 90 more rows]
